# Supplementary material
Source: PubMed Central journal article supplement (PMC6309916)
Supplement: NIHMS997333-supplement-SI.pdf [file NIHMS997333-supplement-SI.pdf]

## Supporting Information

# Biosynthesis of Heptacyclic Duclauxins Requires Extensive Redox Modifications of the Phenalenone Aromatic Polyketide

Shu-Shan Gao<sup>§,#</sup>, Tao Zhang<sup>†,#</sup>, Marc Garcia-Borràs<sup>‡</sup>, Yiu-Sun Hung<sup>§</sup>, John M. Billingsley<sup>§</sup>, K. N. Houk<sup>‡,\*</sup>, Youcai Hu<sup>†,\*</sup>, and Yi Tang<sup>§,‡,\*</sup>

<sup>§</sup>Department of Chemical and Biomolecular Engineering and <sup>‡</sup>Department of Chemistry and Biochemistry, University of California, Los Angeles, California 90095, United States.

<sup>†</sup>State Key Laboratory of Bioactive Substance and Function of Natural Medicines, Institute of Materia Medica, Chinese Academy of Medical Sciences & Peking Union Medical College, Beijing 100050, China.

\*Correspondence: [\\*yitang@ucla.edu](mailto:yitang@ucla.edu), [\\*hok@chem.ucla.edu](mailto:hok@chem.ucla.edu), [\\*huyoucai@imm.ac.cn](mailto:huyoucai@imm.ac.cn).

## TABLE OF CONTENTS

|                                                                                                                                                                                                                                                                         |        |
|-------------------------------------------------------------------------------------------------------------------------------------------------------------------------------------------------------------------------------------------------------------------------|--------|
| <b>EXPERIMENTAL PROCEDURES:</b>                                                                                                                                                                                                                                         | Page   |
| 1. Strains and Culture Conditions.                                                                                                                                                                                                                                      | S4     |
| 2. <i>T. stipitatus</i> RNA Isolation, Purification and cDNA Preparation.                                                                                                                                                                                               | S4     |
| 3. Plasmid Construction.                                                                                                                                                                                                                                                | S4     |
| 4. Construction of <i>T. stipitatus</i> Mutants.                                                                                                                                                                                                                        | S5     |
| 5. Yeast Reconstitution of Phenalenone Biosynthesis Pathway.                                                                                                                                                                                                            | S6     |
| 6. Heterologous Production in <i>A. nidulans</i> A1145 $\Delta$ ST $\Delta$ EM .                                                                                                                                                                                        | S6     |
| 7. <i>In Sillico</i> Genomic Analysis                                                                                                                                                                                                                                   | S6     |
| 8. Chemical Complementation Studies.                                                                                                                                                                                                                                    | S6     |
| 9. LC/MS Analysis.                                                                                                                                                                                                                                                      | S7     |
| 10. Protein Expression and Purification of DuxM from <i>E. coli</i> strain BL21 (DE3).                                                                                                                                                                                  | S7     |
| 11. Protein Expression and Purification of DuxJ from <i>S. cerevisiae</i> strain BJ5464-NpgA.                                                                                                                                                                           | S7     |
| 12. Expression and Preparation of DuxL-containing Microsomes for <i>in vitro</i> Assay.                                                                                                                                                                                 | S7     |
| 13. <i>In vitro</i> activity assay for DuxM, DuxJ, and DuxL.                                                                                                                                                                                                            | S8     |
| 14. Chemical Analysis and Compound Isolation                                                                                                                                                                                                                            | S8     |
| 15. Purification of compound <b>14</b> .                                                                                                                                                                                                                                | S8     |
| 16. Computational Methods.                                                                                                                                                                                                                                              | S8     |
| <br><b>SUPPLEMENTARY REFERENCES</b>                                                                                                                                                                                                                                     | <br>S9 |
| <br><b>SUPPLEMENTARY TABLES:</b>                                                                                                                                                                                                                                        |        |
| <b>Table S1.</b> Primers used in this study.                                                                                                                                                                                                                            | S10    |
| <b>Table S2.</b> Deduced functions of the ORFs in <i>dux</i> gene cluster.                                                                                                                                                                                              | S13    |
| <b>Table S3.</b> <i>Saccharomyces cerevisiae</i> and <i>Aspergillus nidulans</i> strains used in this study.                                                                                                                                                            | S14    |
| <b>Table S4.</b> <sup>1</sup> H NMR (500 MHz) and <sup>13</sup> C NMR (125 MHz) data of compound <b>12</b> in DMSO- <i>d</i> <sub>6</sub> .                                                                                                                             | S15    |
| <b>Table S5.</b> <sup>1</sup> H NMR (500 MHz) and <sup>13</sup> C NMR (125 MHz) data of compound <b>10</b> in DMSO- <i>d</i> <sub>6</sub> .                                                                                                                             | S16    |
| <b>Table S6.</b> <sup>1</sup> H NMR (500 MHz) and <sup>13</sup> C NMR (125 MHz) data of compound <b>13</b> in DMSO- <i>d</i> <sub>6</sub> .                                                                                                                             | S17    |
| <b>Table S7.</b> <sup>1</sup> H NMR (500 MHz) and <sup>13</sup> C NMR (125 MHz) data of compound <b>14</b> in DMSO- <i>d</i> <sub>6</sub> .                                                                                                                             | S18    |
| <b>Table S8.</b> <sup>1</sup> H NMR (500 MHz) and <sup>13</sup> C NMR (125 MHz) data of compound <b>11</b> in DMSO- <i>d</i> <sub>6</sub> .                                                                                                                             | S19    |
| <b>Table S9.</b> ICP-MS measurement results of FLAG-tagged DuxM.                                                                                                                                                                                                        | S20    |
| <br><b>SUPPLEMENTARY FIGURES:</b>                                                                                                                                                                                                                                       |        |
| <b>Figure S1.</b> Natural products of duclauxin family from different fungi                                                                                                                                                                                             | S21    |
| <b>Figure S2.</b> Proposed biosynthetic pathway for duclauxin <b>1</b> : <i>via</i> a tri-keto, a di-keto and a hydride intermediates.                                                                                                                                  | S22    |
| <b>Figure S3.</b> Gene knock-out of <i>dux</i> gene cluster in <i>T. stipitatus</i> and PCR verification of mutant.                                                                                                                                                     | S23    |
| <b>Figure S4.</b> LC-MS analysis of heterologous expression of DuxI in <i>Saccharomyces cerevisiae</i> BJ5464.                                                                                                                                                          | S24    |
| <b>Figure S5.</b> Product profiles of chemical complementation studies to $\Delta$ <i>duxI</i> of <i>T. stipitatus</i> .                                                                                                                                                | S25    |
| <b>Figure S6.</b> Gene knock-out of <i>duxA</i> , <i>duxD</i> , <i>duxG</i> , <i>duxH</i> , <i>duxJ</i> , <i>duxL</i> , and <i>duxM</i> in <i>T. stipitatus</i> and PCR verification of the mutants.                                                                    | S26    |
| <b>Figure S7.</b> LC-MS analysis of organic extract obtained from the wild type and $\Delta$ <i>dux</i> mutants including $\Delta$ <i>duxG</i> , $\Delta$ <i>duxH</i> , $\Delta$ <i>duxJ</i> , $\Delta$ <i>duxM</i> , $\Delta$ <i>duxA</i> , and $\Delta$ <i>duxL</i> . | S27    |
| <b>Figure S8.</b> RT-PCR analysis of genes in <i>dux</i> gene clusters in <i>T. stipitatus</i> .                                                                                                                                                                        | S28    |
| <b>Figure S9.</b> SDS-PAGE of heterogeneously expressed DuxM from <i>E. coli</i> BL21(DE3) and DuxJ from <i>S. cerevisiae</i> BJ5464-NpgA.                                                                                                                              | S29    |
| <b>Figure S10.</b> LC-MS analysis result of <b>14</b> stored in methanol for 30 min.                                                                                                                                                                                    | S30    |
| <b>Figure S11.</b> BLASTP alignment of DuxM in <i>T. stipitatus</i> .                                                                                                                                                                                                   | S31    |
| <b>Figure S12</b> Structure analysis of DuxM by Phyre2 showed DuxM is close to quercetinase (quercetin 2, 3-dioxygenase) and multiple sequence alignment of DuxM and other fungal cupin family enzymes                                                                  | S32    |
| <b>Figure S13</b> Proposed biosynthetic pathway for decarboxylation of <b>14</b> to form <b>10</b> catalyzed by DuxM.                                                                                                                                                   | S33    |
| <b>Figure S14</b> Density functional theory (DFT) calculations based mechanism of DuxM.                                                                                                                                                                                 | S34    |
| <b>Figure S15</b> Two proposed routes for the DuxD catalyzed decarboxylation.                                                                                                                                                                                           | S35    |
| <b>Figure S16</b> LC-MS analysis results of chemical complementation studies in yeast.                                                                                                                                                                                  | S36    |
| <b>Figure S17</b> UV and MS spectra of <b>1</b> .                                                                                                                                                                                                                       | S37    |
| <b>Figure S18</b> UV and MS spectra of <b>10</b> .                                                                                                                                                                                                                      | S38    |
| <b>Figure S19</b> UV and MS spectra of <b>11</b> .                                                                                                                                                                                                                      | S39    |
| <b>Figure S20</b> UV and MS spectra of <b>4</b> .                                                                                                                                                                                                                       | S40    |
| <b>Figure S21</b> UV and MS spectra of <b>12</b> .                                                                                                                                                                                                                      | S41    |
| <b>Figure S22</b> UV and MS spectra of <b>13</b> .                                                                                                                                                                                                                      | S42    |

|                                                                                                                                                                     |        |
|---------------------------------------------------------------------------------------------------------------------------------------------------------------------|--------|
| <b>Figure S23</b> UV and MS spectra of <b>14</b> .                                                                                                                  | S43    |
| <b>Figure S24</b> The HMBC spectrum of the mixture of <b>14</b> and <b>15</b> , which indicates the correlation from 3- <i>O</i> -methyl group to C1 in <b>15</b> . | S44    |
| <b>Figures S25-28</b> 1D and 2D NMR spectra of <b>12</b> in acetone- <i>d</i> <sub>6</sub> .                                                                        | S45-48 |
| <b>Figures S29-32</b> 1D and 2D NMR spectra of <b>10</b> in DMSO- <i>d</i> <sub>6</sub> .                                                                           | S49-52 |
| <b>Figures S33-36</b> 1D and 2D NMR spectra of <b>13</b> in DMSO- <i>d</i> <sub>6</sub> .                                                                           | S53-56 |
| <b>Figures S37-40</b> 1D and 2D NMR spectra of <b>14</b> in DMSO- <i>d</i> <sub>6</sub> .                                                                           | S57-60 |
| <b>Figures S41-S44</b> 1D and 2D NMR spectra of <b>11</b> in DMSO- <i>d</i> <sub>6</sub> .                                                                          | S61-64 |
| <b>SUPPLEMENTARY COMPUTATIONAL DATA</b>                                                                                                                             | S65-76 |

## Experimental Procedures:

### 1. Strains and Culture Conditions.

The *Talaromyces stipitatus* strain (syn. *Penicillium stipitatum*) was obtained from Agriculture Research Service Culture Collection (NRRL 1006) and was used as the parental strain in our study. Both the wild-type and its mutant strains were grown on MEPA medium (3% malt extract broth, BD; 0.3% soy flour, agar 15 g/L) for both production of secondary metabolites and mRNA extraction at 28 °C. For gene knock-out in *T. stipitatus*, potato dextrose agar (PDA, BD) with 1.2 M sorbitol and 400 µg/mL hygromycin was used for protoplast regeneration and antibiotic resistance selection. *Escherichia coli* DH10B (Invitrogen) and Trans1-T1 (TransGen) was used for routine plasmid cloning. *Saccharomyces cerevisiae* strain BJ5464-NpgA (*MATa ura3-52 his3-Δ200 leu2-Δ1 trp1pep4::HIS3 prb1Δ1.6R can1 GAL*) was used for *in vivo* yeast DNA recombination cloning and the yeast expression host<sup>1</sup>. YPD (20 g/L peptone, 10 g/L yeast extract, 20 g/L dextrose) was used for the routine growth of yeast strain BJ5464-NpgA and its derivatives at 30 °C. SD dropout semisynthetic medium was used for selection of plasmids transformed into *S. cerevisiae*.

### 2. *T. stipitatus* RNA Isolation, Purification and cDNA Preparation.

Mycelia of *T. stipitatus* were inoculated in MEPA medium, incubated at 28 °C for 5 days, and collected for lyophilization. The mycelia were ground after freezing with liquid nitrogen, and solubilized in 1 mL Trizol (Invitrogen), and vortexed for 3 min. 200 µL of chloroform was added, and the mixture was vortexed and centrifuged at 13,000 rpm for 15 min. The supernatant (600 µL) was extracted once again with an equal volume of chloroform. RNA was precipitated from the supernatant with an equal volume of isopropanol and resuspended in RNase-free water. The genomic DNA was further digested with RNase-free DNase I Kit (Takara). Genomic DNA was further removed by digestion with RNase-free DNase I (Takara). RNA was purified by RNAClean purification kit (Tiangen). RNA integrity was confirmed by electrophoresis on TAE buffer (Tris-acetate-EDTA) agarose gel, and the concentration was determined by Nanodrop (Thermo Scientific). The first-strand cDNA was synthesized from 500 ng of total RNA by EasyScript® reverse transcriptase (Transgen) with random primers and oligo-dT<sub>18</sub> primer (Takara) according to the manufacturer's instructions. PCR was performed with Q5 high-fidelity DNA polymerase (New England Biolabs) in the presence of 30 ng of reverse transcribed RNA. Primers are listed in Table S1 (Supplementary information). The gene expression level was analyzed by PCR using the specific primers (Supplementary Table S1) and cDNA as template.

### 3. Plasmid Construction.

Primers and plasmids were listed in Supplementary Table S1 and S3, respectively. For construction of the plasmids for gene knock-out in *T. stipitatus* which based on the split-marker strategy,<sup>1-2</sup> the plasmid pAN7-14 was used as the template to amplify *hph* upstream fragment with primers Hph-Up F and Hph-Up R, and *hph* downstream fragment with primers Hph-Dn F and Hph-Dn R.<sup>1</sup> For constructions of the upstream DNA fragments (Up) and downstream DNA fragments (Dn) of specific genes, including *duxD*-Up, *duxD*-Dn, *duxG*-Up, *duxH*-Up, *duxJ*-Up, *duxL*-Up, *duxL*-Dn, *duxM*-Up and *duxM*-Dn, *in vivo* yeast recombination cloning was performed by transforming the *S. cerevisiae* BJ5464-NpgA with DNA fragments with >35 bp overlaps and includes a 2 µm plasmid backbone (derived from pRS426) using an *S.C.* EasyComp Transformation kit (Zymo Research). The plasmid in the correct transformant screened by colony PCR was rescued using Yeast Plasmid Miniprep kit (Solarbio). For construction of knockout cassettes of *duxA*-Up and *duxA*-Dn, the homologous regions were amplified and digested by *SacI/PstI* and *HindIII/PstI*, respectively. The Hph-Up fragment and Hph-Dn were digested with *PstI/HindIII* and *PstI/EcoRI*, simultaneously. Then, the above fragments, *i.e.* *duxA*-Up/Hph-Up and *duxA*-Dn/Hph-Dn were colligated into pET30a which was digested by *SacI/HindIII* and *SacI/EcoRI*, respectively. The same strategy was used for construction of the knockout cassettes of *duxG*-Dn, *duxH*-Dn, *duxI*-Up, *duxI*-Dn, and *duxJ*-Dn. The correct plasmids were used as template to amplify the knockout cassettes.

Yeast expression plasmids pXW02 (LEU2 marker), pXW06 (TRP1 marker), pXW55 (URA3 marker), pGSS1 and pGSS4 were used for construction of the heterologous expression plasmids by *in vivo* homologous recombination in yeast. <sup>1</sup> All the enzymes were expressed under a *ADH2p* promoter and a *ADH2t* terminator. For DuxM expression, primers De-25 + De-26 was used to amplify the DNA fragments of *duxM* cDNA, and ligated into *NdeI/PmeI*-digested pXW02 to create the plasmid pGSS41. The *ADH2p-duxM-ADH2t* cassette was amplified by the primer pair Not-F/Not-R and then ligating into the pGSS4 digested with *NotI* to give pGSS49. For DuxJ expression, primer pair De-20a/De-21a was used to amplify the DNA fragments of *duxJ* cDNA, and transformed into *NdeI/PmII*-digested pXW02 to create the plasmid pGSS40 using yeast homologous recombination. For DuxL expression, primer pair *duxL-XW55-F/duxL-XW55-R* was used to amplify the DNA fragments of *duxJ* cDNA, and transformed into *SpeI/PmeI*-digested pXW55 to create the plasmid pGSS92. For DuxB' expression, primer pair *duxB'-2-XW02-F+duxB'-2-XW02-R* was used to amplify the DNA fragments of *duxB'* cDNA, and transformed into *NdeI/PmeI*-digested pXW02 to create the plasmid pGSS117 using yeast homologous recombination.

For heterologous expression in *A. nidulans* A1145  $\Delta$ ST $\Delta$ EM, plasmids pYTU, pYTP, pYTR were used as backbones to insert genes which contain auxotrophic markers for uracil (pyrG), pyridoxine (pyroA), and riboflavin (riboB), respectively. Genes to be expressed were amplified through Polymerase Chain Reaction (PCR) using the gDNA of *T. stipitatus* as a template. The pieces were mixed with the corresponding backbone digested with *PacI* and *SwaI* and assembled using yeast homologous recombination with BJ5464-NpgA. Primer pair of *duxD-pYTU-F+duxD-pYTU-R* was used to amplify *duxD* gDNA, and inserted into *PacI/SwaI*-digested pYTU using yeast homologous recombination to create the plasmid pGSS119. Primer pairs of A31-Dux-P+A32-Dux-U, A23-Dux-P+A24-Dux-P, A25-Dux-P+A26-Dux-P, A27-Dux-P+A28-Dux-P, and A29-Dux-P+A30-Dux-P were used to amplify *duxD*, promoter *GlaA*, *duxM*, promoter *AmyB*, *duxJ* with gDNA as templates, respectively, and then inserted into *PacI/SwaI*-digested pYTR using yeast homologous recombination to create the plasmid pGSS101. Primer pairs including A1-Dux-P+A2-Dux-P, A3-Dux-P+A4-Dux-P, A5-Dux-P+A6-Dux-P, A7-Dux-P/A8-Dux-P were used to amplify *duxE*, promoter *GlaA*, and *duxI* with gDNA as template, respectively, and then inserted into *PacI/SwaI*-digested pYTR using yeast homologous recombination to create the plasmid pGSS100. Primer pair A35-Dux-U/A36-Dux-U was used to amplify *duxG* with gDNA as template and inserted into *PacI/SwaI*-digested pYTU using yeast homologous recombination to create the plasmid pGSS102.

#### 4. Construction of *T. stipitatus* Mutants.

All the mutants were constructed in *T. stipitatus* based on the hygromycin split-marker strategy. <sup>1-2</sup> The upstream split-marker DNA for KO of *duxA*, *duxD*, *duxG*, *duxH*, *duxI*, *duxJ*, *duxL*, and *duxM* genes were amplified with primer pairs including AKC *Uko* for+S2, DKC *Uko* for+S2, GKC *Uko* for+S2, HKC *Uko* for+S2, IKC *Uko* for+S2, JKC *Uko* for+S2, LKC *Uko* for+S2, and MKC *Uko* for+S2 from plasmids AKC *Uko*, DKC *Uko*, GKC *Uko*, HKC *Uko*, IKC *Uko*, JKC *Uko*, LKC *Uko*, and MKC *Uko*, respectively. The downstream split-marker DNA for KO of *duxA*, *duxD*, *duxG*, *duxH*, *duxI*, *duxJ*, *duxL*, and *duxM* genes were amplified with primer pairs including AKC *Dko* rev+S3, DKC *Uko* for+S3, GKC *Dko* rev+S3, HKC *Dko* rev+S3, IKC *Dko* rev+S3, JKC *Dko* rev+S3, LKC *Dko* rev+S3, and MKC *Dko* rev+S3 from plasmids AKC *Dko*, DKC *Dko*, GKC *Dko*, HKC *Dko*, IKC *Dko*, JKC *Dko*, LKC *Dko*, and MKC *Dko*, respectively. The PCR products of knockout cassettes were recovered by gel recycling kit (Axygen) and dissolved in 50  $\mu$ L STC buffer. Split-marker DNA was introduced into *T. stipitatus* by protoplast transformation. Fresh spores of *T. stipitatus* were collected on PDA for 14 days at 28 °C, and then induced to young germ tubes in PDB (BD) with concentration of 10<sup>8</sup> spores mL<sup>-1</sup> for 36 hours at 28 °C with 180 rpm agitation. Mycelia were harvested, washed twice with the osmotic medium (1.2 M MgCl<sub>2</sub>, 10 mM sodium phosphate, pH 5.8), and resuspended in the enzyme cocktail solution (3 mg/mL lysing enzymes, 2 mg/mL yatalase in osmotic medium) and incubated at 30 °C for overnight. The solution was transferred to a 50 mL tube and an equal volume of trapping buffer (0.6 M sorbitol, 0.1 M Tris-HCl, pH 7.0)

was added before centrifuging at 4 °C (3,750 rpm) for 10 min. Protoplasts in the supernatant were transferred to a new tube and an equal volume of STC buffer (1.2 M sorbitol, 10 mM CaCl<sub>2</sub>, 10 mM Tris HCl, pH 7.5) was added before centrifuging at 4 °C (3,750 rpm) for 10 min. After washing twice with STC buffer, protoplasts were gently mixed with DNA and incubated for 50 minutes on ice. One milliliter of PEG solution (60% PEG 4000, 50 mM CaCl<sub>2</sub>, 50 mM Tris-HCl, pH 7.5) was added to 100 µL of protoplast mixture, and the mixture was incubated for 20 min at room temperature and spread on the regeneration selection medium (PDA, 1.2 M sorbitol, 400 µg/mL hygromycin B). After incubation at 28 °C for 4-5 days, the transformants were inoculated on fresh PDA selection medium with stationary incubation for about 4 days to confirm the genotype by diagnostic PCRs after miniprep genomic DNA. Primers used for the generation of gene deletion cassettes and diagnostic PCRs are listed in Table S1.

### 5. Yeast Reconstitution of Phenalenone Biosynthesis Pathway.

*S. cerevisiae* strain BJ5464-NpgA was transformed with appropriate plasmid(s) as described in supplementary Table S3. Yeast cells containing transformed plasmid(s) were initially cultured in the drop out medium overnight and transferred to 50 mL of liquid YPD medium for additional 3-day culture. Extracted samples from approximately 0.5 mL of culture were loaded for LC/MS analysis.

### 6. Heterologous Production in *A. nidulans* A1145 $\Delta$ ST $\Delta$ EM.

Protoplasts were generated by scraping spores from a solid CD medium (10 g/L glucose, 50 mL/L 20x nitrate salts, 1 mL/1L trace elements, 20% agar) plate. The spores were transferred to 25 mL of liquid CD medium and incubated for 12-13 hours at 37 °C at 250 rpm. After incubation, the germlings were harvested and washed with 10 mL of Osmotic medium (1.2 M MgSO<sub>4</sub>, 10 mM NaPO<sub>4</sub>) twice. The germlings were then transferred into 10 mL of Osmotic medium containing 30 mg of lysing enzyme from *Trichoderma* and 20 mg of Yatalase. The culture was incubated for 12 hours at 28 °C at 80 rpm. The cells were poured into a 30 mL Corex tube and overlaid with 10 mL of Trapping buffer (0.6 M Sorbitol, 0.1 M Tris-HCl). The tube was centrifuged at 5,000 rpm. The protoplasts were then removed from the interface of the two buffers and transferred to sterile tubes. 2 volumes of STC buffer (1.2 M sorbitol, 10 mM CaCl<sub>2</sub>, 10 mM Tris-HCl) was added to the protoplasts. DNA and 60% PEG4000 solution were added to the protoplast solution and incubated at room temperature for 20 min. The cells were then plated onto solid CD-sorbitol medium (10 g/L glucose, 50 mL/L 20x nitrate salts, 1 mL/1 L trace elements, 20% agar, 1.2 M sorbitol). Until transformants being seen, the spores were re-streaked onto solid CD-ST production medium (20 g/L starch, 20 g/L peptone, 50 mL/L nitrate salts, 1 mL/1 L trace elements). Deuterium labeled precursors used for feeding were purchased from Cambridge Isotope Laboratories.

### 7. *In Silico* Genomic Analysis.

The PhnA protein sequence, as described in previous work,<sup>1</sup> was used for local BLASTP query of *Talaromyces stipitatus* genome (NZ\_ABAS00000000.1).<sup>3</sup> AntiSMASH platform was used for genome mining and bioinformatic analysis of secondary metabolites biosynthetic clusters.<sup>4</sup> Gene predictions of the coding sequences were performed via FGENESH program ([www.softberry.com](http://www.softberry.com)) or 2ndFind platform (<http://biosyn.nih.gov/2ndFind/>) and manually checked based on homologous gene/proteins in the NCBI database. The function of the protein was further analyzed in Phyre2 database (<http://www.sbg.bio.ic.ac.uk/phyre2/html>).

### 8. Chemical Complementation Studies.

For chemical complementation of  $\Delta$ *duxI* strain of *T. stipitatus* with compounds (solubilized in DMSO), spores of  $\Delta$ *duxI* were inoculated in modified MEPA plate together with 10 µg/mL compounds **7**, **14**, **15**, **19**, **8**, **13** and **12**, and further cultured for 3 days at 28 °C. The mycelia and medium were extracted for LC/MS analysis.

## 9. LC/MS Analysis.

Cultures of *Aspergillus nidulans*, *S. cerevisiae* or *E. coli* cells were extracted with acetone:ethyl acetate (20 : 80). After brief centrifugation, the supernatant organic phase was dried and solubilized in DMSO for LC/MS injection. LC-MS analysis were performed on a Shimadzu 2020 EVLC-MS (Phenomenex® Luna, 5 $\mu$ , 2.0  $\times$  100 mm, C18 column) using positive and negative mode electrospray ionization with a linear gradient of 5–95% acetonitrile (MeCN)-H<sub>2</sub>O in 15 minutes followed by 95% MeCN for 5 minutes with a flow rate of 0.3 mL/min. Cultures of wild type strain, or deletant mutants of *T. stipitatus* cells were extracted with ethyl acetate. After 12,000 rpm, 10 min centrifugation, the supernatant organic phase was dried and solubilized in acetonitrile for LC-MS analyses. LC-MS analyses were performed on a Waters ACQUITY H-Class UPLC-MS with a PDA detector and a QDA mass detector (ACQUITY UPLC®BEH, 1.7  $\mu$ m, 2.1 $\times$  50 mm, C18 column) using positive and negative mode electrospray ionization with a linear gradient of 5-99% acetonitrile-H<sub>2</sub>O (v/v, 0.02% formic acid) for 8 minutes followed by 99% acetonitrile-H<sub>2</sub>O (v/v, 0.02% formic acid) for 4 minutes with a flow rate of 0.4 mL/min.

## 10. Protein Expression and Purification of DuxM from *E. coli* strain BL21 (DE3).

The expression plasmid pGSS17 was transformed into *E. coli* strain BL21 (DE3) for expression of DuxM. Cells in LB medium (1 L) supplemented with ampicillin (100 mg/L) inoculated with BL21(DE3)/pGSS17 were grown to an OD<sub>600</sub> of 0.6. Protein expression was then induced with 0.12 mM of isopropylthio- $\beta$ -D-galactoside (IPTG, Sigma-Aldrich), and continued cultivation with shaking (250 rpm) for additional 16 h at 16 °C. All of the enzyme purification steps were performed at 4 °C using Nickel-NTA affinity chromatography following standard protocols. Purified proteins were concentrated and exchanged into buffer C (50 mM Tris-HCl, pH 7.9, 50 mM NaCl, and 5% glycerol) with Centriprep filters (Amicon). The protein was stored in buffer C at -80 °C. Protein concentration was determined by Bradford assay using bovine serum albumin as a standard.

## 11. Protein Expression and Purification of DuxJ from *S. cerevisiae* strain BJ5464-NpgA.

The expression plasmid pGSS31 was transformed into *S. cerevisiae* strain BJ5464-NpgA for expression of DuxJ. Cells in YPD medium inoculated with BJ5464-NpgA/pGSS31 were grown for 3 days for protein expression. *S. cerevisiae* cells were harvested by centrifugation (5,000 rpm, 15 min, and 4 °C), re-suspended in 300 mL yeast lysis buffer and lysed with sonication on ice. Cellular debris was removed by centrifugation (17,000g, 1 h, and 4 °C). FLAG-tagged proteins were purified by using Anti-FLAG®M1 Agarose Affinity Gel (Sigma-Aldrich), following the manufacture's protocols. Purified proteins were concentrated, buffer exchanged into 50 mM potassium phosphate buffer (pH 7.0) with 10% glycerol, concentrated, sub-aliquoted and flash frozen. Protein concentrations were determined using the Bradford assay.

## 12. Expression and Preparation of DuxL-containing Microsomes for *in vitro* Assay.

For expression of DuxL, the cells were grown in YPD medium supplemented with 1% dextrose at 28 °C with shaking for 48 hours. The microsomes were prepared according to the protocol described previously.<sup>1</sup> Briefly, the cells were harvested by centrifugation (3,750 rpm at 4 °C for 10 min) and the cell pellet was washed with 100 mL of TES buffer (50 mM Tris-HCl, pH, 7.5, 1 mM EDTA, 0.6 M sorbitol). The cells were centrifuged as above, resuspended in 100 mL of TES-M (TES supplemented with 10 mM 2-mercaptoethanol), and allowed to incubate at room temperature for 10 min. The yeast cells were centrifuged again at 3,750 rpm for 10 min, and the pellet was resuspended in 2.5 mL of extraction buffer (1% bovine serum albumin, fraction V, 2 mM 2-mercaptoethanol, 1 mM phenylmethylsulfonyl fluoride, all dissolved in TES). Zirconia/silica beads (0.5 mm in diameter, Biospec Products) were added until skimming the surface of the cell suspension. Cell walls were disrupted manually by hand shaking in a cold room for 10 min at 30-s intervals separated by 30-s intervals on ice. Cell

extracts were transferred to a 50-mL centrifuge tube, the Zirconia/silica beads were washed three times with 5 mL of extraction buffer, and the washes were pooled with the original cell extracts. Finally, microsomes were obtained by differential centrifugation at 10,000g for 10 min at 4°C to remove cellular debris followed by centrifugation at 100,000g for 70 min at 4°C. The microsomal pellets were resuspended in 1.5 mL of TEG-M buffer (50 mM Tris-HCl, pH 7.5, 1 mM EDTA, 20% glycerol, and 1.5 mM 2-mercaptoethanol) and stored frozen at -80 °C.

### 13. *In vitro* Activity Assay for DuxM, DuxJ and DuxL.

DuxM activity was assayed by monitoring the conversion of substrates into products as analyzed by LC/MS. A typical 100  $\mu$ L assay solution contained 100 mM potassium phosphate buffer (pH 8.0), 30  $\mu$ M DuxM and 1mM substrate. The reactions were performed at 28 °C and quenched with methanol.

For *in vitro* activity assay of DuxJ, a typical 100 $\mu$ L assay solution contained 100 mM phosphate buffer (pH 8.0), 4 mM NADPH and 1 mM **14**. The reaction was performed at 28 °C and quenched with equal volume of methanol. Protein precipitate from the reactions was removed by centrifugation. The supernatant was then analyzed on LC-MS. LC-MS analyses were performed on a Shimadzu 2020 EV LC-MS (Kinetex™ 1.7  $\mu$ m C18 100 Å, LC Column 100 $\times$ 2.1 mm) using positive and negative mode electrospray ionization with a linear gradient of 5-95% MeCN-H<sub>2</sub>O in 15 minutes followed by 95% MeCN for 3 minutes with a flow rate of 0.3 mL/min.

For *in vitro* synthesis of **12**, 12.5 mg/mL (wet weight) microsomal fractions containing DuxL and Pe-CPR, 0.5 mM **11**, 4 mM NADPH and NADPH regeneration system (BD) solution A and B in 100 mM PBS, pH 7.4, were incubated in a total 100  $\mu$ L reaction. The reaction was incubated at room temperature overnight and extracted with 100  $\mu$ L ethyl hexanes-acetate (1:1) twice. The organic phase was dried and dissolved in 20  $\mu$ L MeOH for analysis on LC-MS.

### 14. Chemical Analysis and Compound Isolation.

From yeast, the ethyl acetate extract from a 4 L YPD liquid medium was evaporated to dryness to yield the crude extract. From *T. stipitatus*, the acetone extract from a 2 L PDA solid agar extract of mutant was evaporated to dryness and partitioned between ethyl acetate/H<sub>2</sub>O three times. To purify the desired compound, crude extracts were separated by silica chromatography, Sephadex-LH20, reverse phase-C18 and additional HPLC steps as required. The purity of each compound was checked by LC-MS, and the structure was confirmed by NMR. <sup>1</sup>H, <sup>13</sup>C and 2D NMR spectra were obtained using DMSO-*d*<sub>6</sub> or CD<sub>3</sub>OD as solvent on Bruker AV500 spectrometer with a 5 mm dual cryoprobe at the UCLA Molecular Instrumentation Center.

### 15. Purification of 14.

The crude extract was subjected to HPLC chromatography on a Phenomenex Luna column (250 $\times$ 10 mm, 5  $\mu$ m, 40 °C, flow 4 mL/min) eluted with isocratic wash of 30% MeCN in water for 20 minutes to yield a sub-fraction. The sub-fraction was further subjected to HPLC chromatography on Phenomenex Luna column (250 $\times$ 10 mm, 5  $\mu$ m, 40 °C, flow 4 mL/min) with isocratic wash of 50% MeOH in water for 20 minute. The purified fraction was cooled immediately on ice. The solvent was quickly removed under reduced pressure, and remaining water was frozen and lyophilized to yield 0.7 mg of **14**.

### 16. Computational Methods.

DFT calculations were performed using Gaussian 09.<sup>5</sup> Geometry optimizations and frequency calculations were performed using unrestricted B3LYP (UB3LYP)<sup>6-8</sup> with the 6-31G(d) basis set. Entropies were calculated for 1 atm and 298.15 K. Single point energy calculations were performed using the dispersion-corrected functional (U)B3LYP-D3(BJ)<sup>9-10</sup> with the 6-311++G(d,p) basis set, within the CPCM polarizable conductor model (diethyl



ether,  $\epsilon = 4$ )<sup>11-12</sup> to have an estimation of the dielectric permittivity in the enzyme active site. The use of a dielectric constant  $\epsilon=4$  has been proved to be a good and general model to account for electronic polarization and small backbone fluctuations in enzyme active sites.<sup>13-14</sup> All stationary points were verified as minima or first-order saddle points by a vibrational frequency analysis.

## References

1. Gao, S. S.; Duan, A.; Xu, W.; Yu, P.; Hang, L.; Houk, K. N.; Tang, Y., *J. Am. Chem. Soc.* **2016**, *138*, 4249-4259.
2. Davison, J.; al Fahad, A.; Cai, M.; Song, Z.; Yehia, S. Y.; Lazarus, C. M.; Bailey, A. M.; Simpson, T. J.; Cox, R. J., *Proc. Nat. Acad. Sci. U. S. A.* **2012**, *109*, 7642-7647.
3. Nierman, W. C.; Fedorova-Abrams, N. D.; Andrianopoulos, A., *Genome A.* **2015**, *3*, e01559-14
4. Blin, K.; Medema, M. H.; Kottmann, R.; Lee, S. Y.; Weber, T., *Nucleic Acids Res.* **2017**, *45*, D555-D559.
5. M. J. Frisch, G. W. T., H. B. Schlegel, G. E. Scuseria, M. A. Robb, J. R. Cheeseman, G. Scalmani, V. Barone, G. A. Petersson, H. Nakatsuji, X. Li, M. Caricato, A. Marenich, J. Bloino, B. G. Janesko, R. Gomperts, B. Mennucci, H. P. Hratchian, J. V. Ortiz, A. F. Izmaylov, J. L. Sonnenberg, D. Williams-Young, F. Ding, F. Lipparini, F. Egidi, J. Goings, B. Peng, A. Petrone, T. Henderson, D. Ranasinghe, V. G. Zakrzewski, J. Gao, N. Rega, G. Zheng, W. Liang, M. Hada, M. Ehara, K. Toyota, R. Fukuda, J. Hasegawa, M. Ishida, T. Nakajima, Y. Honda, O. Kitao, H. Nakai, T. Vreven, K. Throssell, J. A. Montgomery, Jr., J. E. Peralta, F. Ogliaro, M. Bearpark, J. J. Heyd, E. Brothers, K. N. Kudin, V. N. Staroverov, T. Keith, R. Kobayashi, J. Normand, K. Raghavachari, A. Rendell, J. C. Burant, S. S. Iyengar, J. Tomasi, M. Cossi, J. M. Millam, M. Klene, C. Adamo, R. Cammi, J. W. Ochterski, R. L. Martin, K. Morokuma, O. Farkas, J. B. Foresman, and D. J. Fox, Gaussian 09, Revision A. 02. Gaussian. Inc.: Wallingford, CT **2009**.
6. Becke, A. D., *Phys. Rev. A.* **1988**, *38*, 3098-3100.
7. Becke, A. D., *J. Chem. Phys.* **1993**, *98*, 5648-5652.
8. Lee, C.; Yang, W.; Parr, R. G., *Phys. Rev. B* **1988**, *37*, 785-789.
9. Grimme, S.; Ehrlich, S.; Goerigk, L., *J. Comput. Chem.* **2011**, *32*, 1456-1465.
10. Grimme, S.; Antony, J.; Ehrlich, S.; Krieg, H., *J. Chem. Phys.* **2010**, *132*, 154104.
11. Barone, V.; Cossi, M., *J. Phys. Chem. A.* **1998**, *102*, 1995-2001.
12. Cossi, M.; Rega, N.; Scalmani, G.; Barone, V., *J. Comput. Chem.* **2003**, *24*, 669-681.
13. Schutz, C. N.; Warshel, A., *Proteins: Struct., Funct., Bioinf.* **2001**, *44*, 400-417.
14. Li, L.; Li, C.; Zhang, Z.; Alexov, E., *J. Chem. Theory Comp.* **2013**, *9*, 2126-2136.

**TableS1.** Primers used in this study

| Primer                   | Sequence of primer (5'-3')                                   |
|--------------------------|--------------------------------------------------------------|
| De-25                    | ATATCATATGGACAAAAACACAAA                                     |
| De-26                    | ATATGTTTAAACCTATATGTCGATATCCACA                              |
| De-20a                   | TGATAATGAAAACCTATAAACTCGTGAAGGCATGTTTAAACCTACTCGCCTGTCTCCAAG |
| De-21a                   | ATCAACTATCAACTATTAACCTATATCGTAATACCATATGCAGGCAGTTTCGATA      |
| Orf12-XW55-F             | ATATATACTAGTATGGATTTCATCAAATACCGGCC                          |
| Orf12-XW55-R             | ATATATCACGTGTCAGTTCTGACCACTCAAATG                            |
| Orf2-2-XW02-R            | ATCAACTATCAACTATTAACCTATATCGTAATACCATATGTCTCAAATACGAGTCTT    |
| Orf2-2-XW02-F            | ATCAACTATCAACTATTAACCTATATCGTAATACCATATGTCTCAAATACGAGTCTT    |
| Orf4-pYTU-F              | GAGCCTGAGCTTCATCCCCAGCATCATTACACCTCAGCATTATGAATTCGGAGGTTTGTG |
| Orf4-pYTU-R              | CTTCAACACAGTGGAGGACATACCCGTAATTTTCTGGGCATGTACCACATGGGTCATCGA |
| A31-Dux-P                | CATTACCCCGCCACATAGACACATCTAAACATTAATTAATGAATTCGGAGGTTTGTGAG  |
| A32-Dux-U                | TCATAGGTCGCCAGGTACGACCAGTTTCGGAAGATCAGGATCGACCAGTGGACCTTTIAG |
| A23-Dux-P                | ATAATAAGCTCTCCCAACTAAAAGGTCCACTGGTCGATCCTGATCTTCCGAACCTGGTCG |
| A24-Dux-P                | TGTAAGGCTTTGATGTACTCTTTTGTGTTTTTGGTCCATTGCTGAGGTGTAATGATGCTG |
| A25-Dux-P                | AGCCTGAGCTTCATCCCCAGCATCATTACACCTCAGCAATGGACCAAAAACACAAAGAG  |
| A26-Dux-P                | TATTGTATATCATTTATAGCTCGTTCCGGCACCTTAATCATATATATACATTTTCGA    |
| A27-Dux-P                | GATGCAAGAAACAACACCGTCGAAAATGTAATATATATGATTAAGGTCGCGAACGAGC   |
| A28-Dux-P                | AAATCCGTAACCCAGGGCTCCAATGACCAGAAATCATAAATGCCTTCTGTGGGGTTTA   |
| A29-Dux-P                | CTCCCTTCTGGAACAATAAACCCACAGAAGGCATTTATGATTTCTGGTCAITGGAGC    |
| A30-Dux-P                | TAAAGGGTATCATCGAAAGGGAGTCATCCAATTTAAATAGACAAGCTACGTGTCTGCTG  |
| A1-Dux-P                 | TCTGAACAATAAACCCACAGAAGGCATTTTAAATTAATGGAGTCAAAAACCTGCCACAA  |
| A2-Dux-P                 | TCATAGGTCGCCAGGTACGACCAGTTTCGGAAGATCAGGGACTCGCGAACTGGACATGAT |
| A3-Dux-P                 | CCCTCTGATGGCCGATCATGTCAGTTTCGCGAGTCCCTGATCTTCCGAACCTGGTCG    |
| A4-Dux-P                 | GTCGGAGCCTCCGCGAAGGCCACAGCTGTGCCCGCCATTGCTGAGGTGTAATGATGCTG  |
| A5-Dux-P                 | AGCCTGAGCTTCATCCCCAGCATCATTACACCTCAGCAATGGCGGGCACAGCTGTGGCC  |
| A6-Dux-P                 | TAGCATCCTGAAATTTACTGGCTGACGACACGCGTTTGTAAAGATAGGTACAGTCAAT   |
| A7-Dux-P                 | ATTCGACTGTACCTATCTTACAACCGCTGTCTGTCAGCCAGTAAATTCAGGATGCTA    |
| A8-Dux-P                 | GATGAGAGCCCAACAACCATGATACCAGGGGATTTAAATGGGTGGTTTACATAGATACAA |
| A35-Dux-U                | CTTCATCCCCAGCATCATTACACCTCAGCATTAATTAATGATTGCAAACAACCGCATT   |
| A36-Dux-U                | GAGGACATACCCGTAATTTTCTGGGCATTTGCGGCCGCGTAACATGTTAATTTGGATGG  |
| <b>For duxA knockout</b> |                                                              |
| AKC Up for               | AGGAGCTCGAACCCGCTCCTTGTACT ( <i>SacI</i> )                   |
| AKC Up rev               | ATCTGCAG CAAGCGAGCATCCAGTTC ( <i>PstI</i> )                  |
| Hph-Up F                 | ATCTGCAG GGAGGTCAACACATCAATG 3( <i>PstI</i> )                |
| Hph-Up R                 | AGAAGCTTGTCTGTCTCCATACAAGCCAAC ( <i>HindIII</i> )            |
| AKC Uko for              | GAACCCGCTCCTTGTACT                                           |
| S2                       | GTCTGCTGCTCCATACAAGCCAAC                                     |
| AKC Dn for               | AGAAGCTTTCGGAGGGCGAAGAATCTCGT ( <i>HindIII</i> )             |
| AKC Dn rev               | ATCTGCAG AAATTGACGCTTAGACAACCT ( <i>PstI</i> )               |
| Hph-Dn F                 | ATCTGCAG ATTGGGCAGATAGAAGAC ( <i>PstI</i> )                  |
| Hph-Dn R                 | ACGAATTC ACTCGGGATGTTGTAC ( <i>EcoRI</i> )                   |
| S3                       | TCGGAGGGCGAAGAATCTCGT                                        |
| AKC Dko rev              | ACTCGGGATGTTGTAC                                             |
| Check LsA for            | GCCTCGTTGTTGCTTGTGTA                                         |
| Check LsA rev            | ACTGGCGTCGGTCTCATT                                           |
| Check RsA for            | CGACAGCCGAGAACAAG                                            |
| Check RsA rev            | TCAAAACCGGAGAGAATG                                           |
| Check hph for            | TCGGAGGGCGAAGAATCTCG                                         |
| Check hph rev            | GTTGGCTTGTATGGAGCAGCAGAC                                     |
| <b>For duxD knockout</b> |                                                              |
| DKC Up for               | ATATAI CCCGGGATATCTTTGTGCAACAGAAT                            |
| DKC Up rev               | CTATACGACTTTGATGGTCTGTTAGCGGCCGCTATACGGTTCATCTGATAT          |
| Hph-Up for               | TATATCAGATGAACCGTAATAGCGGCCGCTACAACGACCATCAAAGTCGTATAG       |
| Hph-Up rev               | GGAACAAAAGCTGGAGCTCCACCGCGGTACCGTCTGTGCTCCATACAAGCCAAC       |
| DKC Uko for              | ATATCTTGTGCAACAGAAT                                          |
| S2                       | GTCTGCTGCTCCATACAAGCCAAC                                     |
| AKC Dn for               | TTCCCAATACGTATTGGGAATTCCTGCAGCCCGGGCTTCTCTGACCACGTGGAA       |
| AKC Dn rev               | CAGGTACACTTGTTTAGAGGTAATCTGCGGCCGATGAAGAGAAAATACCGGAT        |
| Hph-Dn for               | ATCCGGTATTTCTCTTCATGCGGCCGAGGATACCTTAAACAAGTGTACCTG          |
| Hph-Dn rev               | TCACTAAAGGGAACAAAAGCTGGAGCTCGGTACCTCGGAGGGCGAAGAATCTCGT      |
| S3                       | TCGGAGGGCGAAGAATCTCGT                                        |
| AKC Dko rev              | CTCTTCTGACCACGTGGAA                                          |
| Check LsD for            | CGGAATCTCATCGCCCTT                                           |
| Check LsD rev            | CCACGAGTAGTCCCCGAG                                           |
| Check RsD for            | AAATTGAACCAACGAACA                                           |
| Check RsD rev            | CCCCAGCATCCACTCTAA                                           |
| <b>For duxG knockout</b> |                                                              |
| GKC Up for               | GCCCCCTCGAGGTGACGGTATCGATAAGCTTTCAGACGGAGACGATCCTC           |
| GKC Up rev               | GGTCTGTTAGCGCCGCGCATTTGCCATGTAGCTGCCTACATTGCCTCCAGC          |
| Hph-Up for               | GCTGGAGCAATGTAGGCAGTCATGGCAAATGCGCGGCCGCTACAACGACC           |
| Hph-Up rev               | TAAAGGGAACAAAAGCTGGAGCTCCACCGCGTACCGTCTGCTGCTCCATACAA        |
| GKC Uko for              | TCAGACGGAGACGATCCTC                                          |

|                                 |                                                           |
|---------------------------------|-----------------------------------------------------------|
| S2                              | GTCTGCTGCTCCATACAAGCCAAC                                  |
| GKC Dn for                      | ATCTGCAG GCTGGCAATTTGAGGAC ( <i>PstI</i> )                |
| GKC Dn rev                      | AGAAGCTT ACGACCCCATGAGTATT ( <i>HindIII</i> )             |
| Hph-Dn for                      | ACGAATTC TCGGAGGGCGAAGAATCTCGT ( <i>EcoRI</i> )           |
| Hph-Dn rev                      | ATCTGCAG AAATTGACGCTTAGACAACCT ( <i>PstI</i> )            |
| S3                              | TCGGAGGGCGAAGAATCTCGT                                     |
| AKC Gko rev                     | ACGACCCCATGAGTATT                                         |
| Check LsG for                   | CGGTTTCCCATTTTTCAC                                        |
| Check LsG rev                   | GGGGAATAGCCACTGAGA                                        |
| <b>For <i>duxH</i> knockout</b> |                                                           |
| HKC Up for                      | CGGGCCCCCTCGAGGTCGACGGTATCGATAAGCTTTCAGACGGAGACGATCCTC    |
| HKC Up rev                      | GGTCGTTGTAGCGGCCGCGGCATTTGCCATGTAGCTGCCTACATTGCCTCCAGC    |
| Hph-Up for                      | GCTGGAGGCAATGTAGGCAGCTACATGGCAAATGCCGCGGCCGTACAACGACC     |
| Hph-Up rev                      | TAAAGGGAACAAAAGCTGGAGCTCCACCGCGTACCCTGCTGCTCCATACA        |
| HKC Uko for                     | TCAGACGGAGACGATCCTC                                       |
| S2                              | GTCTGCTGCTCCATACAAGCCAAC                                  |
| HKC Dn for                      | ATCTGCAG GCTGGCAATTTGAGGAC ( <i>PstI</i> )                |
| HKC Dn rev                      | AGAAGCTT ACGACCCCATGAGTATT ( <i>HindIII</i> )             |
| Hph-Dn for                      | ACGAATTC TCGGAGGGCGAAGAATCTCGT ( <i>EcoRI</i> )           |
| Hph-Dn rev                      | ATCTGCAG AAATTGACGCTTAGACAACCT ( <i>PstI</i> )            |
| S3                              | TCGGAGGGCGAAGAATCTCGT                                     |
| HKC Gko rev                     | ACGACCCCATGAGTATT                                         |
| Check LsH for                   | ATGCCATTTGCTGATC                                          |
| Check LsH rev                   | ACGTTGCGAAGACCTGAC                                        |
| Check RsH for                   | TCGTCACCGTTGGAATC                                         |
| Check RsH rev                   | AAGGGGAAACAGGAACT                                         |
| <b>For <i>duxI</i> knockout</b> |                                                           |
| IKC Up for                      | ACGAATTC CGGTTTGTATGGTTAG ( <i>EcoRI</i> )                |
| IKC Up rev                      | ATCTGCAG GGTCCGTTATCTAGGC ( <i>PstI</i> )                 |
| Hph-Up for                      | ATCTGCAG GGAGGTCAACACATCAATG ( <i>PstI</i> )              |
| Hph-Up rev                      | AGAAGCTTGTCTGTCTCCATACAAGCCAAC ( <i>HindIII</i> )         |
| IKC Uko for                     | CGGTTTGTATGGTTAG                                          |
| S2                              | GTCTGCTGCTCCATACAAGCCAAC                                  |
| IKC Dn for                      | ACGAATTC TCGGAGGGCGAAGAATCTCGT ( <i>EcoRI</i> )           |
| IKC Dn rev                      | ATCTGCAG AAATTGACGCTTAGACAACCT ( <i>PstI</i> )            |
| Hph-Dn for                      | ATCTGCAG AAAAGGAGCGAGTTCATG ( <i>PstI</i> )               |
| Hph-Dn rev                      | AGAAGCTTATGCGAAGTTACCGCTGT ( <i>HindIII</i> )             |
| S3                              | TCGGAGGGCGAAGAATCTCGT                                     |
| IKC Gko rev                     | ATGCGAAGTTACGGCTGT                                        |
| Check LsI for                   | CGCTGGCAATTTGAGGA                                         |
| Check LsI rev                   | GTCCGAGTCAACCTCTA                                         |
| Check RsI for                   | GAGGGCTGCGTTGTCTTT                                        |
| Check RsI rev                   | TGTTGAGCCGCAATTA                                          |
| <b>For <i>duxJ</i> knockout</b> |                                                           |
| JKC Up for                      | GGGCCCCCTCGAGGTCGACGGTATCGATAAGCTTACTCAGATTATTAGTAGAT     |
| JKC Up rev                      | TGGTAGCTATACGACTTTGATGGTCGTTGTAGCGGCCGACGATGAAGACCTTGAGCC |
| Hph-Up for                      | CGTCCAAGTCTTTCATCGTGGCCGCTACAACGACCATCAAAGTCTATAGCTACCA   |
| Hph-Up rev                      | TAAAGGGAACAAAAGCTGGAGCTCCACCGCGTACCCTGCTGCTCCATACAAGCCAAC |
| JKC Uko for                     | ACTCAGATTATTAGTAGAT                                       |
| S2                              | GTCTGCTGCTCCATACAAGCCAAC                                  |
| JKC Dn for                      | ATCTGCAG AGCAAGGACGAAGTACCC ( <i>PstI</i> )               |
| JKC Dn rev                      | AGAAGCTTAGCACACCCGTCACGATAG ( <i>HindIII</i> )            |
| Hph-Dn for                      | ACGAATTC TCGGAGGGCGAAGAATCTCGT ( <i>EcoRI</i> )           |
| Hph-Dn rev                      | ATCTGCAG AAATTGACGCTTAGACAACCT ( <i>PstI</i> )            |
| S3                              | TCGGAGGGCGAAGAATCTCGT                                     |
| JKC Gko rev                     | AGCACACCGTCACGATAG                                        |
| Check LsJ for                   | TTACCTTTGCGCTGTTGA                                        |
| Check LsJ rev                   | ACCGCCACCGAGAGATAG                                        |
| Check RsJ for                   | GGAATGGGCTGTACAC                                          |
| Check RsJ rev                   | CGTCGGTATGAGATTCC                                         |
| <b>For <i>duxL</i> knockout</b> |                                                           |
| LKC Up for                      | TTCCCAATACGTATTGGGAATTCCTGCAGCCCGGGTGACTATCGATCAGCTAGCC   |
| LKC Up rev                      | GCTATACGACTTTGATGGTCGTTGTAGCGGCCGCTGGCATTGGTTGATCGATTCA   |
| Hph-Up for                      | TGAATCGATCAACCAATGCCAGCGGCCGCTACAACGACCATCAAAGTCTATAGC    |
| Hph-Up rev                      | GGAAACAAAAGCTGGAGCTCCACCGCGTACCCTGCTGCTCCATACAAGCCAAC     |
| LKC Uko for                     | TGACTATCGATCAGCTAGCC                                      |
| S2                              | GTCTGCTGCTCCATACAAGCCAAC                                  |
| LKC Dn for                      | ATTCCAATACGTATTGGGAATTCCTGCAGCCCGGGTGATCTTACATCTGTTT      |
| LKC Dn rev                      | CACAGGTACTTGTAGAGGTAATCCTGCGGCCGCTGGCTTTCAGAATCAGAT       |
| Hph-Dn for                      | ATCTGATTCTGAAAGCCAGCGCCGAGGATTACCTCTAAACAAGTGACCTGTG      |
| Hph-Dn rev                      | TCACTAAAGGGAACAAAAGCTGGAGCTCGGTACCTCGGAGGGCGAAGAATCTCGT   |
| S3                              | TCGGAGGGCGAAGAATCTCGT                                     |
| LKC Gko rev                     | GTGTATCTTACATCTGTTT                                       |
| Check LsL for                   | TCAAAACGAACGCCTTAG                                        |
| Check LsL rev                   | TCTCCACGCAGGCATATT                                        |
| Check RsL for                   | GAGCGATGCGGACAAATG                                        |

|                                                           |                                                              |
|-----------------------------------------------------------|--------------------------------------------------------------|
| Check RsL rev                                             | TGGCCGTTGTTCTTCTTAAT                                         |
| <b>For <i>duxM</i> knockout</b>                           |                                                              |
| MKC Up for                                                | GGGCCCCCCTCGAGGTGACGGTATCGATAAGCTTGCCATCTCTATGATCCCA         |
| MKC Up rev                                                | TGTAGCGGCCGCTCTAGAAGTGTGGATCCCCGGGCTTGAAAAAGTCAATGATC        |
| Hph-Up for                                                | GATCATTGACTTTTTCAAGCCCGGGGATCCACTAGTTCTAGAGCGGCCGTACA        |
| Hph-Up rev                                                | GGAAACAAAAGCTGGAGCTCCACCGCGGTACCGTCTGTGCTCCATACAAGCCAAC      |
| MKC Uko for                                               | GCCATCTCTTATGATCCCA                                          |
| S2                                                        | GTCTGCTGCTCCATACAAGCCAAC                                     |
| MKC Dn for                                                | CAGGTACACTTGTTTAGAGGTAATCTGCGGCCGCGATGAAGATACCATCATGAA       |
| MKC Dn rev                                                | TTCCCAATACGTATTGGGAATTCCTGCAGCCCGGGATCGGGGCAAGACATGGAGC      |
| Hph-Dn for                                                | TCACTAAAGGGAACAAAAGCTGGAGCTCGGTACCTCGGAGGGCGAAGAATCTCGT      |
| Hph-Dn rev                                                | TTCATGATGGTATCTTCATCGCGCCGAGGATTACCTCTAAACAAGTGACCTG         |
| S3                                                        | TCGGAGGGCGAAGAATCTCGT                                        |
| MKC Gko rev                                               | ATCGGGGCAAGACATGGAGC                                         |
| Check LsM for                                             | TAGGAACCCGCCCGTGTGTC                                         |
| Check LsM rev                                             | TGCCCAATCTCCGCCAT                                            |
| Check RsM for                                             | GAGGGGCCGGTATTTTCAT                                          |
| Check RsM rev                                             | ATCCAAGCGTCATCAATG                                           |
| <b>For <i>DuxI</i> expression in <i>S. cerevisiae</i></b> |                                                              |
| <i>duxI</i> -S1 for                                       | AACTATTAACATAATCGTAATACCATCATATGGCGGGCACAGCTGTGGCCTTCGCGGAG  |
| <i>duxI</i> -S1 rev                                       | CGACATTGTTTTGAAGGCTGATTAAGCAGCCTATCTCACAGCCACTGC             |
| <i>duxI</i> -S2 for                                       | GCAGTGGCTGTGAGATAGGCTGCTTTAATCAGCCTTCAAACAATGTGC             |
| <i>duxI</i> -S2 rev                                       | ATGGAAACTATAAATCGTGAAGGCATGTTTAAACTCATGCTAATGCCCGGTGAAGGAAAC |
| <b>Primers used for RT-PCR</b>                            |                                                              |
| <i>duxA</i> for                                           | ATGTTTATCAAGACCCAATG                                         |
| <i>duxA</i> Rev                                           | CTTCTGTACTATCTCCTCCACT                                       |
| <i>duxB</i> for                                           | GTGCGATTGGACTGAAAG                                           |
| <i>duxB</i> Rev                                           | GAGCCATAGAAAGCGGTA                                           |
| <i>duxC</i> for                                           | TCTAACATGCGAAACAAAC                                          |
| <i>duxC</i> Rev                                           | TGGAATGAGGCTGAGGTA                                           |
| <i>duxD</i> for                                           | CATACCCGACAAAGACGC                                           |
| <i>duxD</i> Rev                                           | TCAATCACTTCGCCACCC                                           |
| <i>duxE</i> for                                           | TACCATACGCCAAGGGAC                                           |
| <i>duxE</i> Rev                                           | CCATTGCGGAATACAGGA                                           |
| <i>duxF</i> for                                           | CGCGAGTCTACTGTCTAA                                           |
| <i>duxF</i> Rev                                           | AAACAGTTCTCCATTG                                             |
| <i>duxG</i> for                                           | ATAACAGCCAGAGCAACTT                                          |
| <i>duxG</i> Rev                                           | CTTCGTAATGGTCCAATCT                                          |
| <i>duxH</i> for                                           | ACTGTTATACGGGATTCTTA                                         |
| <i>duxH</i> Rev                                           | GTCTCCTTCTCAACAAA                                            |
| <i>duxI</i> for                                           | GGCAGTGGCTGTGAGATA                                           |
| <i>duxI</i> Rev                                           | CCCTTAGTGAGGCAGAAAT                                          |
| <i>duxJ</i> for                                           | ACTTGACAATACCGACTACCT                                        |
| <i>duxJ</i> Rev                                           | ACCTTTGAACCGCTCTTA                                           |
| <i>duxK</i> for                                           | AGATACTGCCAAACCACTG                                          |
| <i>duxK</i> Rev                                           | GTCCACCAATCTCCACAA                                           |
| <i>duxL</i> for                                           | TCGCTCACAAATGAAGTCG                                          |
| <i>duxL</i> Rev                                           | GATAAGATACAATCCACCAAGT                                       |
| <i>duxM</i> for                                           | GGCCACGTTTCGACCAGAT                                          |
| <i>duxM</i> Rev                                           | TCCCATTGGCCTTGCTTT                                           |
| <i>orf14</i> for                                          | CAAGAACCCTGGGCACG                                            |
| <i>orf14</i> Rev                                          | CGACGGTTGATCGTTTGG                                           |
| <i>orf15</i> for                                          | TGCTACAGGTTGTTTCGTG                                          |
| <i>orf15</i> Rev                                          | ATGTTTGTGCGGTATCTT                                           |
| <i>duxN</i> for                                           | GCTGTGTCCAGTACTT                                             |
| <i>duxN</i> Rev                                           | CACTGGCAGCGTGAATAG                                           |
| <i>duxA'</i> for                                          | GTGGACTGCGTGTCTG                                             |
| <i>duxA'</i> Rev                                          | TCTGCAAAGAGGCGCCCA                                           |
| <i>duxB'</i> for                                          | GTCTCGCAATCAACCTC                                            |
| <i>duxB'</i> Rev                                          | CAGCCTAGTATGACGTAT                                           |
| <i>duxC'</i> for                                          | ACAAGCCCAATGATGAC                                            |
| <i>duxC'</i> Rev                                          | AGAAGTGCCATTTCCGAT                                           |
| <i>duxD'</i> for                                          | CGACAAAGACGCCTGCTC                                           |
| <i>duxD'</i> Rev                                          | TAACAGGTGCGTCGTAAT                                           |
| <i>duxG'</i> for                                          | AGACGGGCAACACACTG                                            |
| <i>duxG'</i> Rev                                          | TGGATTGGGAGGCTTAGA                                           |
| <i>duxI'</i> for                                          | GGCATCTGAAACTCCTAAA                                          |
| <i>duxI'</i> Rev                                          | CTCGCTTGGCTCATCCTT                                           |
| <i>duxL'</i> for                                          | GCCGCAGCTACGAAGGAT                                           |
| <i>duxL'</i> Rev                                          | ATCTGCCACTTCCATCTC                                           |
| <i>duxM'</i> for                                          | GCAATACCTTTACAGAAT                                           |
| <i>duxM'</i> Rev                                          | TGTCAACTCCATCGTCTC                                           |
| <i>duxN'</i> for                                          | GCTTGGCAGTCACTTTCC                                           |
| <i>duxN'</i> Rev                                          | TTTTTCTTCAGCCACAAA                                           |
| <i>duxO</i> for                                           | GTCTGTGCTTTTCATATA                                           |
| <i>duxO</i> Rev                                           | GCCCAGCTGTGATTGCC                                            |

**Table S2.** Deduced functions of the ORFs in *dux* gene cluster

| <b>Gene</b>  | <b>putative function</b>                        | <b>coverage/identity</b> | <b>Organism</b>                          | <b>Accession no.</b> |
|--------------|-------------------------------------------------|--------------------------|------------------------------------------|----------------------|
| <i>duxA</i>  | aldo/keto reductase, putative                   | 100/79                   | <i>Talaromyces marneffei</i> ATCC 18224  | XP_002145784.1       |
| <i>duxB</i>  | FAD dependent oxidoreductase, putative          | 80/35                    | <i>Aspergillus flavus</i> NRRL3357       | XP_002383905.1       |
| <i>duxC</i>  | C6 transcription factor, putative               | 100/72                   | <i>Talaromyces marneffei</i> ATCC 18224  | XP_002145786.1       |
| <i>duxD</i>  | benzoate 4-monooxygenase cytochrome P450        | 99/83                    | <i>Talaromyces marneffei</i> ATCC 18224  | XP_002145787.1       |
| <i>duxE</i>  | monooxygenase, putative (PhnB)                  | 93/68                    | <i>Penicillium herquei</i> NRRL1040      | AMP46752.1           |
| <i>duxF</i>  | conserved hypothetical protein (PhnD)           | 96/42                    | <i>Penicillium herquei</i> NRRL1040      | AMP46754.1           |
| <i>duxG</i>  | putative isoflavone reductase family protein    | 99/83                    | <i>Talaromyces marneffei</i> ATCC 18224  | XP_002145790.1       |
| <i>duxH</i>  | dienelactone hydrolase, putative                | 97/72                    | <i>Talaromyces marneffei</i> ATCC 18224  | XP_002145791.1       |
| <i>duxI</i>  | polyketide synthase, putative (PhnA)            | 98/49                    | <i>Penicillium herquei</i> NRRL1040      | AMP46751.1           |
| <i>duxJ</i>  | Maleylacetate reductase, putative               | 94/80                    | <i>Talaromyces marneffei</i> ATCC 18224  | XP_002145793.1       |
| <i>duxK</i>  | O-methyltransferase, putative (PhnC)            | 94/38                    | <i>Penicillium herquei</i> NRRL1040      | AMP46753.1           |
| <i>duxL</i>  | cytochrome P450, putative                       | 99/76                    | <i>Talaromyces marneffei</i> ATCC 18224  | XP_002145795.1       |
| <i>duxM</i>  | conserved hypothetical protein (cupin-2 family) | 100/92                   | <i>Talaromyces marneffei</i> ATCC 18224  | XP_002145796.1       |
| <i>duxN</i>  | MFS multidrug transporter                       | 99/78                    | <i>Talaromyces marneffei</i> PM1         | XP_002145783.1       |
| <i>duxA'</i> | aldo/keto reductase, putative                   | 100/86                   | <i>Talaromyces marneffei</i> ATCC 18224  | XP_002145784.1       |
| <i>duxB'</i> | NAD/FAD dependent oxidoreductase, putative      | 97/85                    | <i>Talaromyces stipitatus</i> ATCC 10500 | XP_002478054.1       |
| <i>duxC'</i> | C6 transcription factor, putative               | 94/81                    | <i>Talaromyces stipitatus</i> ATCC 10500 | XP_002478055.1       |
| <i>duxD'</i> | benzoate 4-monooxygenase cytochrome P450        | 99/76                    | <i>Talaromyces stipitatus</i> ATCC 10500 | XP_002478056.1       |
| <i>duxG'</i> | isoflavone reductase family protein (CipA)      | 98/90                    | <i>Talaromyces stipitatus</i> ATCC 10500 | XP_002478059.1       |
| <i>duxH'</i> | dienelactone hydrolase                          | 100/70                   | <i>Talaromyces stipitatus</i> ATCC 10500 | XP_002478061.1       |
| <i>duxI'</i> | polyketide synthase, putative                   | 16/69                    | <i>Talaromyces stipitatus</i> ATCC 10500 | XP_002478062.1       |
| <i>duxL'</i> | cytochrome P450, putative                       | 100/87                   | <i>Talaromyces stipitatus</i> ATCC 10500 | XP_002478065.1       |
| <i>duxM'</i> | conserved hypothetical protein (cupin-2 family) | 100/90                   | <i>Talaromyces stipitatus</i> ATCC 10500 | XP_002478066.1       |
| <i>duxO</i>  | trichothecene 3-O-acetyltransferase, putative   | 94/25                    | <i>Talaromyces marneffei</i> ATCC 18224  | XP_002149771.1       |

**Table S3.** *Saccharomyces cerevisiae* and *Aspergillus nidulans* strains used in this study

| <b>Genotype Description</b>                       | <b>Description</b>                                                             |
|---------------------------------------------------|--------------------------------------------------------------------------------|
| Yeast+PhnA+PhnB                                   | <i>S. cerevisiae</i> BJ5464-NpgA + pGSS1 + pGSS4                               |
| Yeast+PhnA+PhnB+DuxM                              | <i>S. cerevisiae</i> BJ5464-NpgA + pGSS1 + pGSS4 + pGSS41                      |
| Yeast+PhnA+PhnB+DuxM+DuxJ                         | <i>S. cerevisiae</i> BJ5464-NpgA + pGSS14 + pGSS49 + pGSS40                    |
| Yeast+DuxL                                        | <i>S. cerevisiae</i> BJ5464-NpgA + pGSS92                                      |
| Yeast+DuxB'                                       | <i>S. cerevisiae</i> BJ5464-NpgA + pGSS117                                     |
| Yeast+DuxI                                        | <i>S. cerevisiae</i> BJ5464-NpgA + <i>duxI</i>                                 |
| <i>A. nidulans</i> +DuxD                          | <i>A. nidulans</i> A1145 $\Delta$ ST $\Delta$ EM + pGSS119                     |
| <i>A. nidulans</i> +DuxI+DuxE+DuxM+DuxJ+DuxD      | <i>A. nidulans</i> A1145 $\Delta$ ST $\Delta$ EM + pGSS100 + pGSS101           |
| <i>A. nidulans</i> +DuxI+DuxE+DuxM+DuxJ+DuxD+DuxG | <i>A. nidulans</i> A1145 $\Delta$ ST $\Delta$ EM + pGSS100 + pGSS101 + pGSS102 |

**Table S4.**  $^1\text{H}$  NMR (500 MHz) and  $^{13}\text{C}$  NMR (125 MHz) data of compound **12** in acetone- $d_6$ .

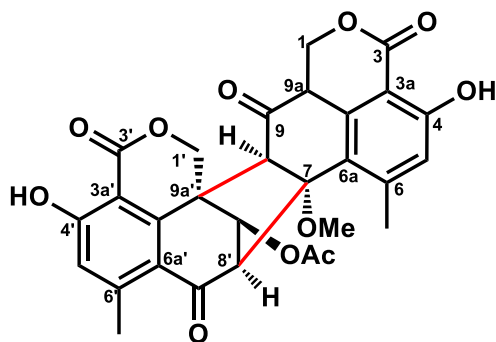

| <b>12</b>        |                                          |                     |                    |                                          |                     |
|------------------|------------------------------------------|---------------------|--------------------|------------------------------------------|---------------------|
|                  | $\delta_{\text{H}}$ ( <i>J</i> in Hz)    | $\delta_{\text{C}}$ |                    | $\delta_{\text{H}}$ ( <i>J</i> in Hz)    | $\delta_{\text{C}}$ |
| 1                | 5.05 (1H, d, 13.7)<br>4.79 (1H, d, 13.7) | 64.52               | 1'                 | 5.21 (1H, d, 12.3)<br>5.06 (1H, d, 12.3) | 70.66               |
| 2                |                                          |                     | 2'                 |                                          |                     |
| 3                |                                          | 169.63              | 3'                 |                                          | 168.08              |
| 3a               |                                          | 100.64              | 3a'                |                                          | 105.08              |
| 3b               |                                          | 137.05              | 3b'                |                                          | 144.48              |
| 4                |                                          | 161.75              | 4'                 |                                          | 164.10              |
| 5                | 6.46 (1H, s)                             | 116.44              | 5'                 | 6.65 (1H, s)                             | 119.76              |
| 6                |                                          | 148.15              | 6'                 |                                          | 150.44              |
| 6a               |                                          | 117.78              | 6a'                |                                          | 121.53              |
| 7                |                                          | 86.83               | 7'                 |                                          | 191.35              |
| 8                | 4.00 (1H, brs)                           | 56.66               | 8'                 | 4.13 (1H, brs)                           | 68.23               |
| 9                |                                          | 149.79              | 9'                 | 5.16 (1H, brs)                           | 76.76               |
| 9a               |                                          | 99.83               | 9a'                |                                          | 52.03               |
| 10               | 2.55 (3H, s)                             | 20.56               | 10                 | 2.03 (3H, s)                             | 21.07               |
| OCH <sub>3</sub> | 2.94 (3H, s)                             | 50.30               | OCOCH <sub>3</sub> | 2.16 (3H, s)                             | 20.01               |
|                  |                                          |                     | OCOCH <sub>3</sub> |                                          | 169.41              |

**Table S5.**  $^1\text{H}$  NMR (500 MHz) and  $^{13}\text{C}$  NMR (125 MHz) data of compound **10** in  $\text{DMSO-}d_6$

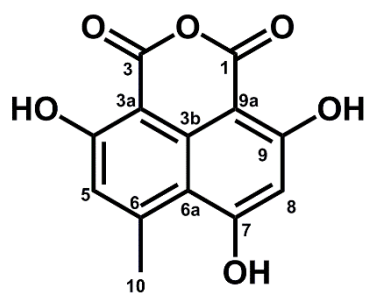

| Position | <b>10</b>                     |                     |
|----------|-------------------------------|---------------------|
|          | $\delta_{\text{H}}$ (J in Hz) | $\delta_{\text{C}}$ |
| 1        |                               | 167.63              |
| 2        |                               |                     |
| 3        |                               | 164.49              |
| 3a       |                               | 98.19               |
| 3b       |                               | 136.47              |
| 4        |                               | 164.73              |
| 5        | 6.90 (1H, s)                  | 117.75              |
| 6        |                               | 150.48              |
| 6a       |                               | 112.06              |
| 7        |                               | 163.82              |
| 8        | 6.44 (1H, s)                  | 99.94               |
| 9        |                               | 166.87              |
| 9a       |                               | 92.38               |
| 10       | 2.79 (3H, s)                  | 25.41               |



**Table S6.**  $^1\text{H}$  NMR (500 MHz) and  $^{13}\text{C}$  NMR (125 MHz) data of compound **13** in  $\text{DMSO-}d_6$

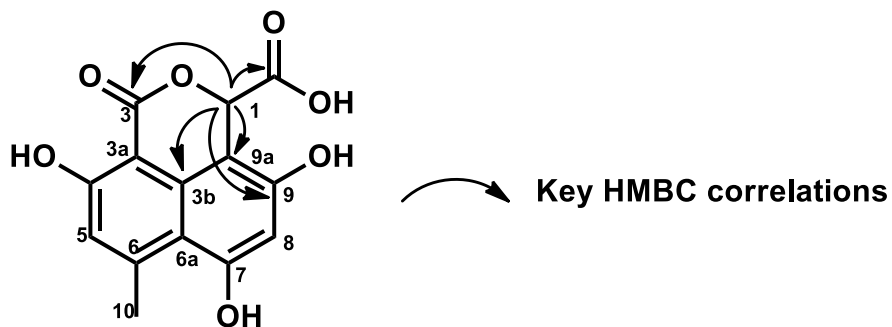

| Position | <b>13</b>                     |                     |
|----------|-------------------------------|---------------------|
|          | $\delta_{\text{H}}$ (J in Hz) | $\delta_{\text{C}}$ |
| 1        | 6.18 (1H, brs)                | 74.52               |
| 2        |                               |                     |
| 3        |                               | 170.79              |
| 3a       |                               | 97.63               |
| 3b       |                               | 132.77              |
| 4        |                               | 162.34              |
| 5        | 6.63 (1H, s)                  | 116.36              |
| 6        |                               | 148.09              |
| 6a       |                               | 112.01              |
| 7        |                               | 158.56              |
| 8        | 6.48 (1H, s)                  | 100.24              |
| 9        |                               | 155.09              |
| 9a       |                               | 97.13               |
| 10       | 2.72 (3H, brs)                | 25.26               |
| COOH     |                               | 170.11              |

Table S7.  $^1\text{H}$  NMR (500 MHz) and  $^{13}\text{C}$  NMR (125 MHz) data of compound **14** in  $\text{DMSO-}d_6$

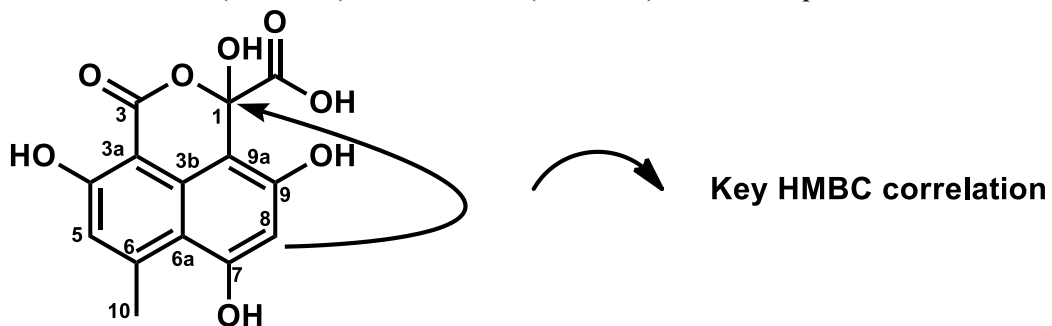

| Position | <b>14</b>                     |                     |
|----------|-------------------------------|---------------------|
|          | $\delta_{\text{H}}$ (J in Hz) | $\delta_{\text{C}}$ |
| 1        |                               | 100.27              |
| 2        |                               |                     |
| 3        |                               | 168.88              |
| 3a       |                               | 95.88               |
| 3b       |                               | 132.41              |
| 4        |                               | 163.22              |
| 5        | 6.66 (1H, s)                  | 116.00              |
| 6        |                               | 148.76              |
| 6a       |                               | 111.44              |
| 7        |                               | 159.12              |
| 8        | 6.45 (1H, s)                  | 99.85               |
| 9        |                               | 156.09              |
| 9a       |                               | 101.81              |
| 10       | 2.77 (3H, s)                  | 25.61               |
| COOH     |                               | 169.29              |
| 4-OH     | 11.92 (1H, s)                 |                     |
| 7-OH     | 10.51 (1H, s)                 |                     |

**Table S8.**  $^1\text{H}$  NMR (500 MHz) and  $^{13}\text{C}$  NMR (125 MHz) data of compound **11** in  $\text{DMSO-}d_6$

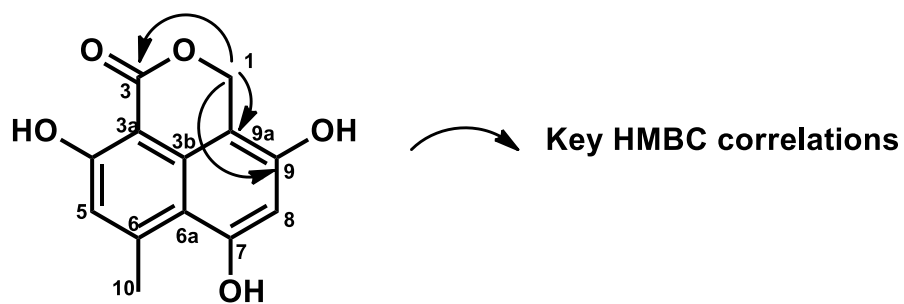

| Position | <b>11</b>                     |                     |
|----------|-------------------------------|---------------------|
|          | $\delta_{\text{H}}$ (J in Hz) | $\delta_{\text{C}}$ |
| 1        | 4.75 (2H, s)                  | 58.93               |
| 2        |                               |                     |
| 3        |                               | 162.84              |
| 3a       |                               | 88.02               |
| 3b       |                               | 124.66              |
| 4        |                               | 154.68              |
| 5        | 5.73 (1H, s)                  | 107.71              |
| 6        |                               | 140.08              |
| 6a       |                               | 103.75              |
| 7        |                               | 147.26              |
| 8        | 5.55 (1H, s)                  | 90.73               |
| 9        |                               | 144.67              |
| 9a       |                               | 89.91               |
| 10       | 1.96 (3H, s)                  | 16.04               |

**Table S9.** ICP-MS measurement results of FLAG-tagged DuxM.

|        | Li    | Mg    | Al    | Mn    | Co    | Ni    | Cu    | Zn    | Ba    | Pb    | Fe   | Ti    | unit  |
|--------|-------|-------|-------|-------|-------|-------|-------|-------|-------|-------|------|-------|-------|
| Sample | 3.829 | 14.78 | 21.38 | 24.39 | 2.961 | 22.95 | 16.19 | 896.8 | 2.766 | 7.648 | 1809 | 4.767 | ng/mL |

\* The DuxM concentration is ~48  $\mu$ M.

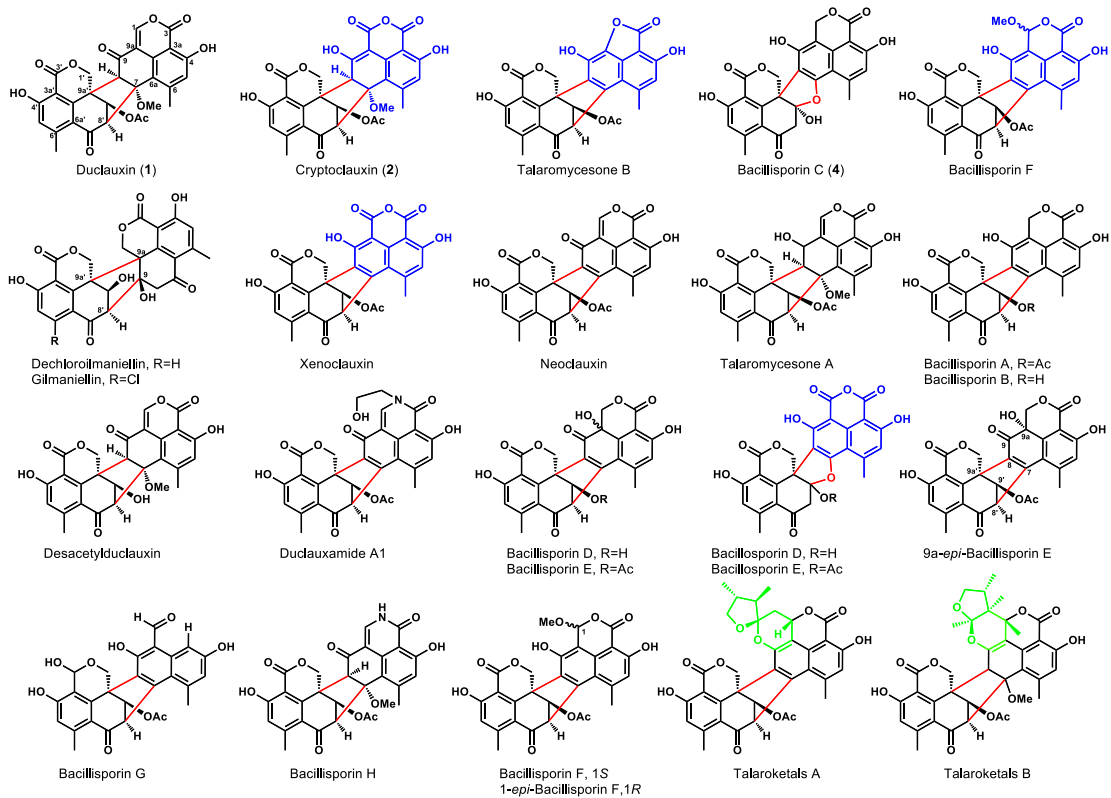

**Figure S1.** Natural products of duclauxins family from different fungi.

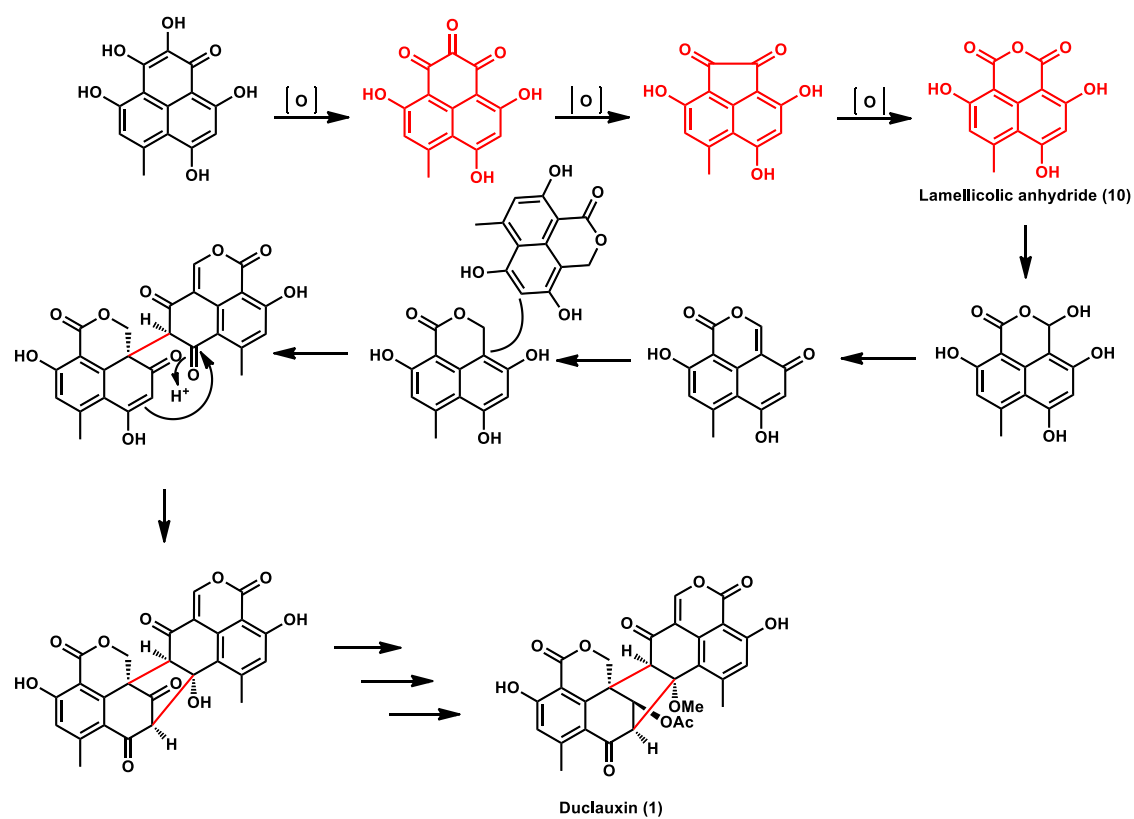

**Figure S2.** Proposed biosynthetic pathway for duclauxin **1**: *via* a tri-keto, a di-keto and a hydride intermediates (marked in red).

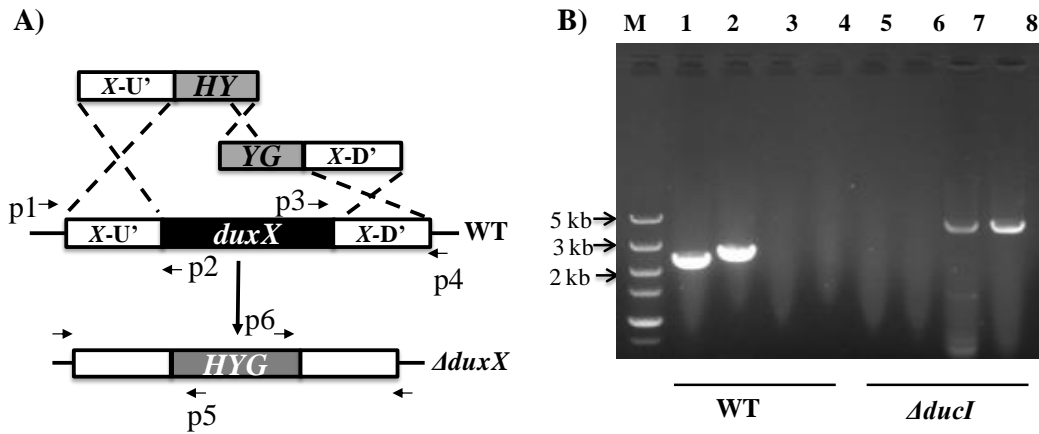

**Figure S3.** Gene knock-out of *dux* gene cluster in *T. stipitatus* and PCR verification of mutant. A) The method for PCR check of the mutant used in this study. *duxX* represents the target gene; 1 represents the fragment amplified by the primer pair of 1 (check X for) and p2 (check inX rev); 2 represents the fragment amplified by the primer pair of p3 (check X rev) and p4 (check inX for); 7 represents the fragment amplified by the primer pair of p1 (check X for) and p5 (check hph rev); 8 represents the fragment amplified by the primer pair of p4 (check X rev) and p6 (check hph for). The primers are shown in Table S1. B) PCR check the  $\Delta duxI$  obtained in this study.

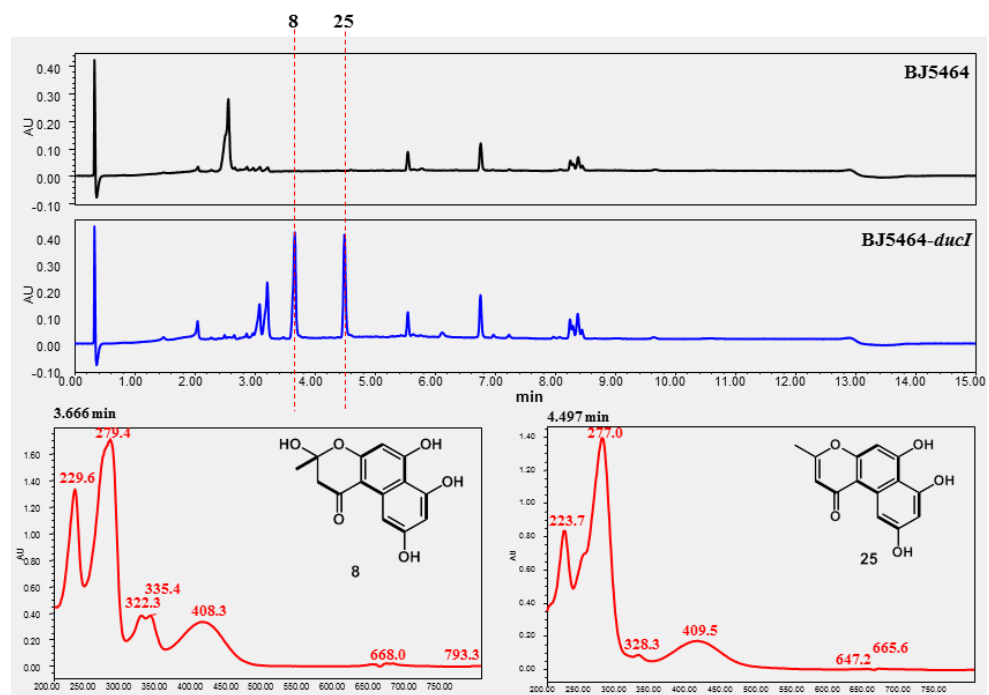

**Figure S4.** LC-MS analysis of heterologous expression of DuxI in *Saccharomyces cerevisiae* BJ5464. Compounds **8** (MW=276) and **25** (MW=258) are the same products to those characterized by expressing PhnA of *phn* gene cluster in *Penicillium herquei* NRRL 1040 in yeast.



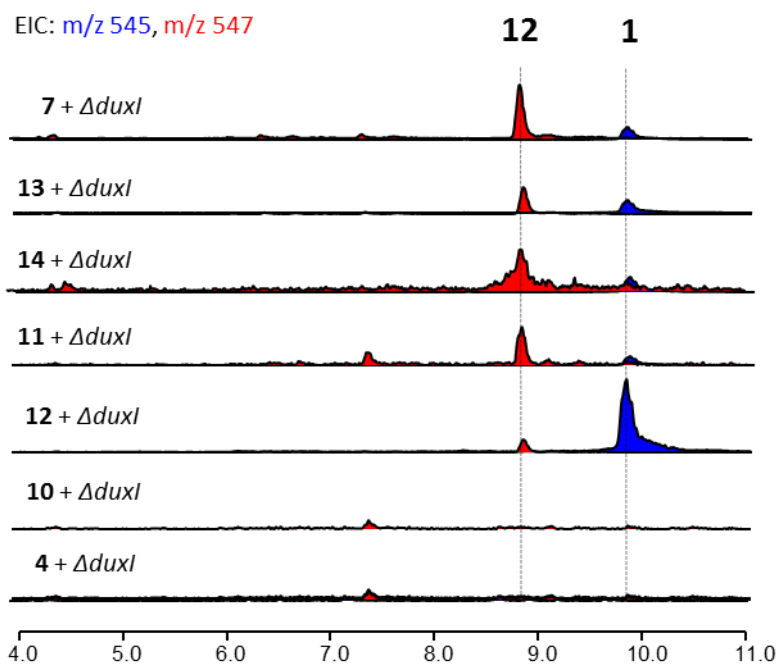

**Figure S5.** Product profiles of chemical complementation studies to  $\Delta duxI$  of *T. stipitatus*.

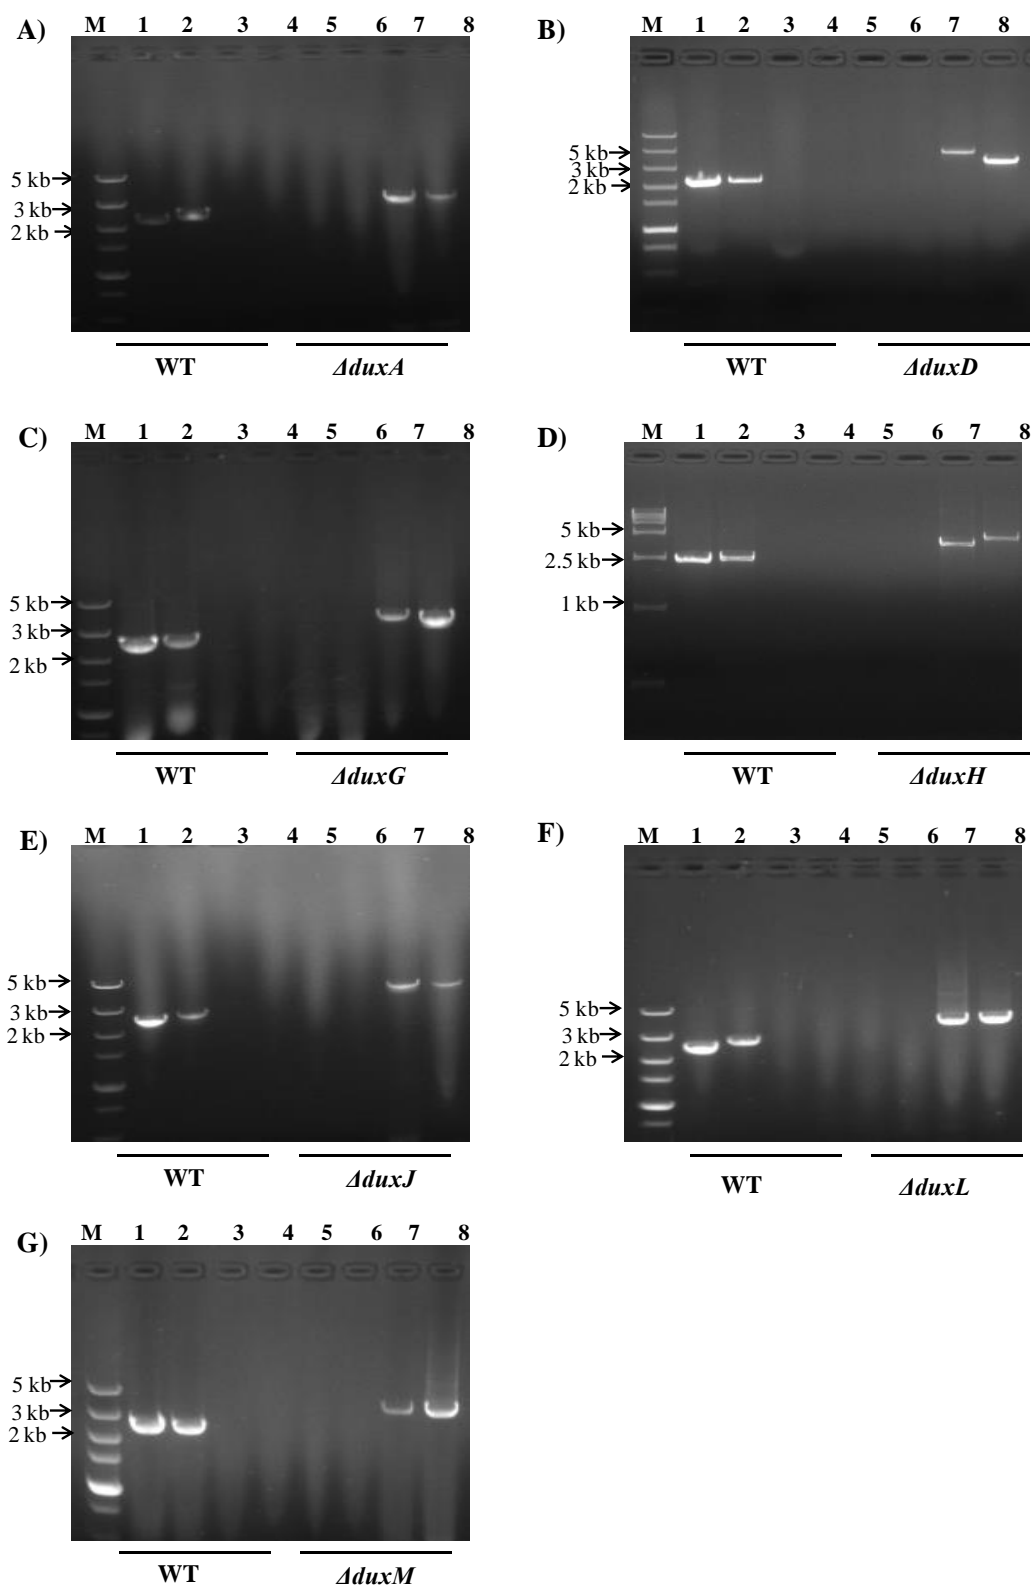

**Figure S6.** Gene knock-out of *duxA*, *duxD*, *duxG*, *duxH*, *duxJ*, *duxL*, and *duxM* in *T. stipitatus* and PCR verification of the mutants. A) PCR check the  $\Delta duxA$ ; B) PCR check the  $\Delta duxD$ ; C) PCR check the  $\Delta duxG$ ; D) PCR check the  $\Delta duxH$ ; E) PCR check the  $\Delta duxJ$ ; F) PCR check the  $\Delta duxL$ ; G) PCR check the  $\Delta duxM$ .

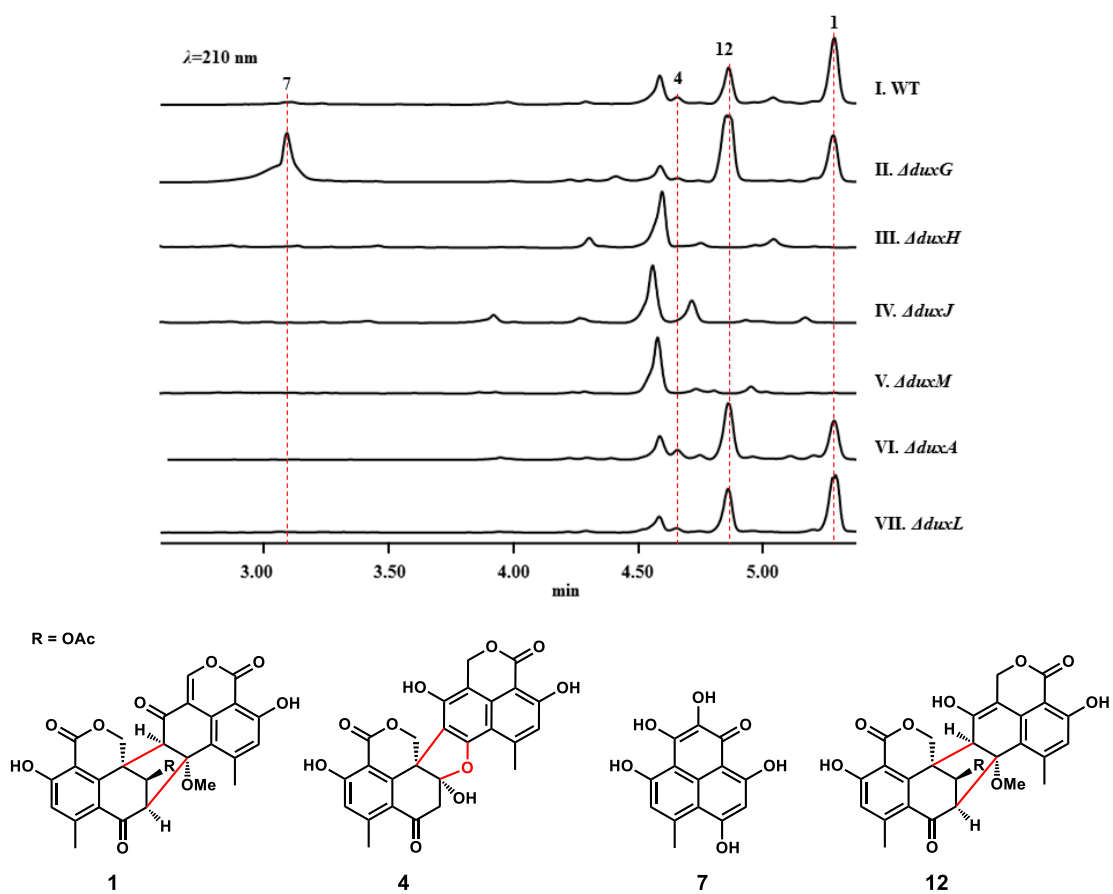

**Figure S7.** LC-MS analysis of organic extract obtained from the wild type and  $\Delta dux$  mutants including  $\Delta duxG$ ,  $\Delta duxH$ ,  $\Delta duxJ$ ,  $\Delta duxM$ ,  $\Delta duxA$ , and  $\Delta duxL$ .

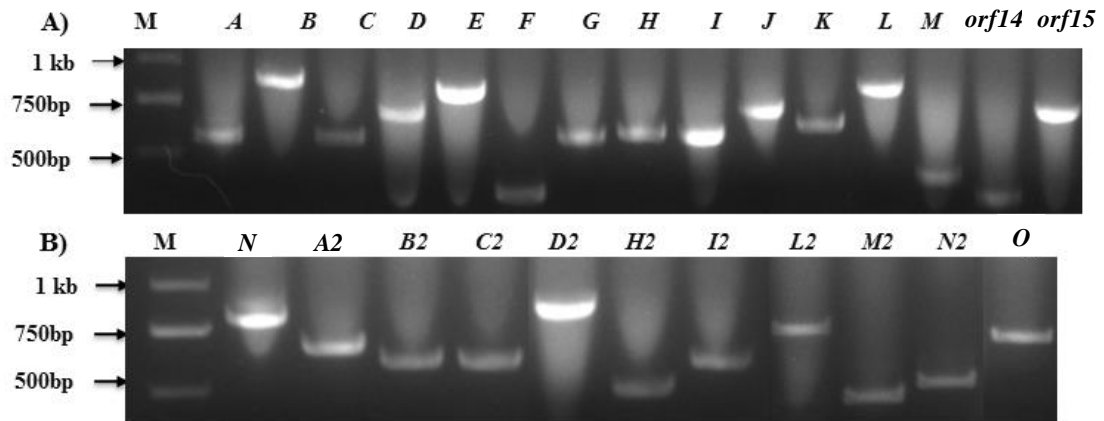

**Figure S8** RT-PCR analysis of genes in *dux* gene clusters in *T. stipitatus*. A) M: marker. Lanes A-*orf15* PCR reaction of the gene cluster *dux1* using cDNA template. B) M: marker. Lanes N, A2-O, PCR reaction of the gene cluster *dux2* using cDNA template.

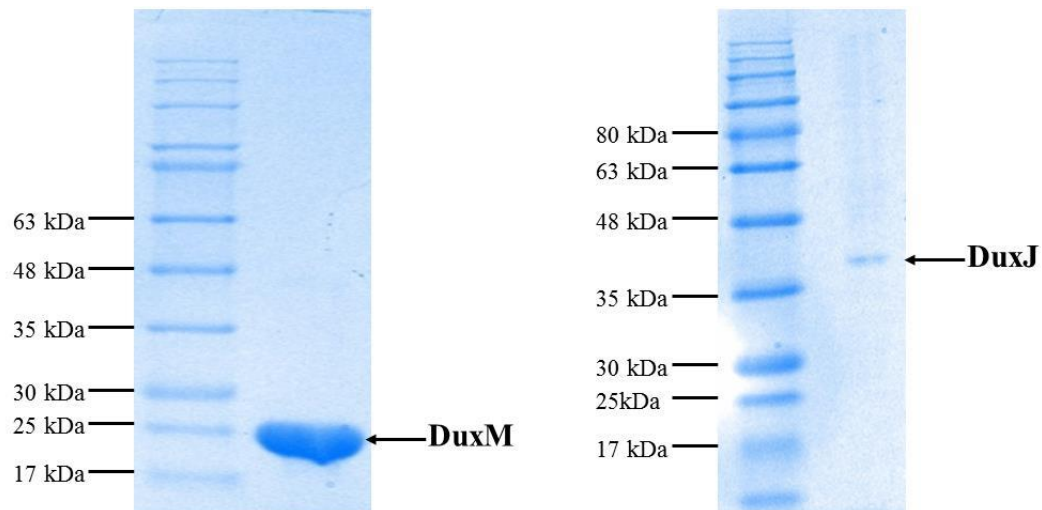

**Figure S9.** SDS-PAGE of heterogeneously expressed DuxM from *E. coli* BL21(DE3) and DuxJ from *S. cerevisiae* BJ5464-NpgA. DuxM contains an *N*-terminal His6-Tag (~23 kDa) and DuxJ contains an *N*-terminal Flag-Tag (~42 kDa). DuxM was purified using Ni-NTA agarose affinity chromatography and DuxJ was purified using anti-FLAG affinity chromatography.

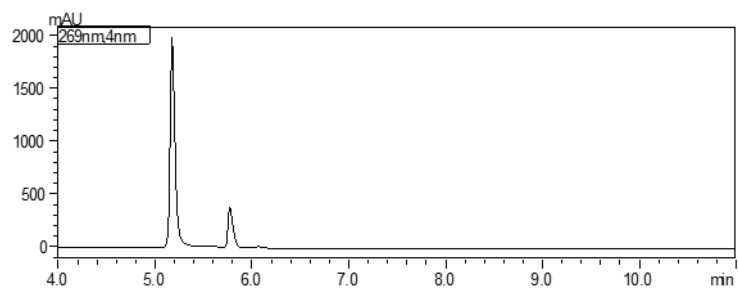

**Figure S10.** LC-MS analysis result of **14** stored in methanol for 30 min.

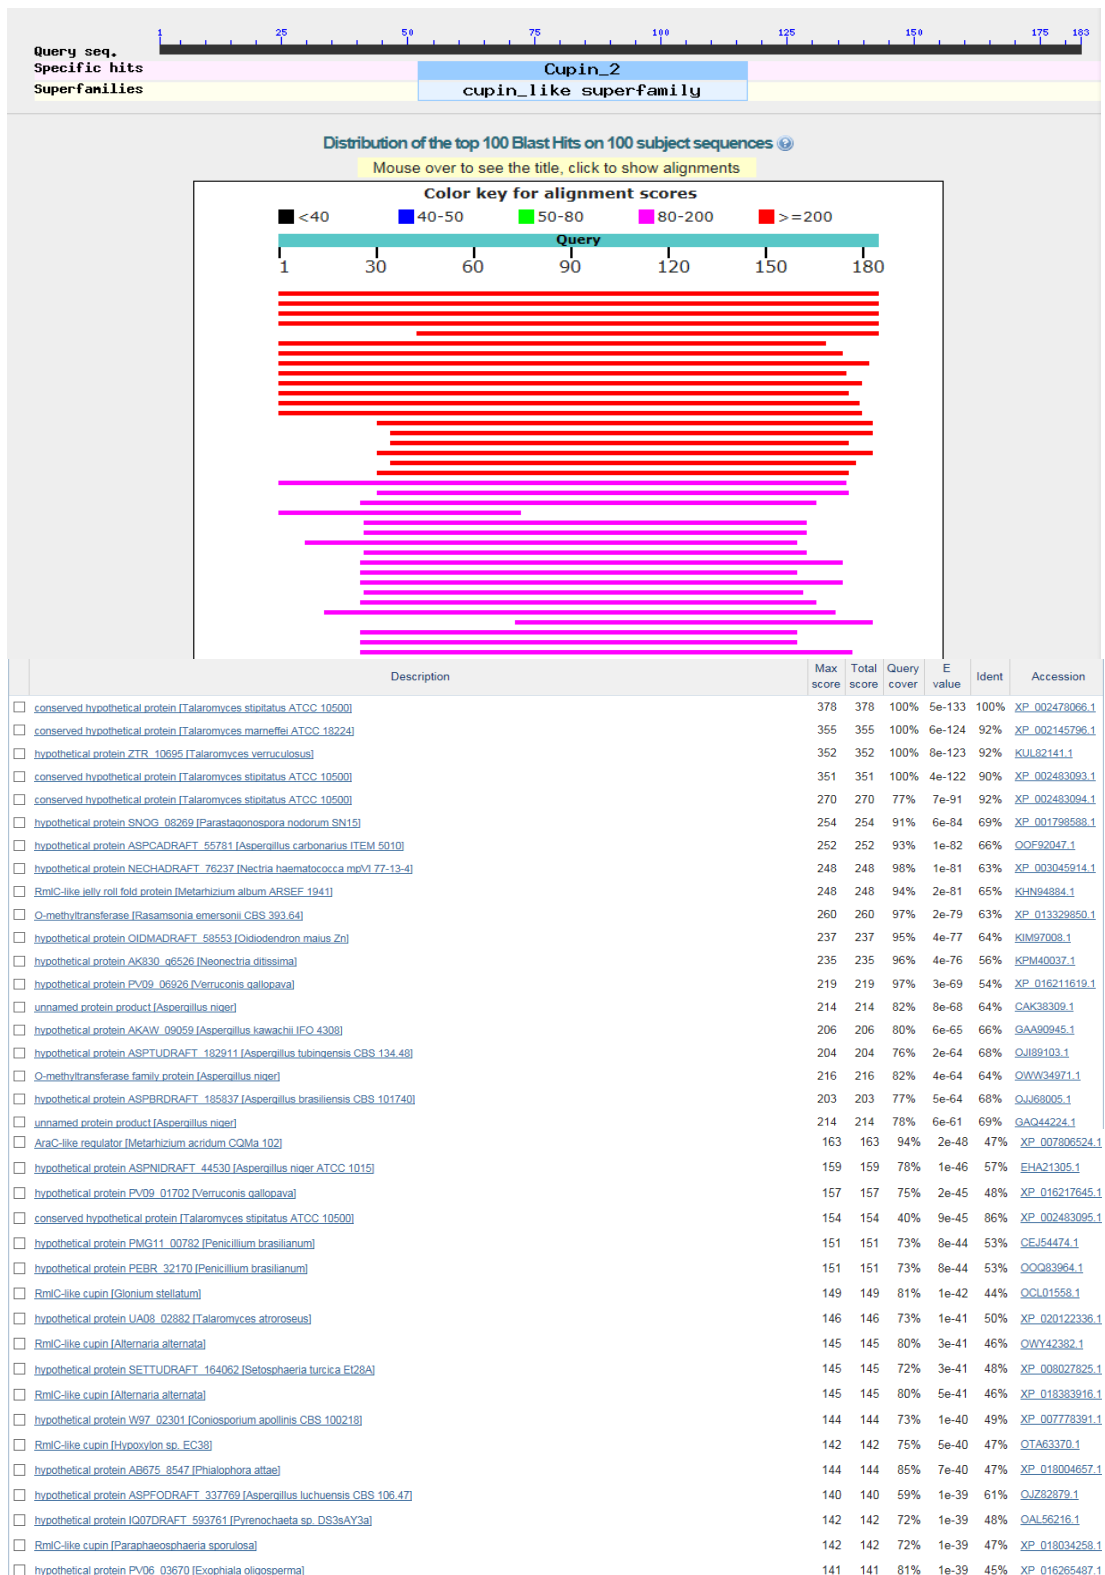

Figure S11. BLASTP alignment of DuxM in *T. stipitatus* (<https://www.ncbi.nlm.nih.gov/>).

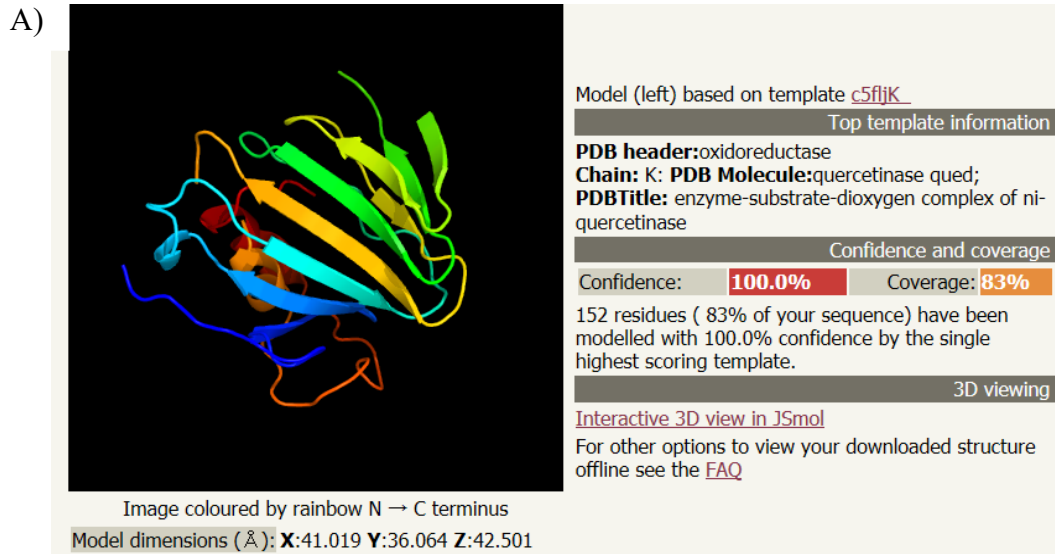

B)

|           |     |                                                                 |
|-----------|-----|-----------------------------------------------------------------|
| Q7SIC2    | 1   | -----DTSSLIVEQAPDEVRPYPVIRHYSHARAVTV                            |
| CRL30483  | 1   | MYFLLVVFITLAAGTISHGQPSTSPGKLSSTASLSDLVYVENAPDYLRPVIIPHYANSBAVSV |
| KEQ58959  | 1   | -----MHIPSLVSASAALSWSVSARSSLYVENAPDYVRPVIERYANAQAVAV            |
| DuxM      | 1   | -----MDQKHKEYIKALHVGHVRPDEIFWRR-----L                           |
| consensus | 1   | .....**.....*.....*                                             |
|           |     | <b>HxH E</b>                                                    |
| Q7SIC2    | 31  | DTOLYRFPYVTGPSSGYAFTLMCTNAPHSDALGVLPHIHQHYENFYCNKGSFOLWAQSGN    |
| CRL30483  | 61  | GSQVYRFMVTGPSSDNAFTLMSSTSAFVSTELGVLPHIHQHYENFYCNKGRFOLWAEKGN    |
| KEQ58959  | 49  | GQQLYRFPYVTGASSGCAFSILMTNSPASHDALGVLPHIHQHYENFYCNKGRFOLWADKFG   |
| DuxM      | 28  | GQYLYRVLLEDGSQTMRLCMIESLIEP-RSEGPPVFFHFMHDEGFIITKGRTRFPTP---    |
| consensus | 61  | .....**.....*.....*                                             |
|           |     | <b>H</b>                                                        |
| Q7SIC2    | 91  | ETQQTRVLSSGDYGSVPRNVTHTFQLQDPDTEMGVIIVPGGFEDLFYVYLG-TNATDTHT    |
| CRL30483  | 121 | SGQQARHLSSQGDYGSVPRNTHTFQVLDPDTEMGAIIVPGGFEDLFYALG-TNFTSSTNT    |
| KEQ58959  | 109 | D-EEARVMLFGDYCAVPRNTHTFQVLDPDTEMGVIIVPGGFEDLFYALG-TNFTSSTSS     |
| DuxM      | 84  | -GAPPIDAKAGDIITVPIRLPHKFSN-----                                 |
| consensus | 121 | .....**.....*.....*                                             |
| Q7SIC2    | 150 | PYHFSSSDSSSTT--GPDSSSTISTLOSFDVYAELESFTPTPTDVTNGTAPANTVWHTCANAL |
| CRL30483  | 180 | PYVPAASNASTSG--GSDASTISALQDFDVYSQLEDFVPRLDLNGTAPASGTEWHTGSNSL   |
| KEQ58959  | 168 | PYVPSGSGSTDAAGSSASMSIALESFDVYAQLRFNPRDLINGTAPANATWHTCKNIV       |
| DuxM      | 109 | -----PFNERGVFINITITPG-----                                      |
| consensus | 181 | .....*.....*.....*                                              |
| Q7SIC2    | 208 | ASTAGDPYPIANGVGPKYLNSQYGYQIVAPFVTAQAQDTNNTLSTISMSSTPSTVTVPT     |
| CRL30483  | 238 | G-APATPYPIANGVGPKYLNSRYGYQIVQPIVTPQAQDVNFTQSTITHSRLOSNMTTPV     |
| KEQ58959  | 228 | PSNSVTFPFYAKNGGPMYLNSEHGYEITIAPIISSVQGAGKFSSEGTITMSRRLSNMTIPV   |
| DuxM      | 124 | -----                                                           |
| consensus | 241 | .....                                                           |
| Q7SIC2    | 268 | NSFPGCAFQVQECRVVVCIGDYAAATELGSQDVAFIPGVEFKYYSAYFSKVLVSSGS       |
| CRL30483  | 297 | NSQPGSFAFQVVEGILKIKIGDMPATLTTGQDVAFIPGVSYSYRSDFEFTKVLVYSRGE     |
| KEQ58959  | 288 | RRFADHMAFEVLECALMVKMQGE-EVQLLQGDVVFVPGSTTFYSYWSVAFPTFLVYVCSG    |
| DuxM      | 124 | -----PFVRYFEYLEQLLGDGTKLTAEANIAALKRPAFVPLDEDTIMKLIEESKANG       |
| consensus | 301 | .....*.....*                                                    |
| Q7SIC2    | 328 | DGLDONLVNGGGEWSSVSFPADW-                                        |
| CRL30483  | 357 | DGLDONLIIKGGKHWDFVTFPKD--                                       |
| KEQ58959  | 347 | RGLDVELRKAWEWYFVWPTTAV                                          |
| DuxM      | 176 | NGDVIDI-----                                                    |
| consensus | 361 | *.....*                                                         |

**Figure S12.** A) Structure analysis of DuxM by Phyre2 showed DuxM is close to quercetinase (quercetin 2, 3-dioxygenase). B) Multiple sequence alignment of DuxM and other fungal cupin family enzymes by ClustalW, a conserved characteristic HxHxxxxEx(n)H motif coordinated to a divalent metal ions centre. The amino acids corresponding to characteristic motif are numbered as H<sub>62</sub>xH<sub>64</sub>xxxxE<sub>69</sub>x(n)H<sub>104</sub>. Q7SIC2, quercetin 2, 3-dioxygenase from *Aspergillus japonicas*; CRL30483, cupin family enzyme from *Penicillium camemberti* FM013; KEQ58959, cupin family enzyme from *Aureobasidium melanogenum* CBS 110374.



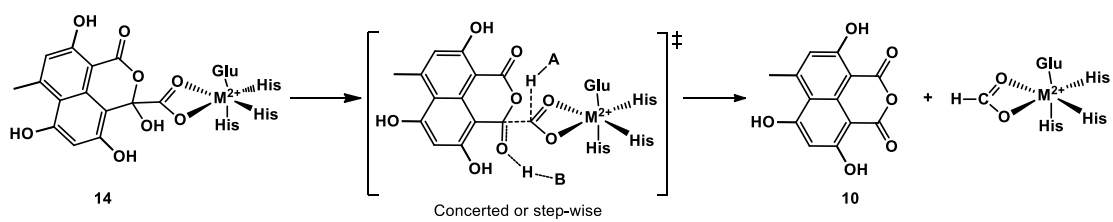

**Figure S13.** Proposed biosynthetic pathway for decarboxylation of **14** to form **10** catalyzed by DuxM.

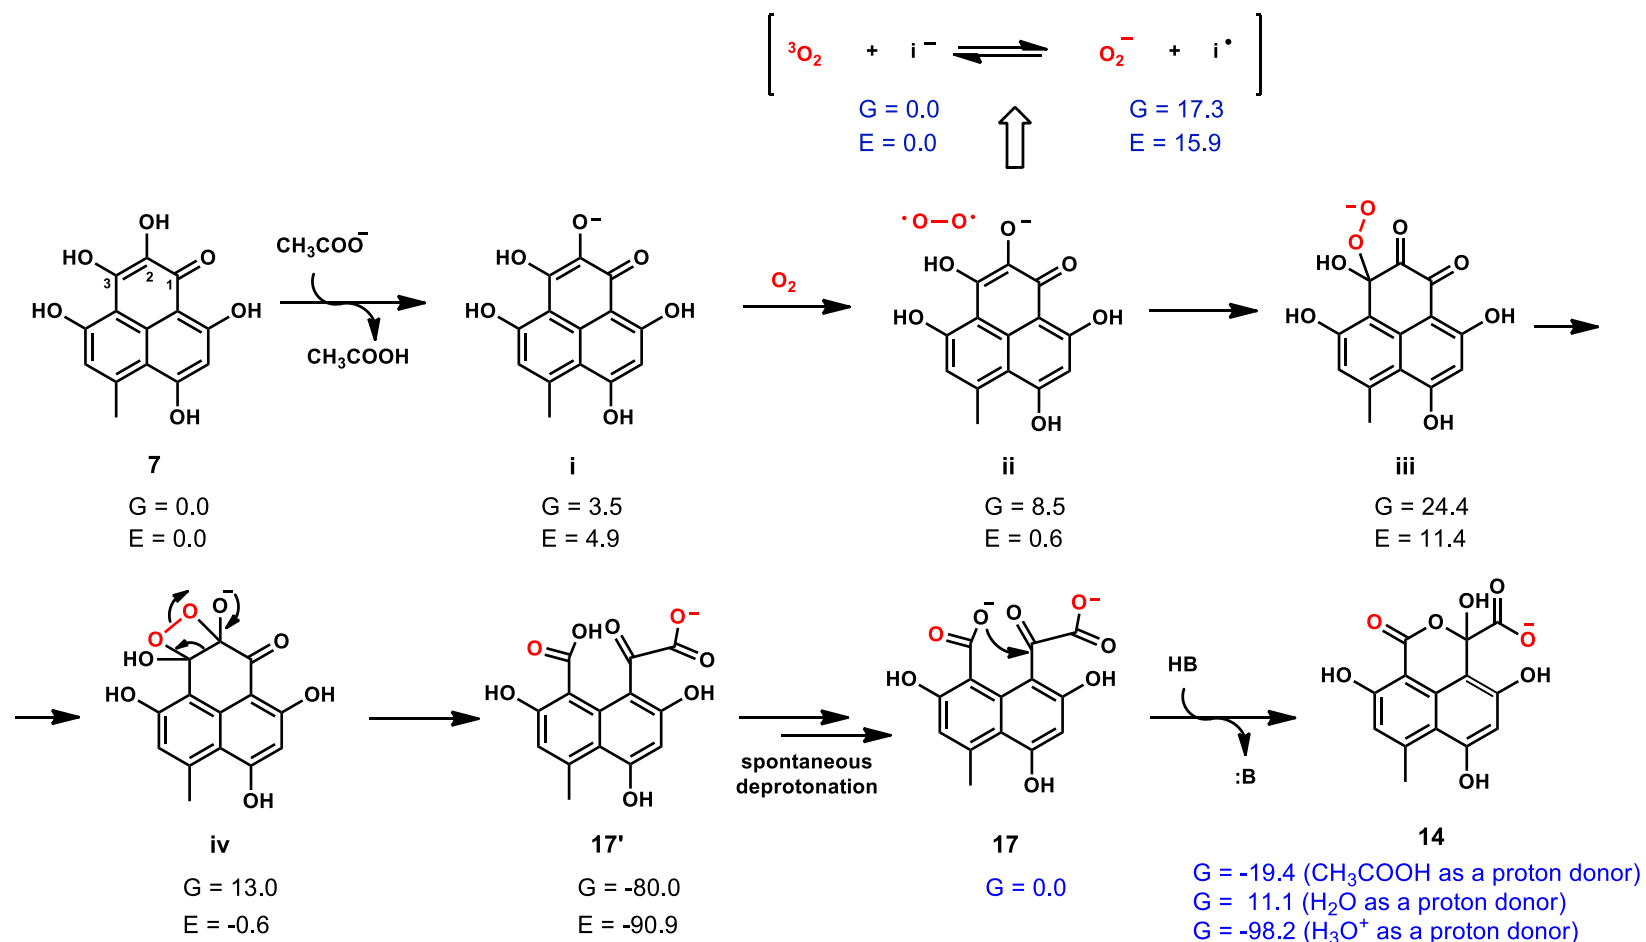

**Figure S14.** Computed reaction mechanism for the conversion of **7** to **14** and **15** in the absence of a metal counterion at B3LYP-D3BJ/6-311++G(d,p)-PCM(diethylether) // B3LYP/6-31G(d)-PCM(diethylether) level. All electronic (E) and Gibbs (G) energy values are given in kcal mol<sup>-1</sup>

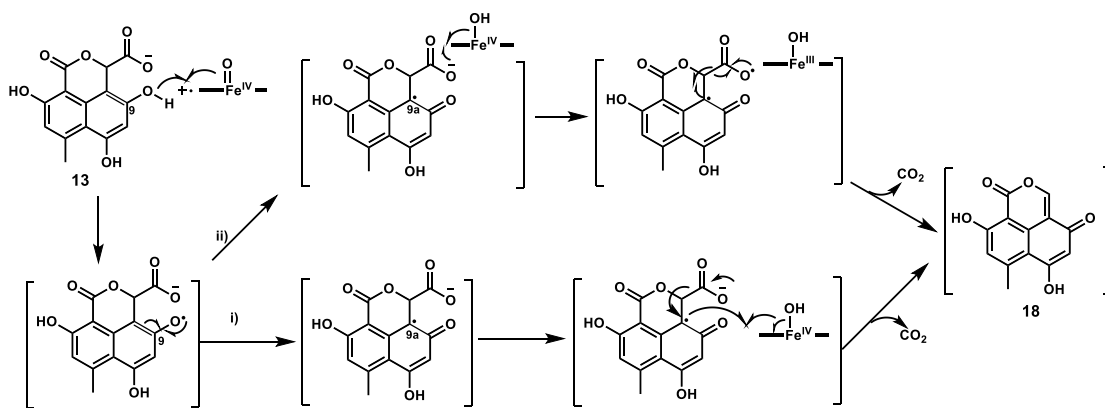

**Figure S15.** Two proposed routes for the DuxD catalyzed decarboxylation.

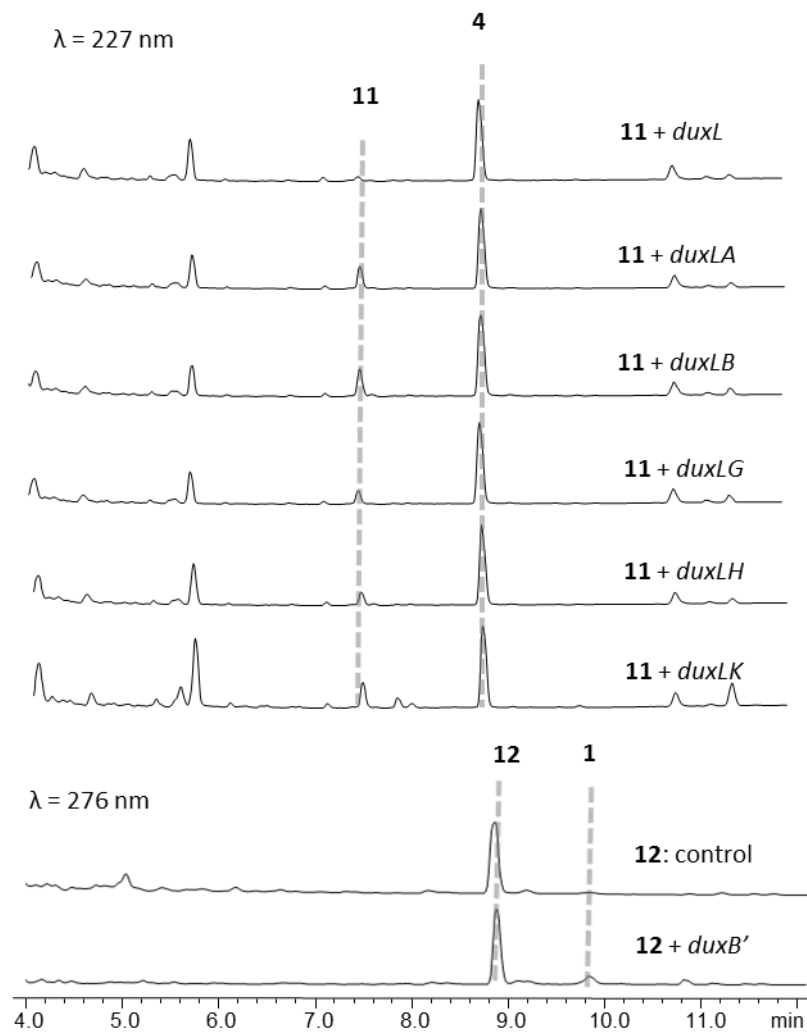

**Figure S16.** LC-MS analysis results of chemical complementation studies in yeast.

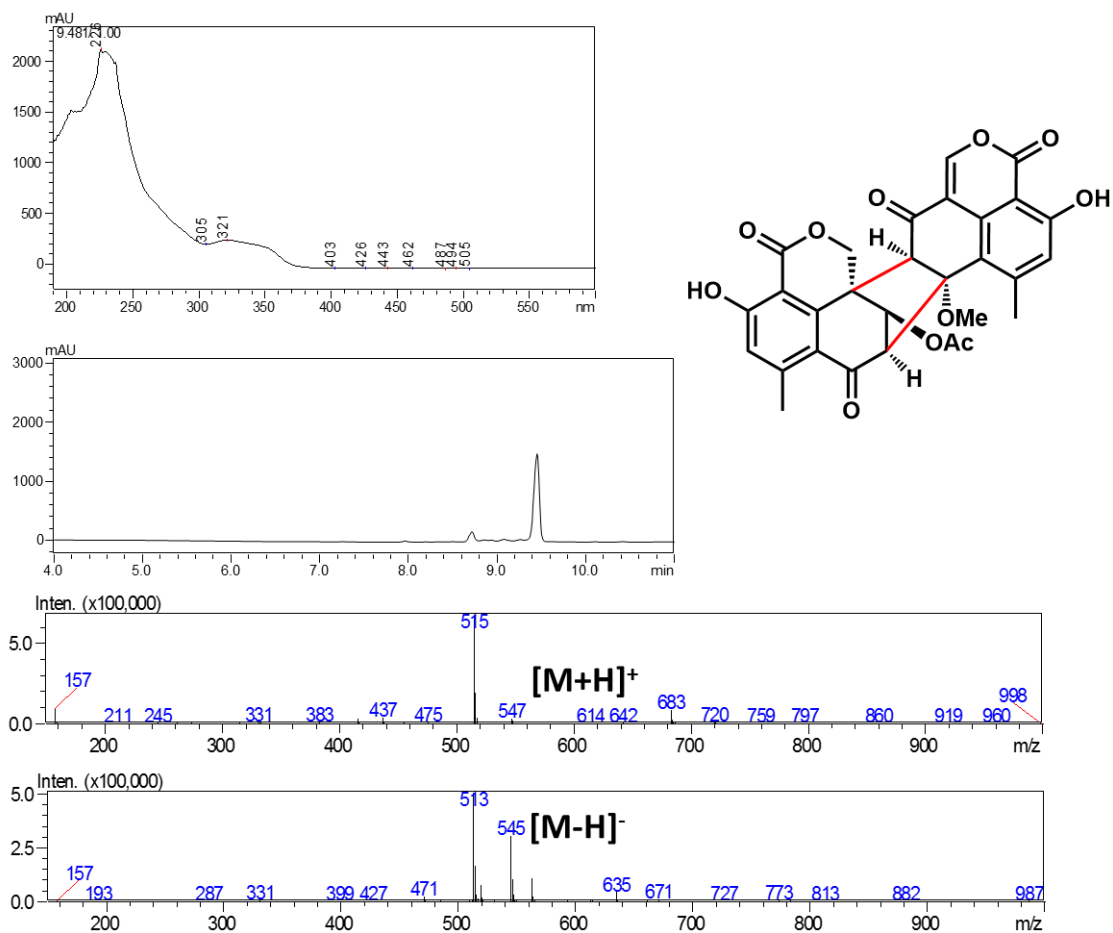

**Figure S17.** UV and MS spectra of **1**.

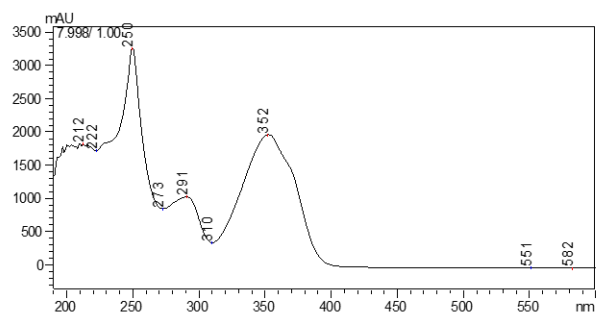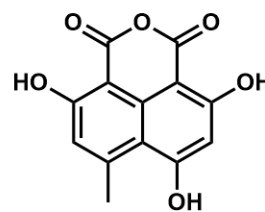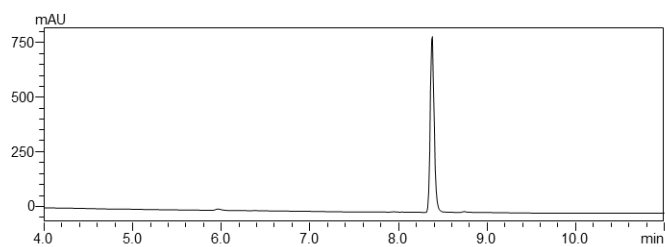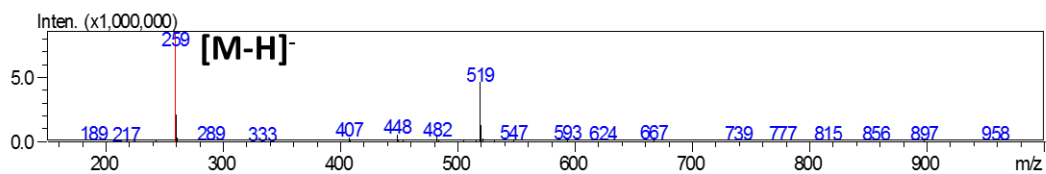

**Figure S18.** UV and MS spectra of **10**.

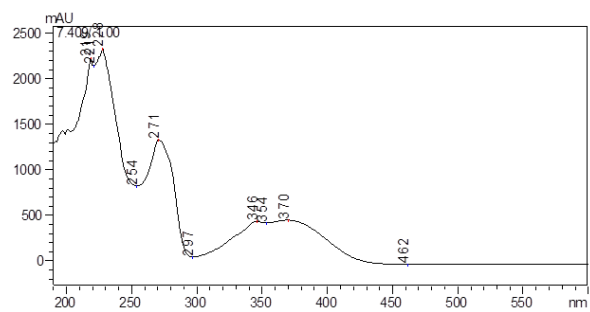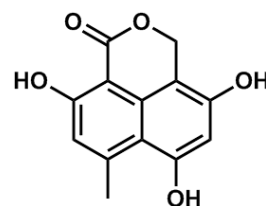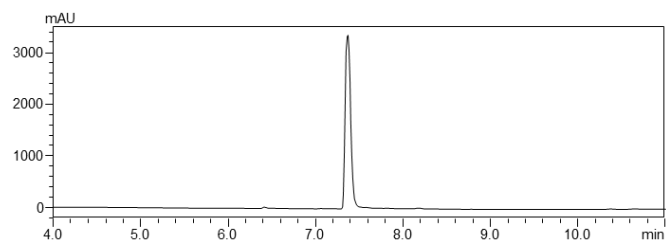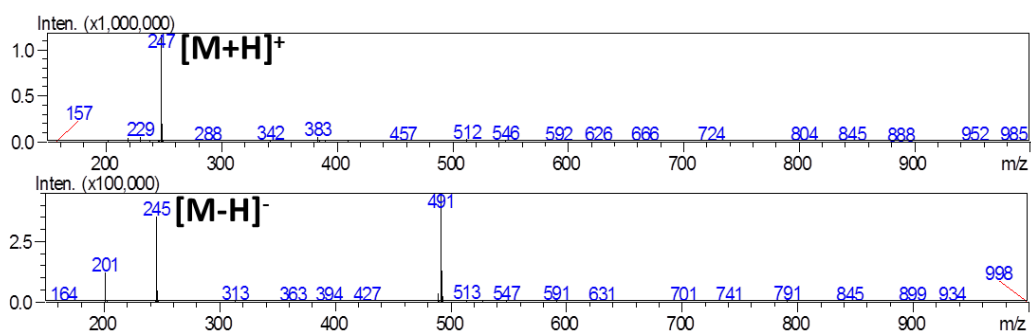

**Figure S19.** UV and MS spectra of **11**.

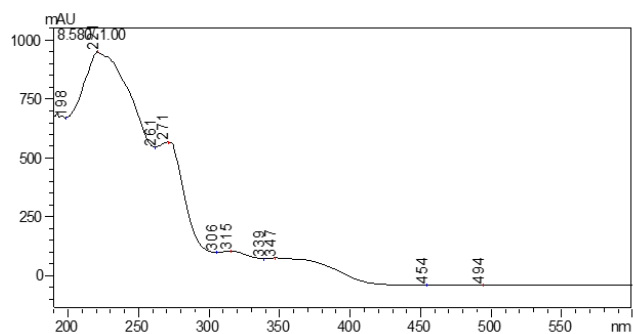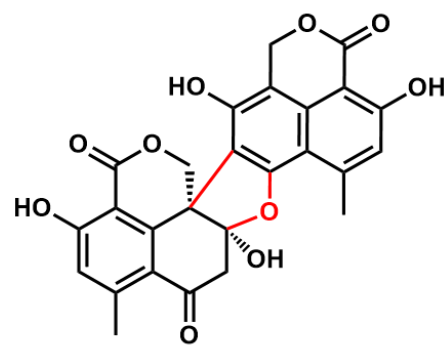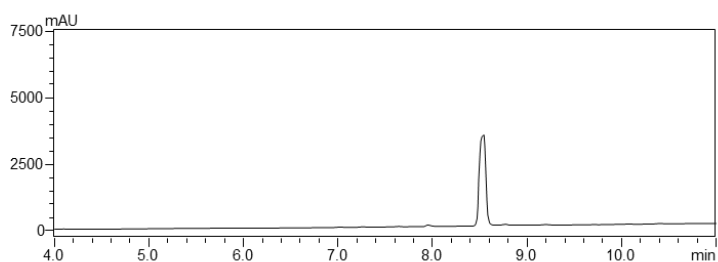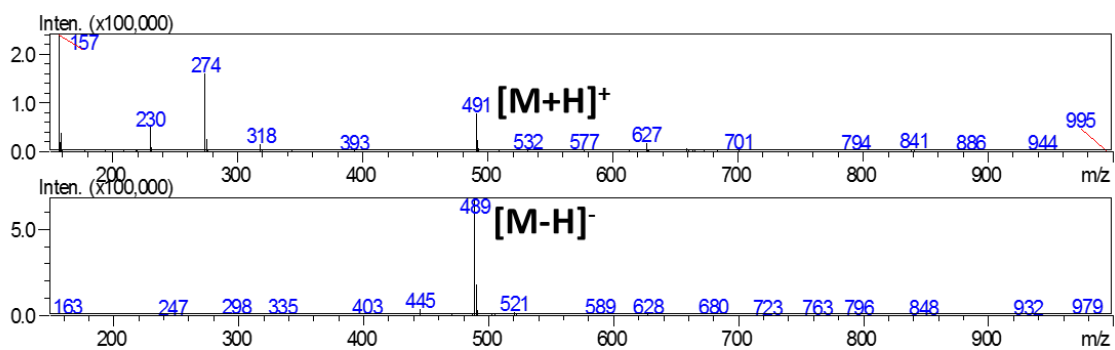

Figure S20. UV and MS spectra of 4.



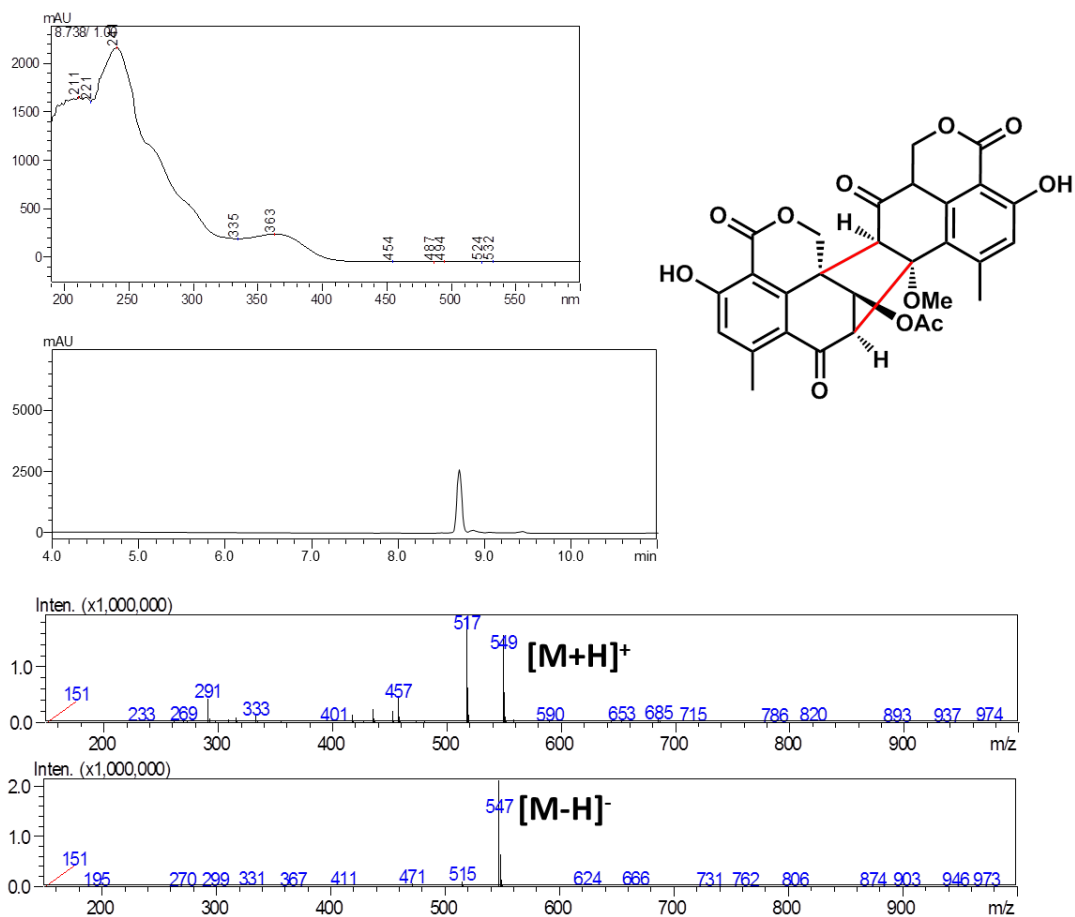

**Figure S21.** UV and MS spectra of **12**.

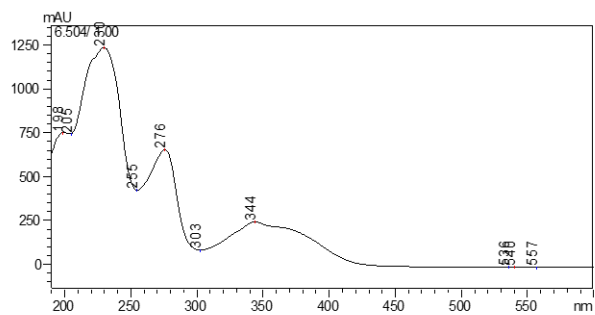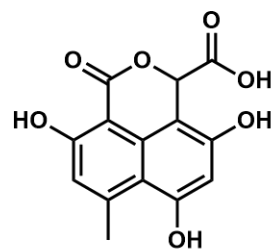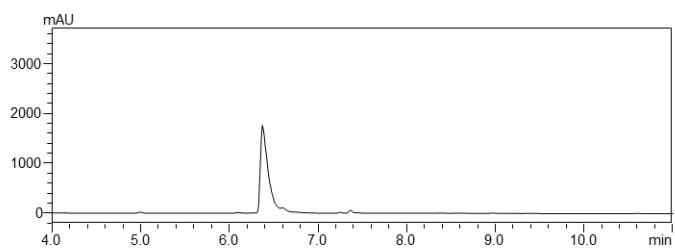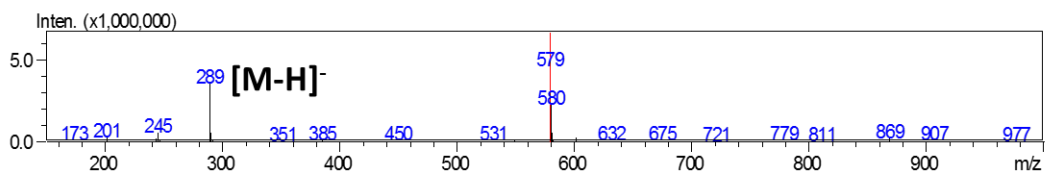

**Figure S22.** UV and MS spectra of **13**.

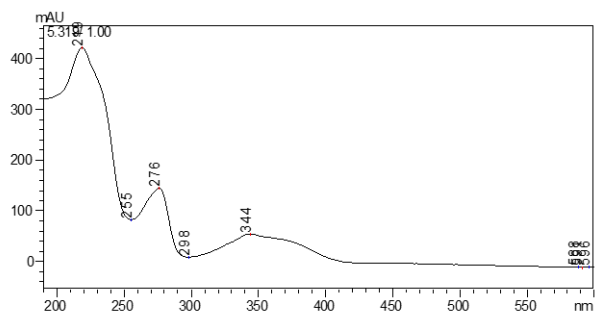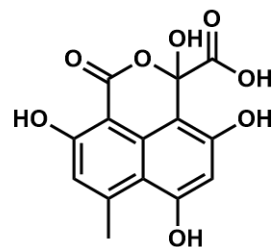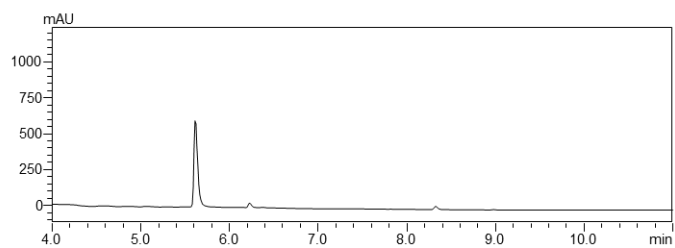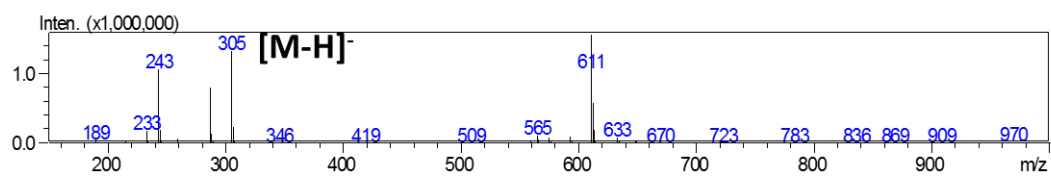

Figure S23. UV and MS spectra of 14.

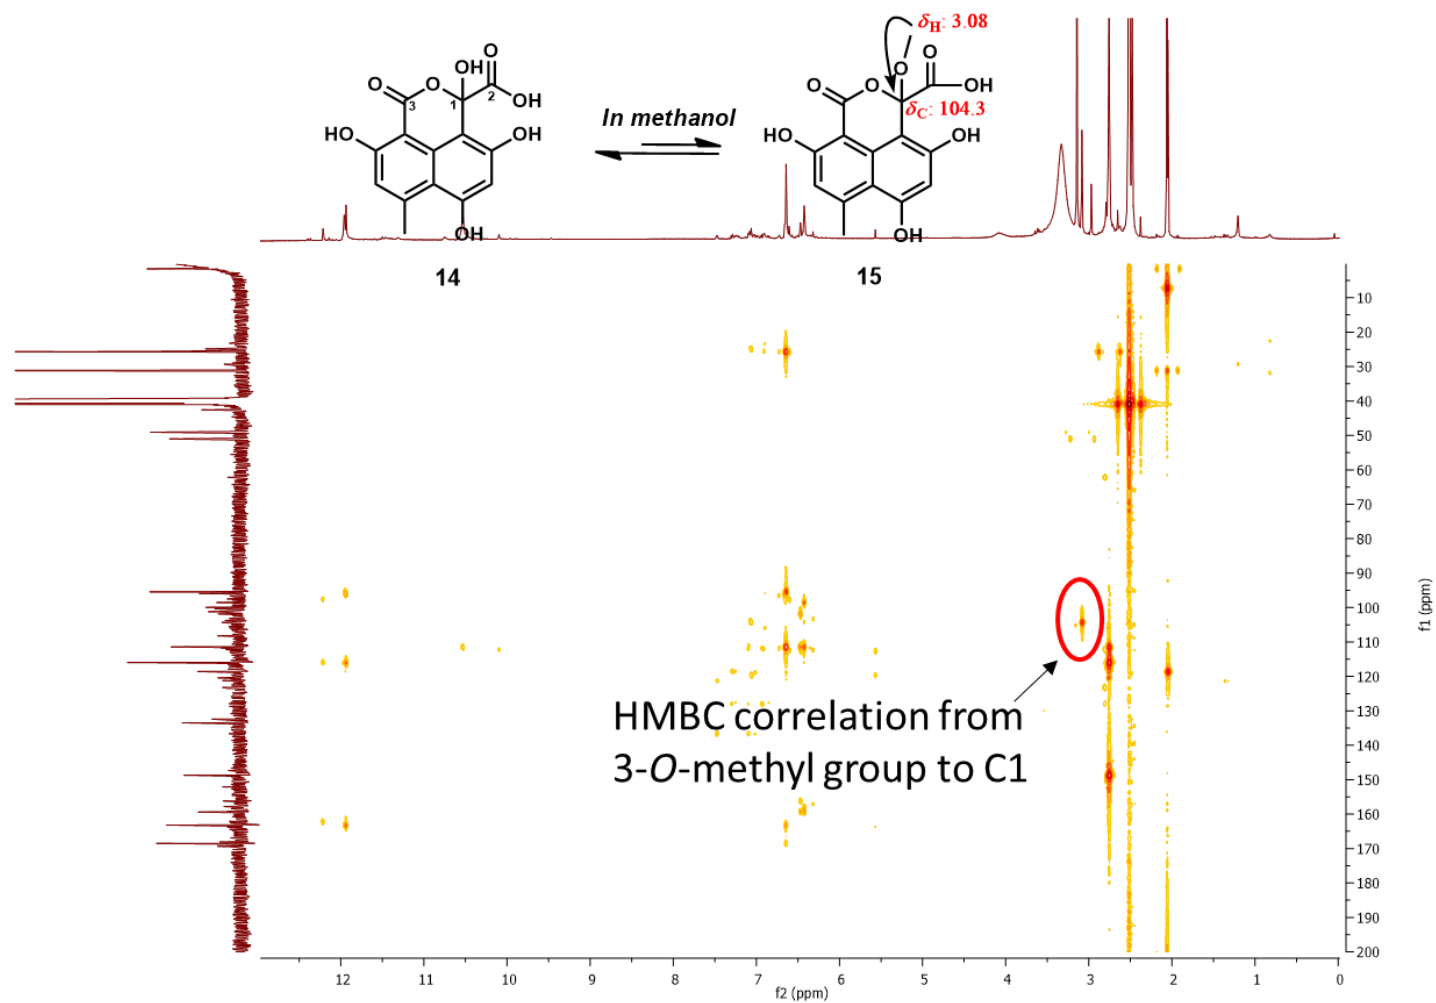

**Figure S24.** The HMBC spectrum of the mixture of **14** and **15**, which indicates the correlation from 3-O-methyl group to C1 in **15**.

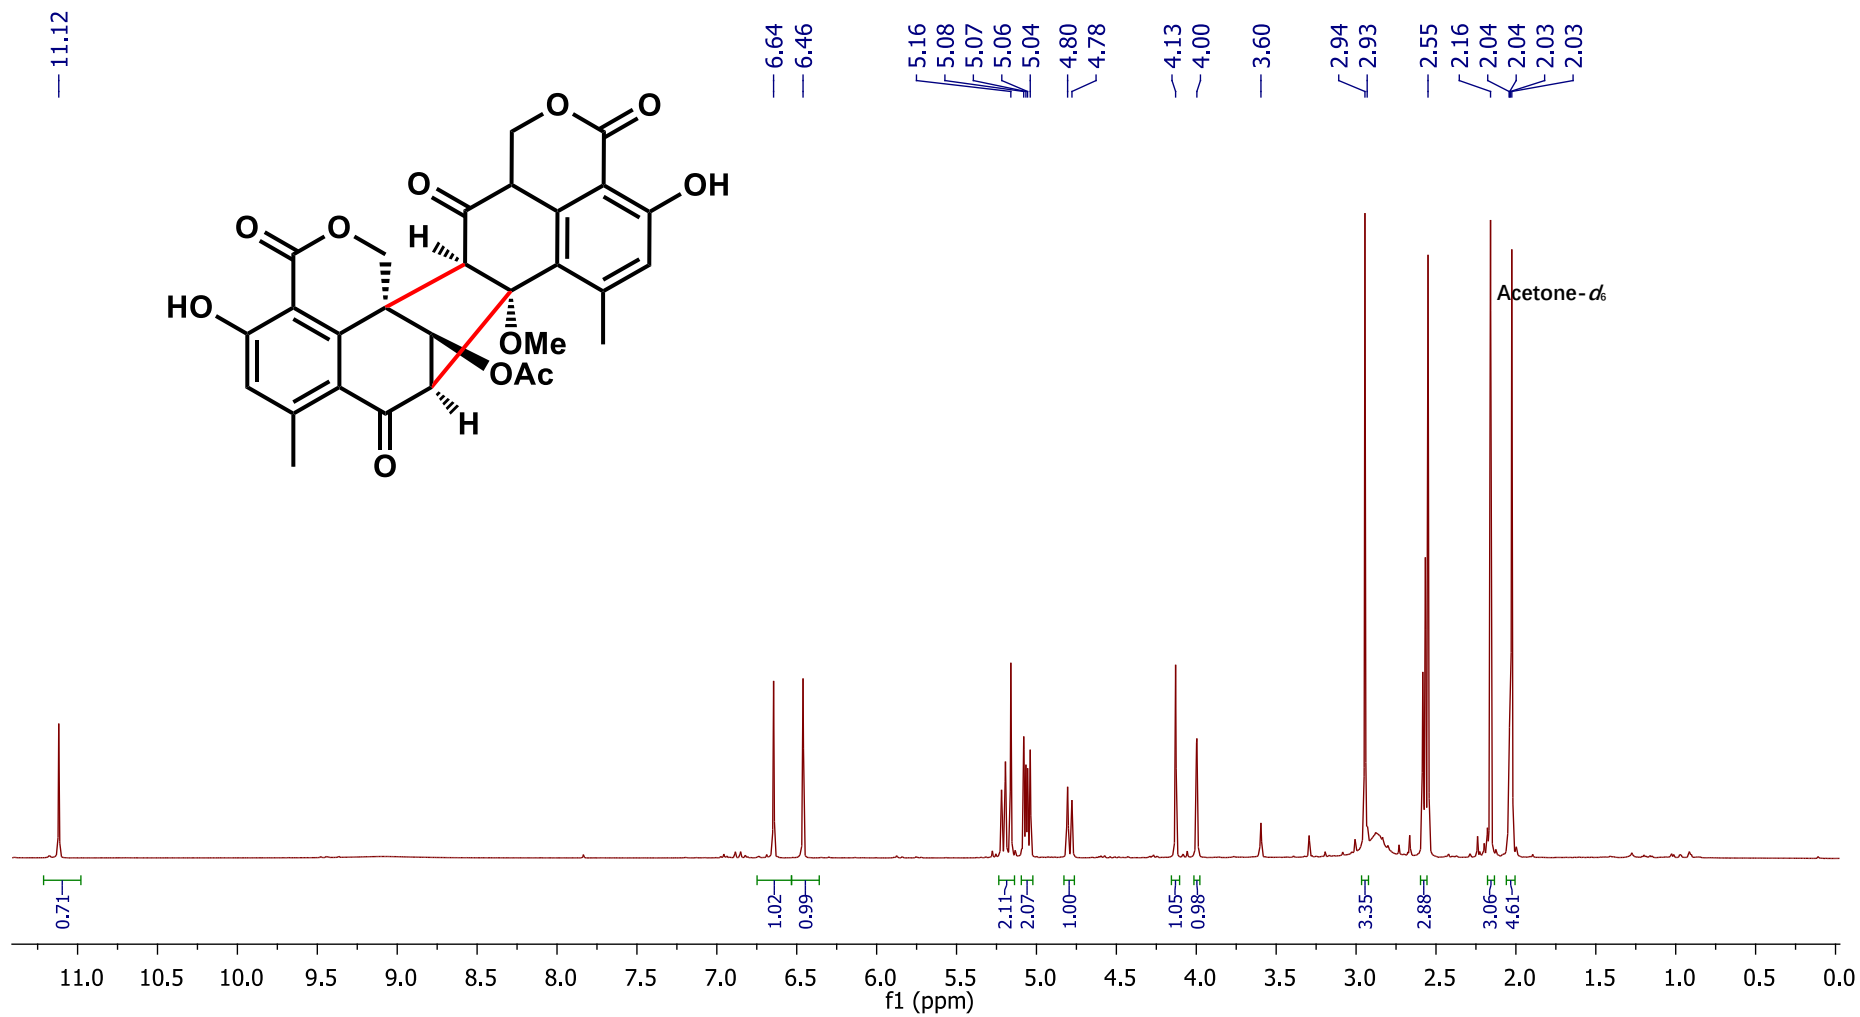

Figure S25.  $^1\text{H-NMR}$  of **12** in acetone- $d_6$  (500 MHz).

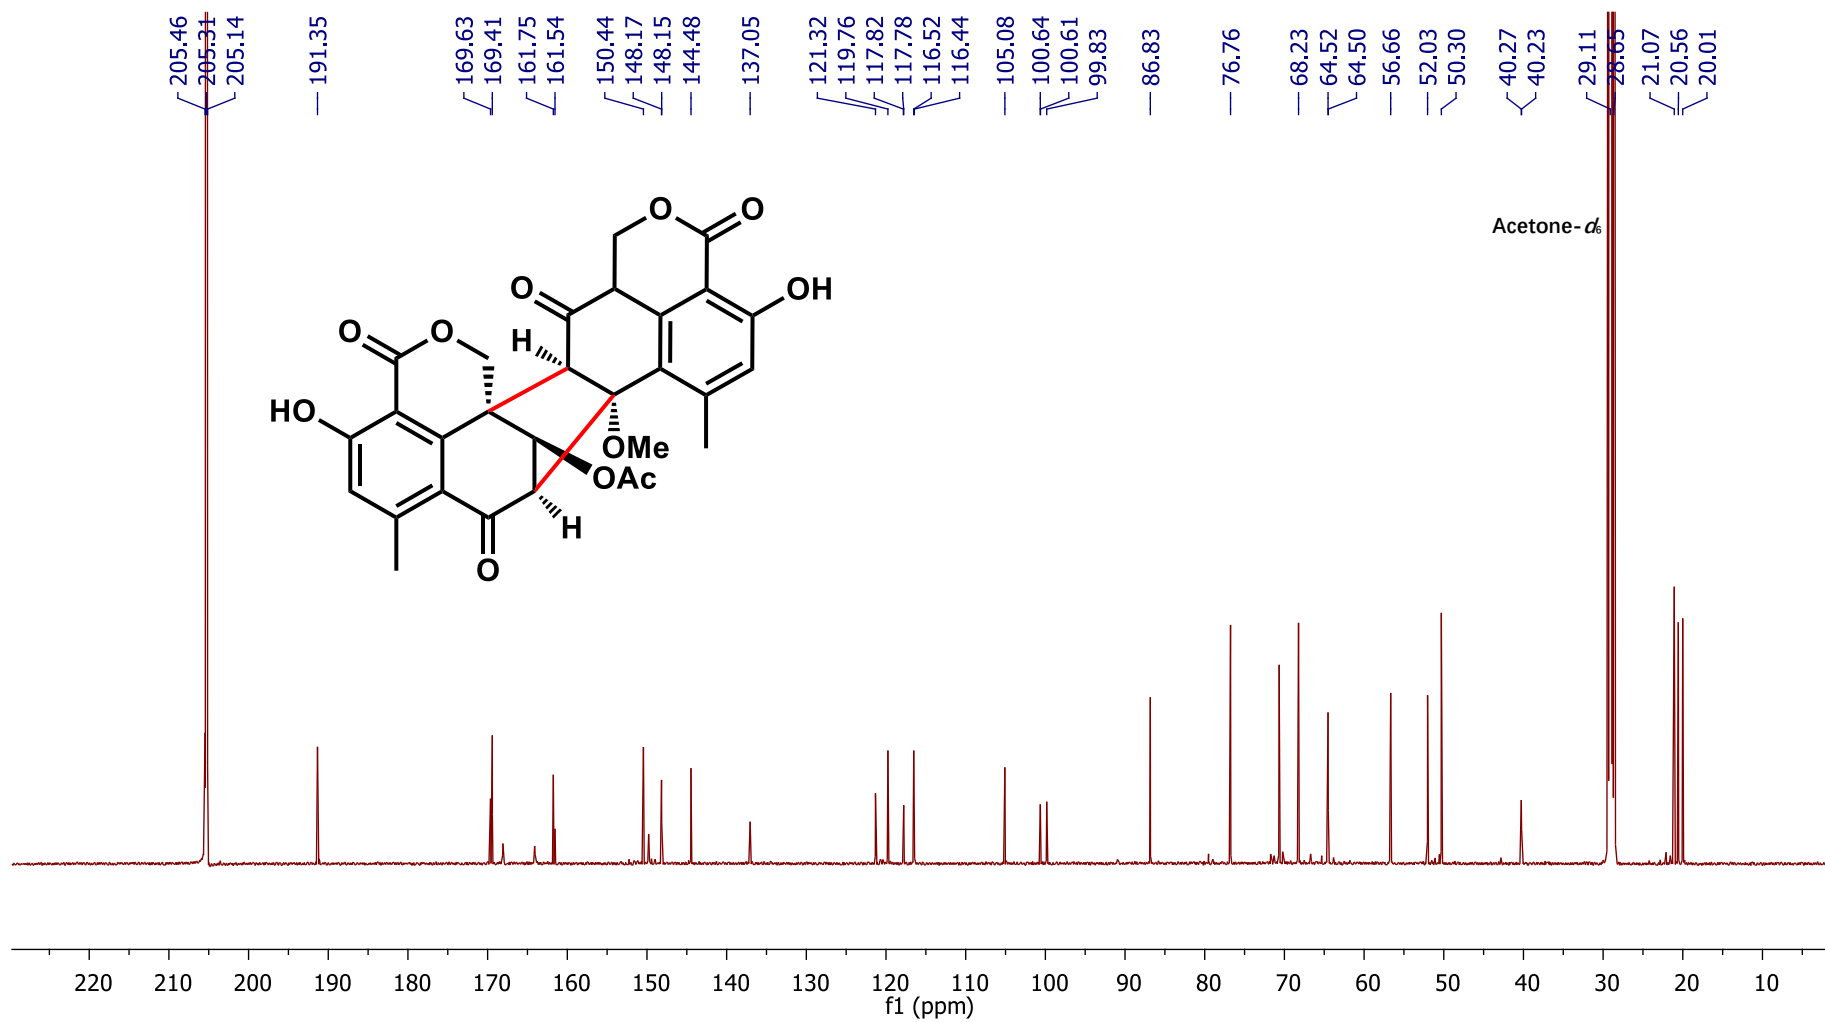

Figure S26.  $^{13}\text{C}$ -NMR of **12** in acetone- $d_6$  (125 MHz).

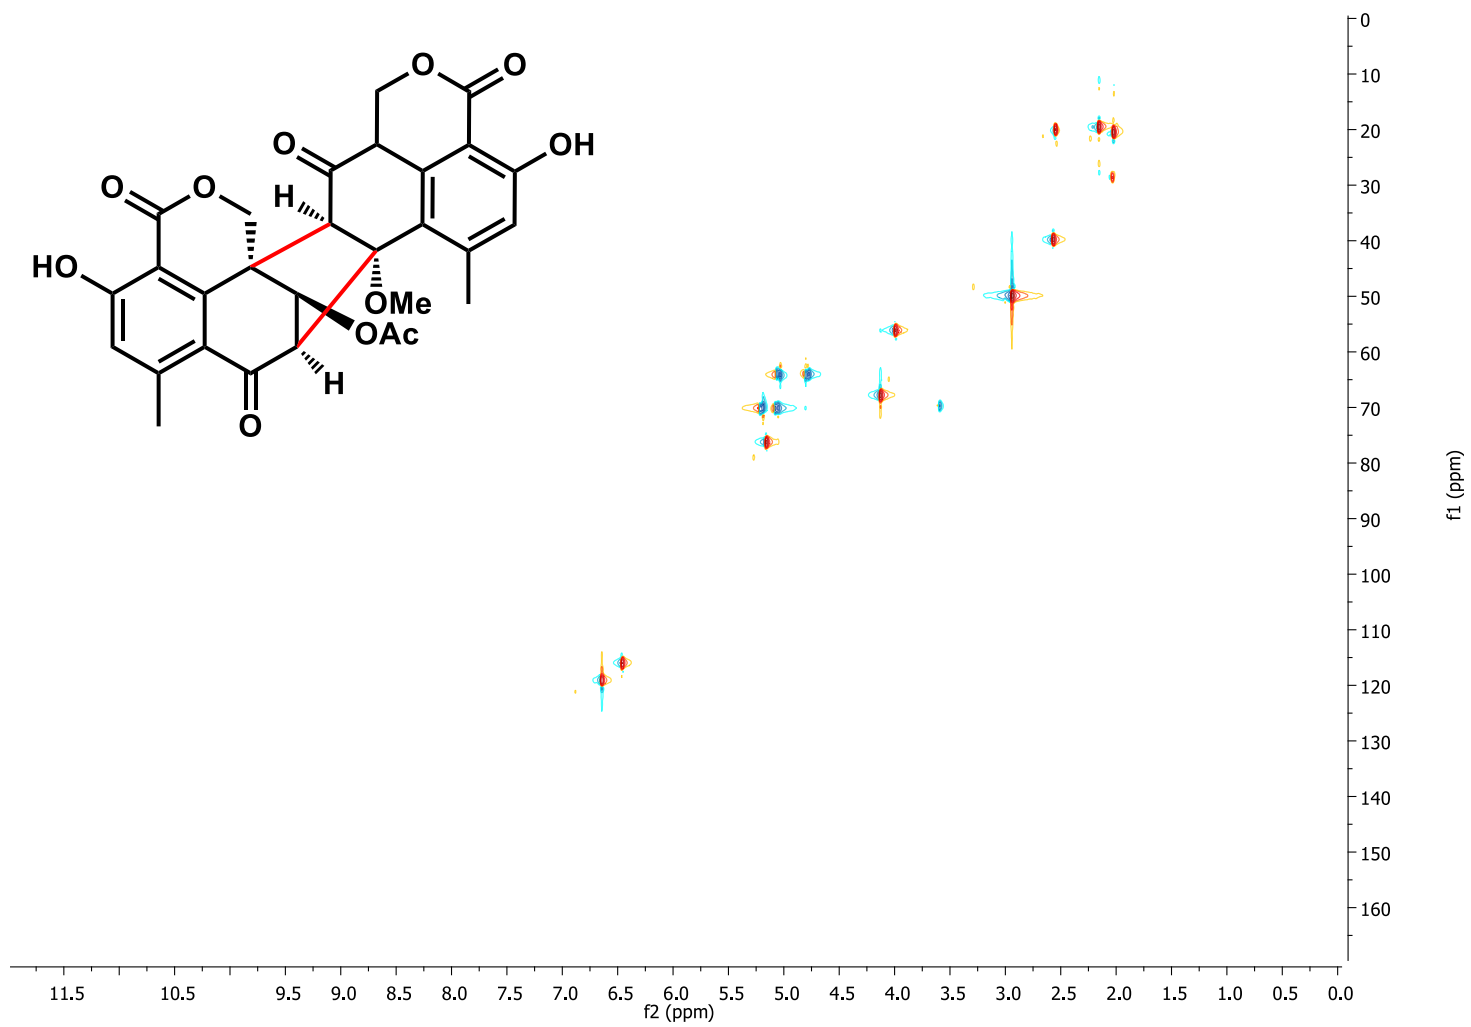

**Figure S27.** HSQC spectrum of **12** in acetone-*d*<sub>6</sub>.

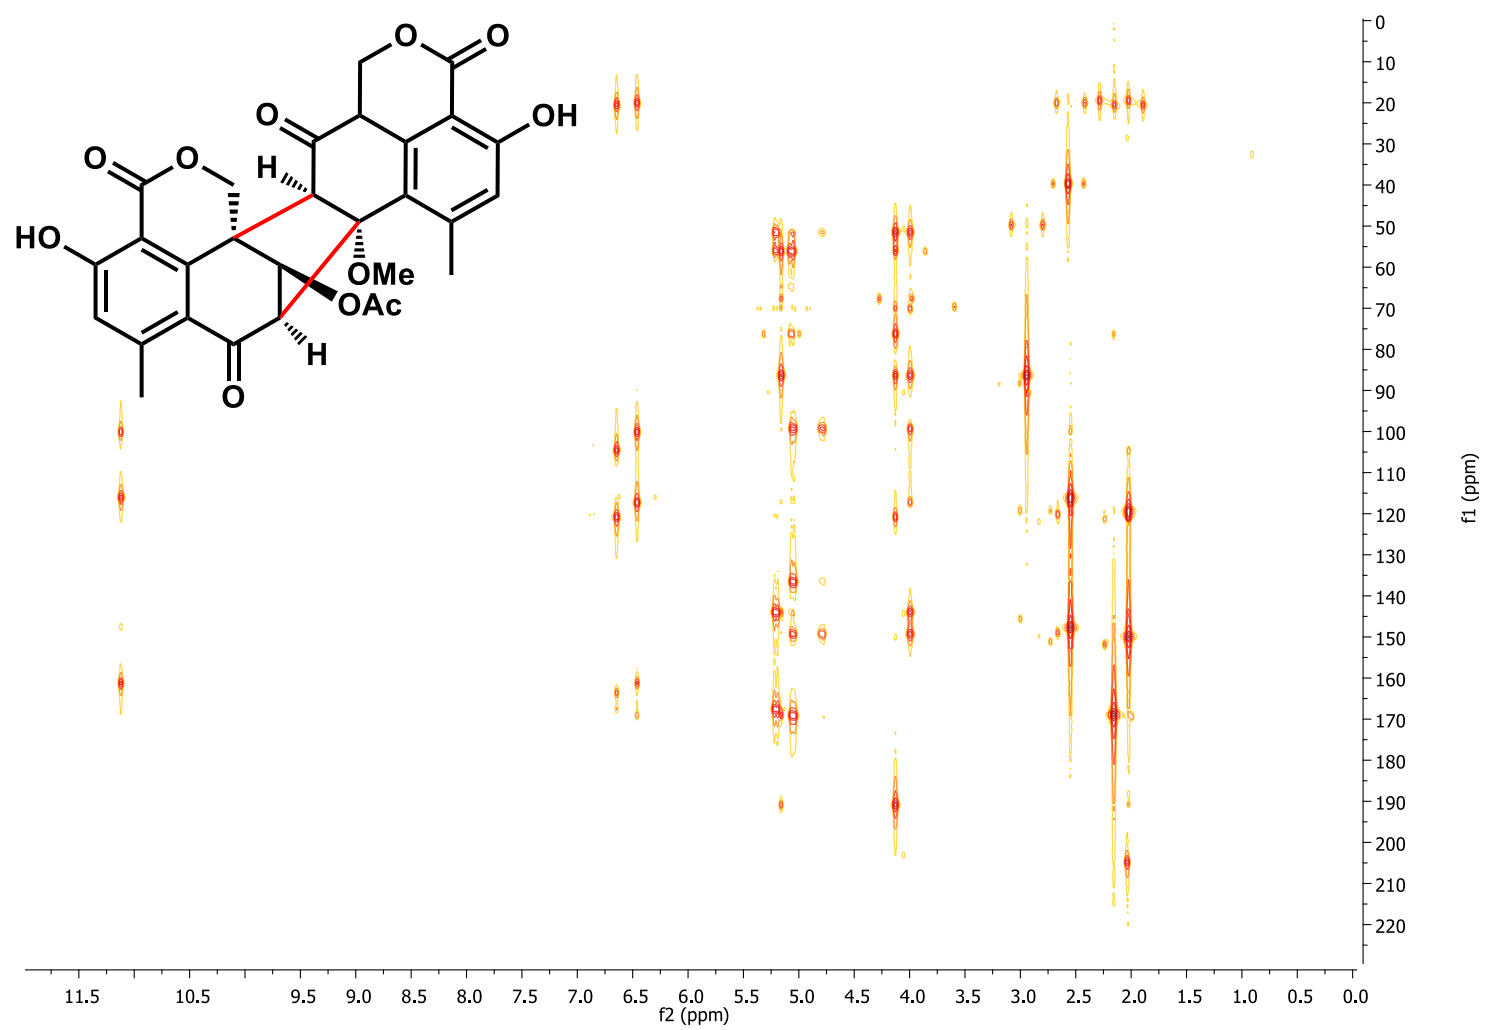

**Figure S28.** HMBC spectrum of **12** in acetone- $d_6$ .



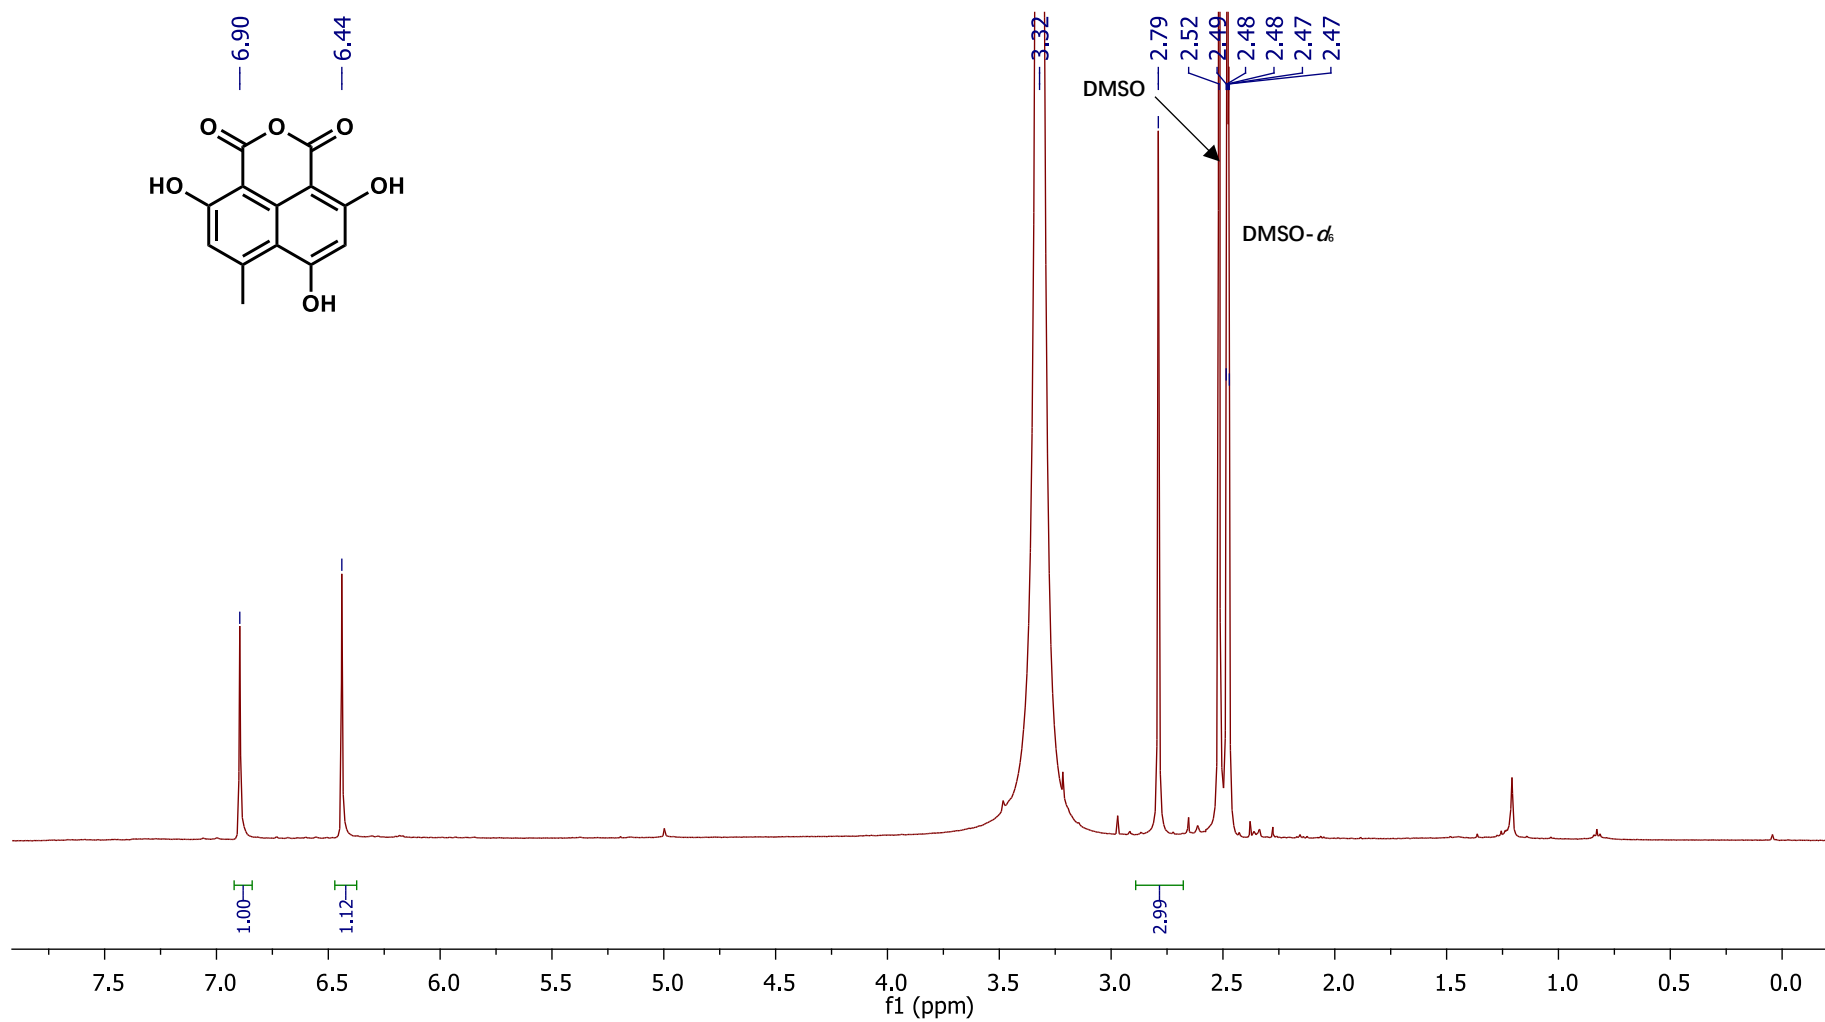

**Figure S29.** <sup>1</sup>H-NMR of **10** in DMSO-*d*<sub>6</sub> (500 MHz).

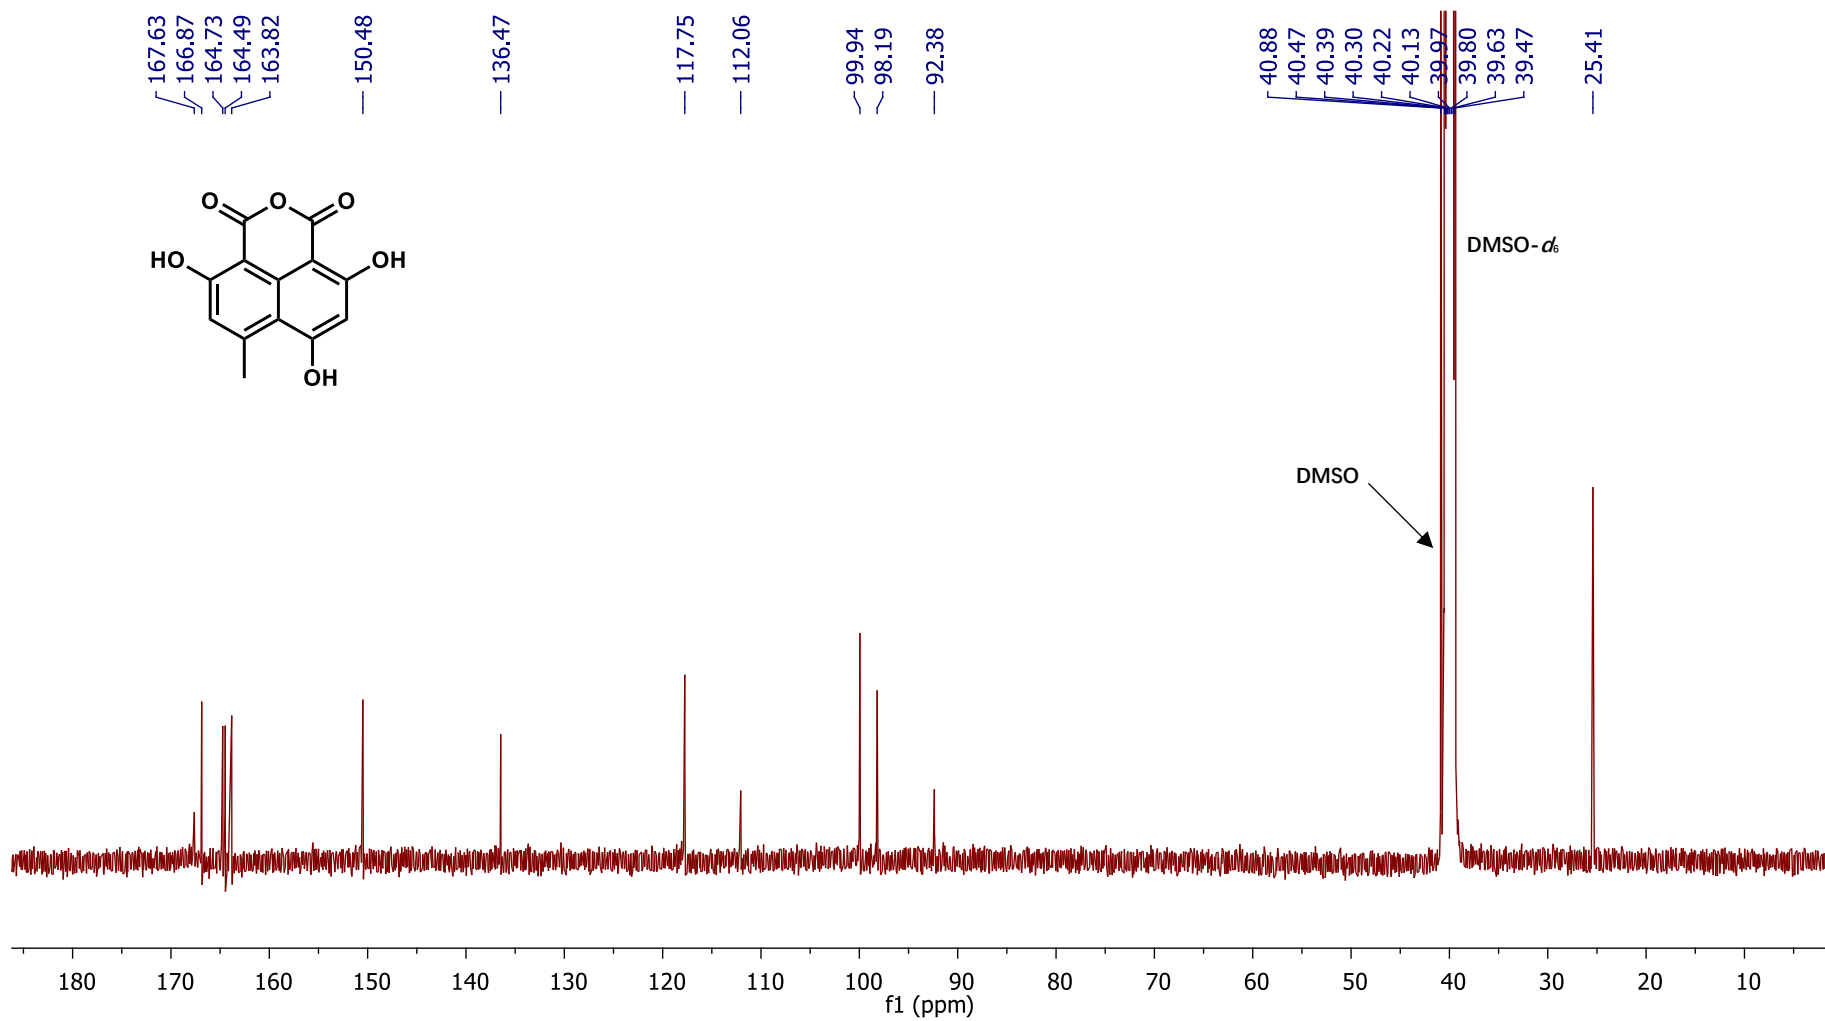

Figure S30. <sup>13</sup>C-NMR of **10** in DMSO-*d*<sub>6</sub> (125 MHz).

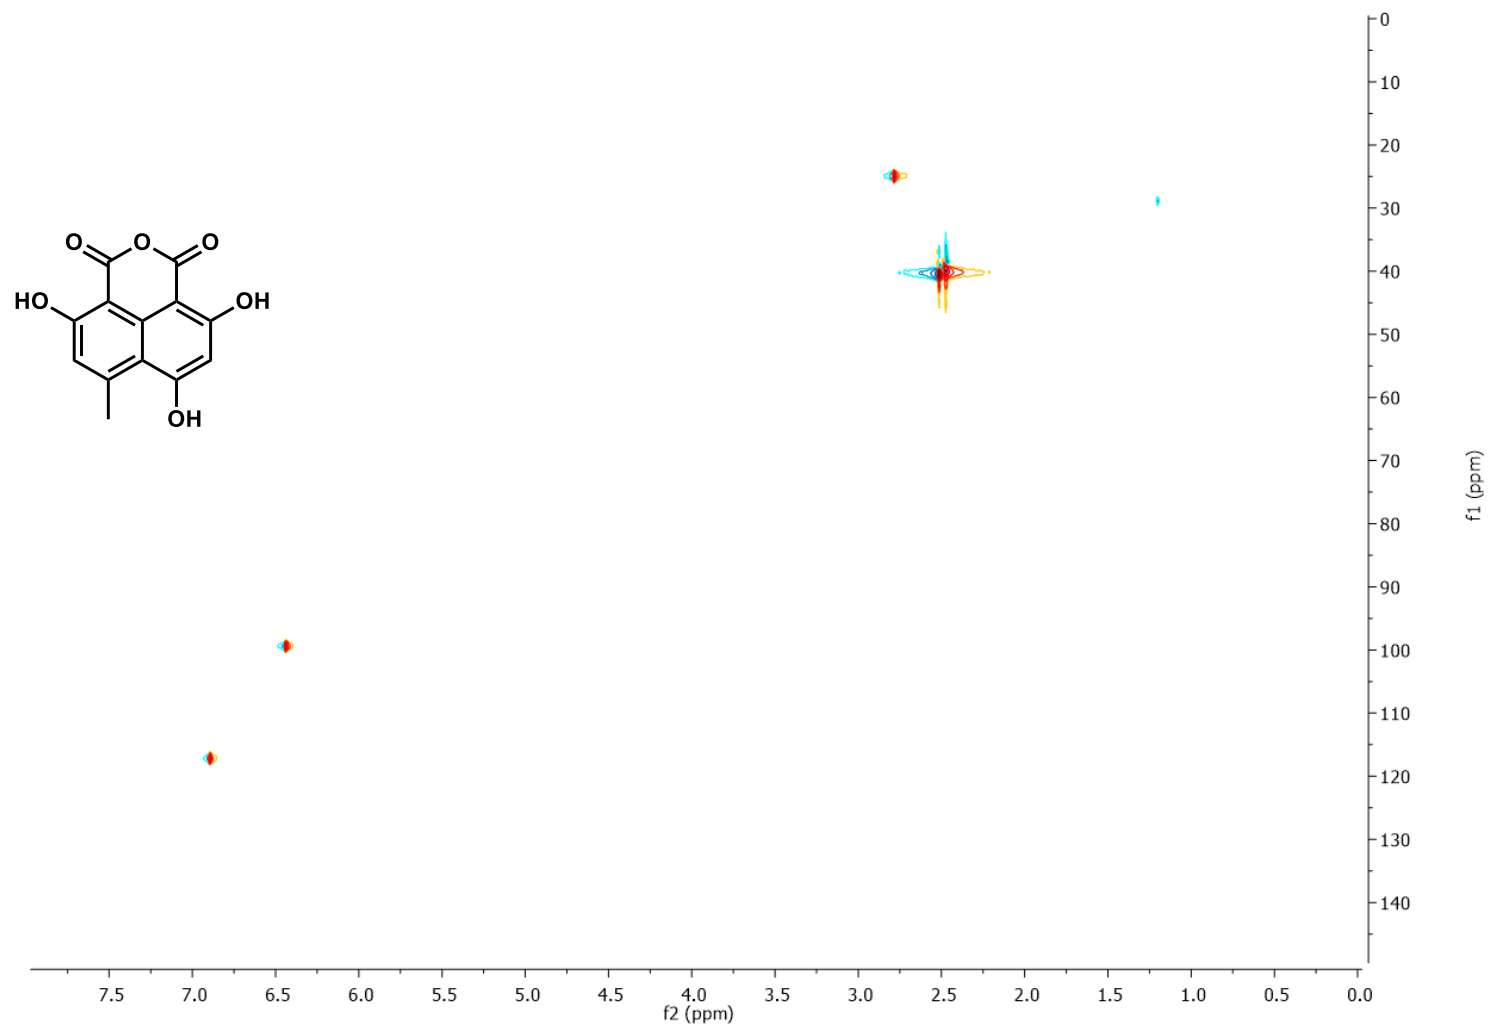

**Figure S31.** HSQC spectrum of **10** in DMSO-*d*<sub>6</sub>.

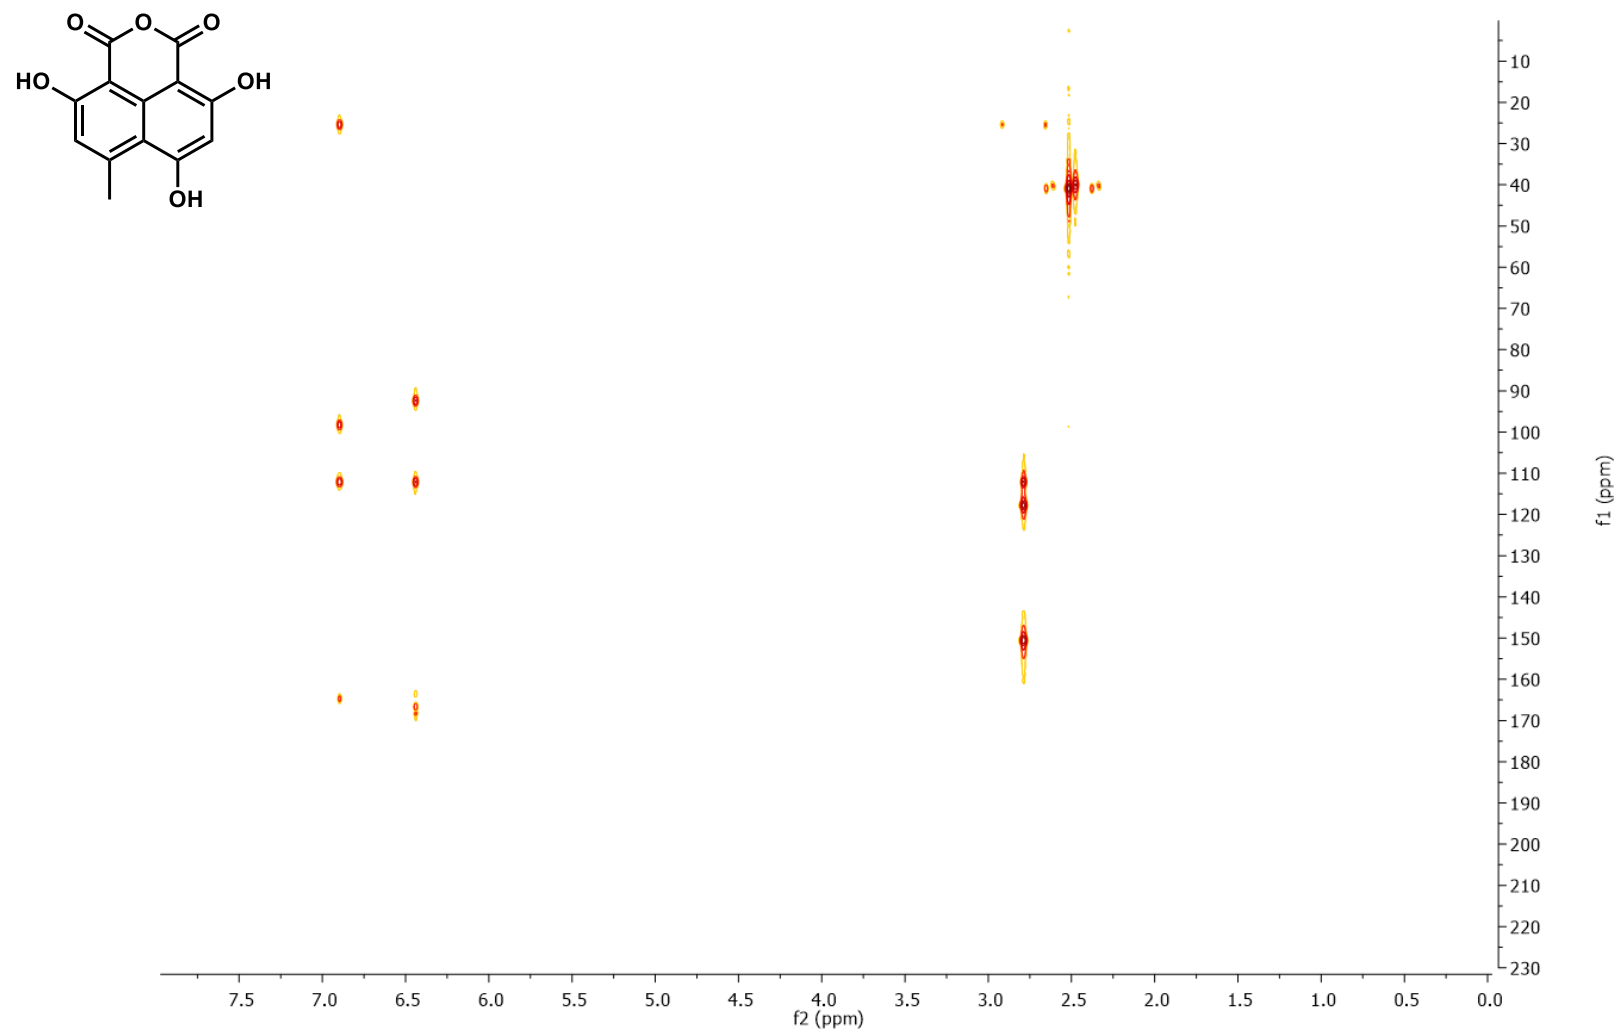

**Figure S32.** HMBC spectrum of **10** in DMSO- $d_6$ .

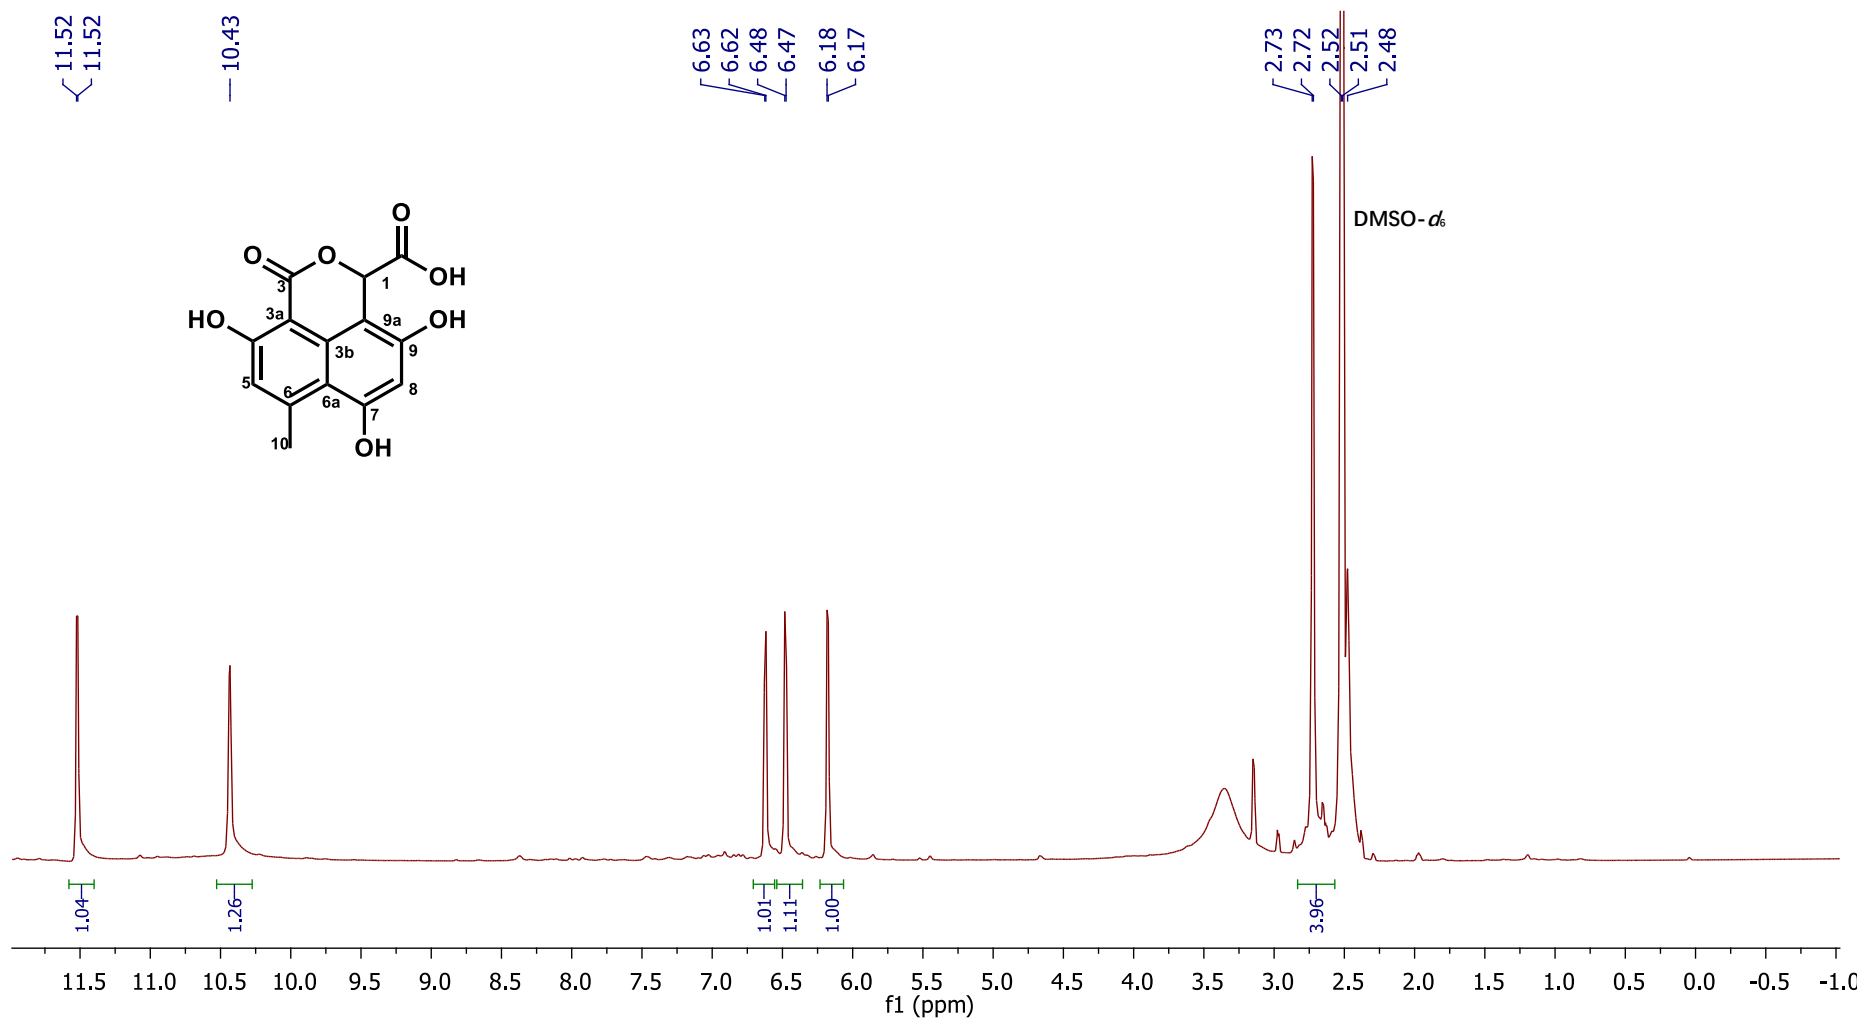

Figure S33. <sup>1</sup>H-NMR of **13** in DMSO-*d*<sub>6</sub> (500 MHz).

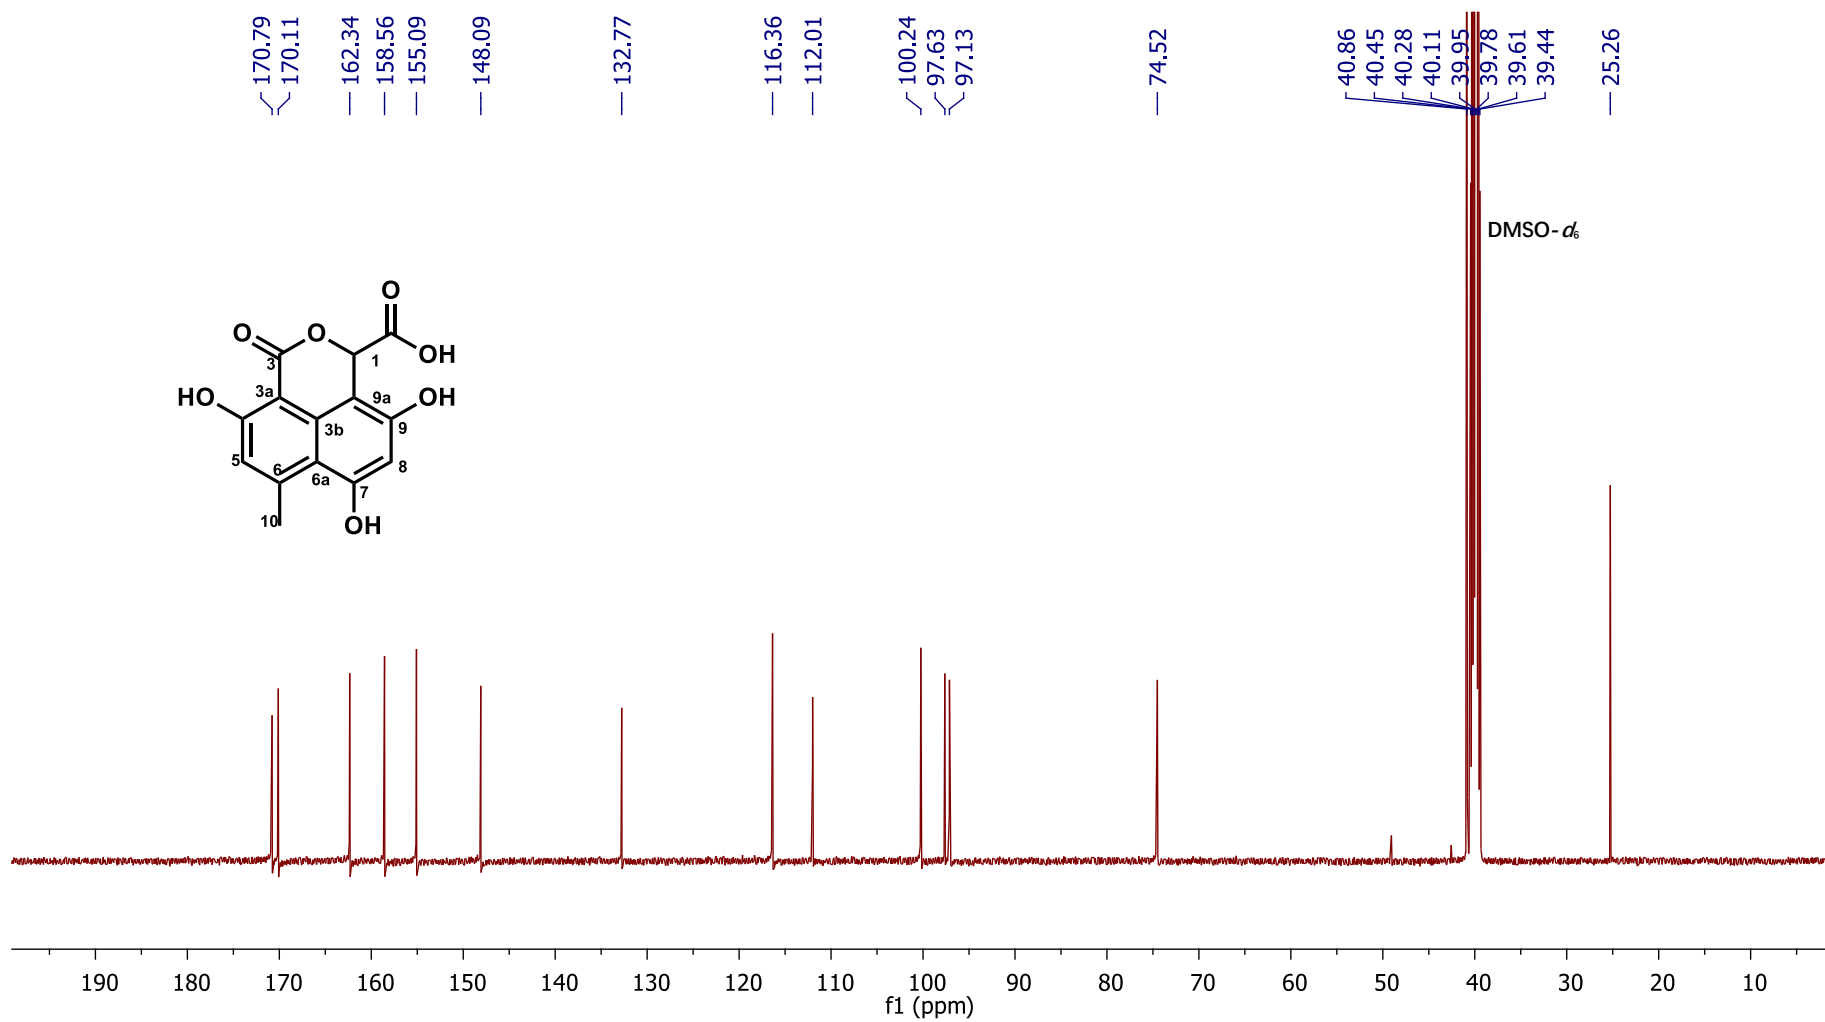

Figure S34.  $^{13}\text{C}$ -NMR of 13 in DMSO- $d_6$  (125 MHz).

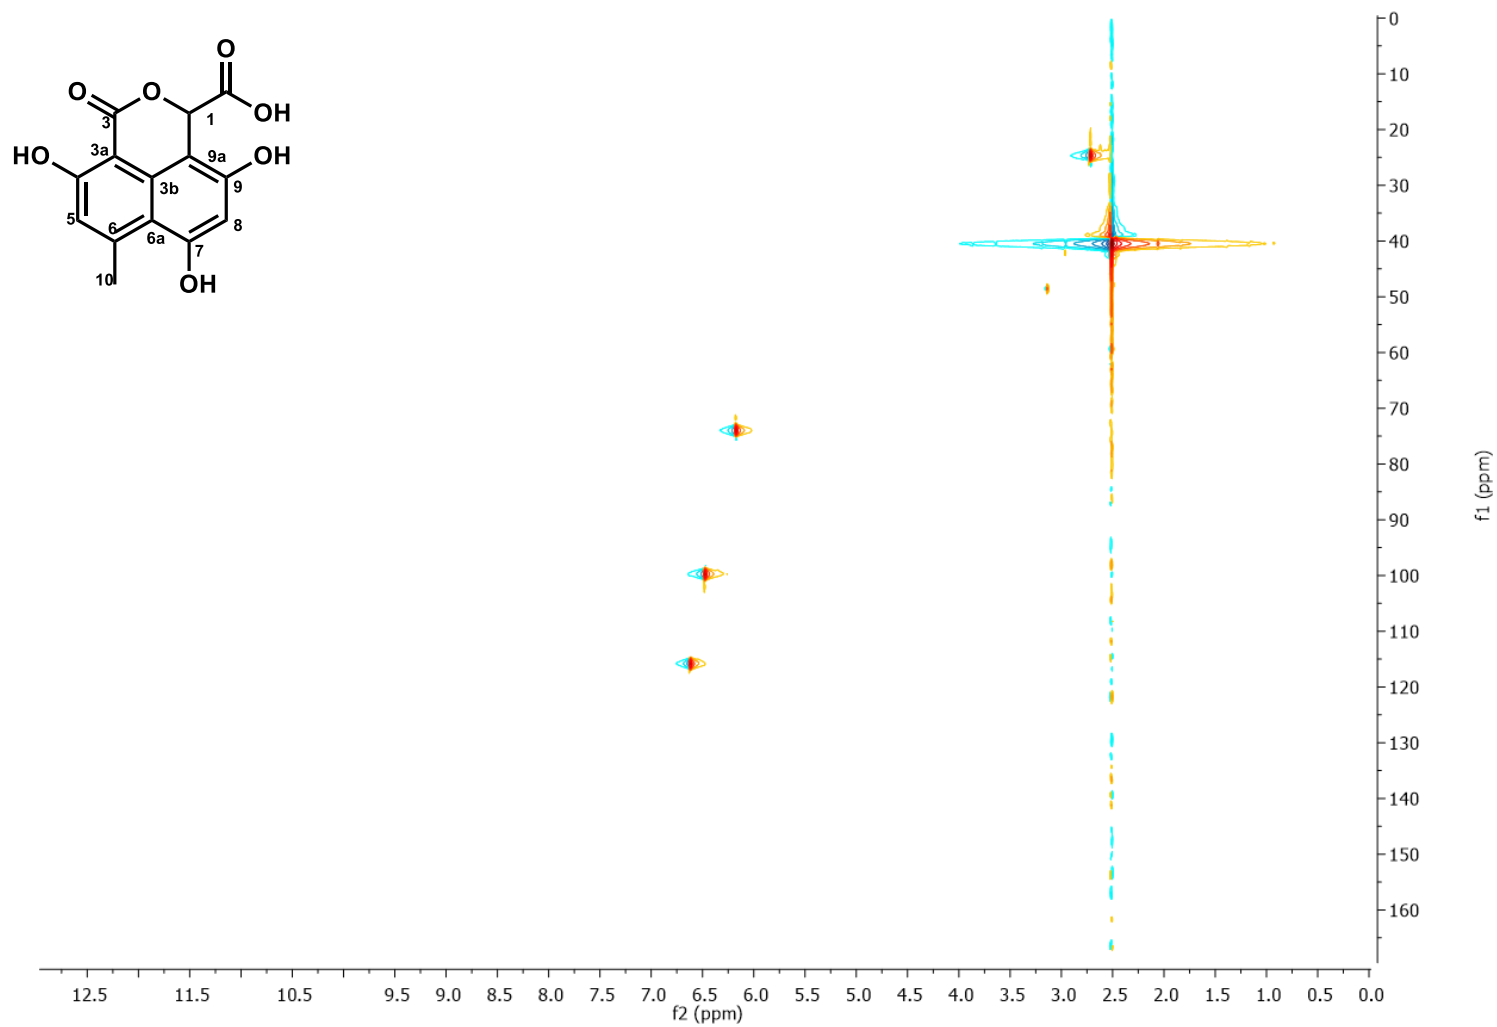

**Figure S35.** HSQC spectrum of **13** in  $\text{DMSO-}d_6$ .

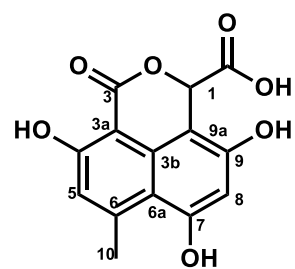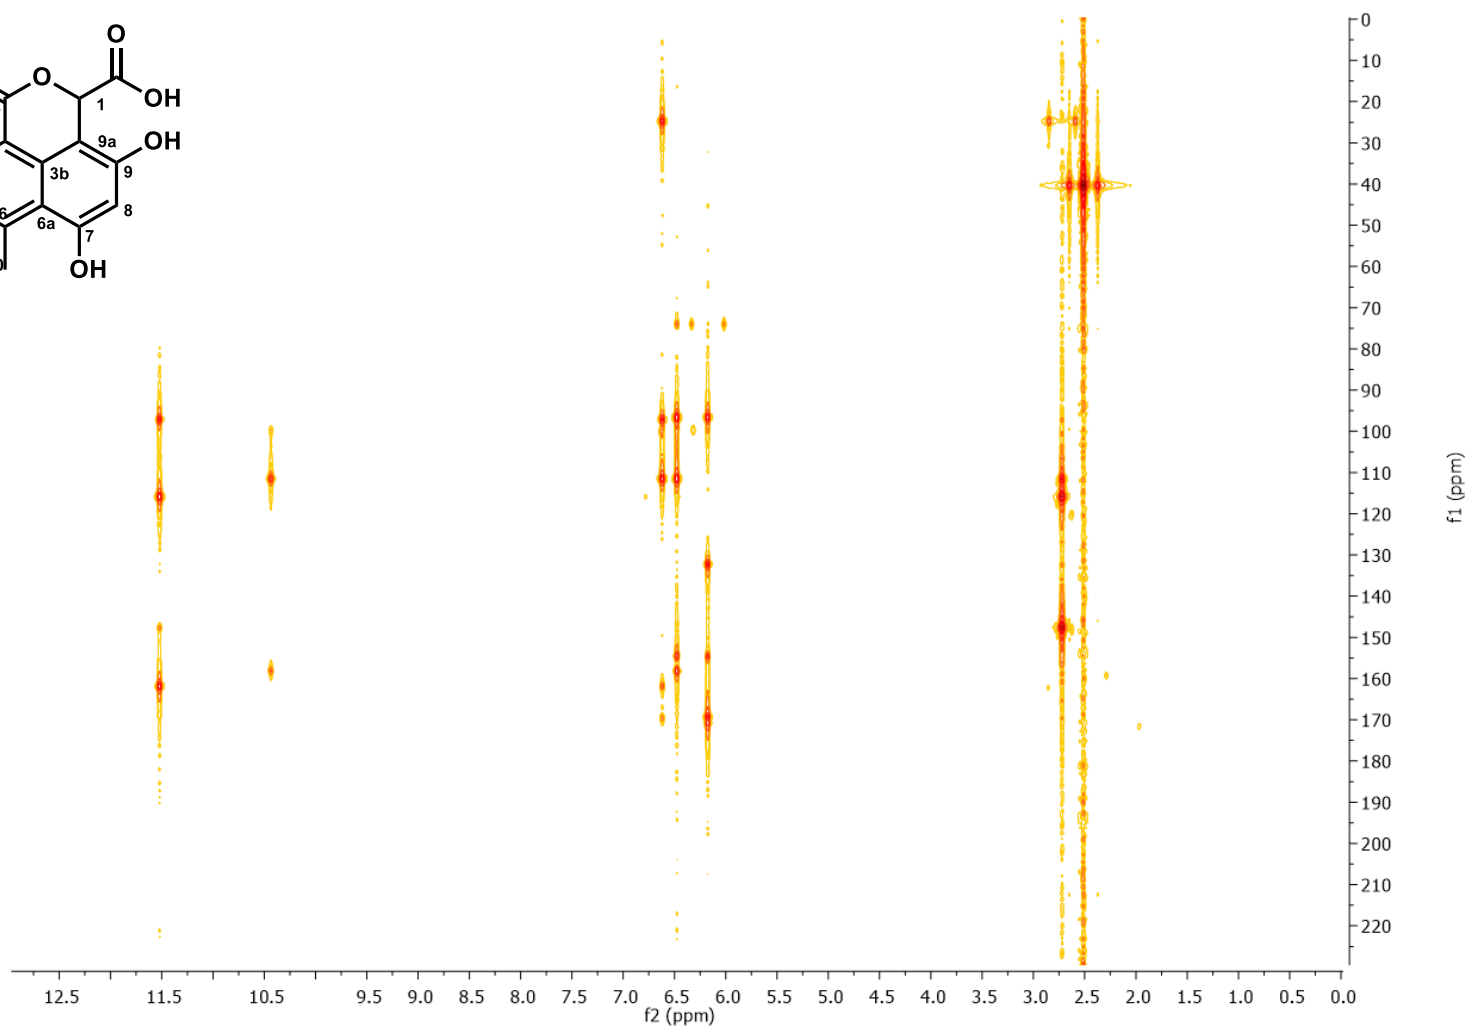

**Figure S36.** HMBC spectrum of **13** in DMSO-*d*<sub>6</sub>.



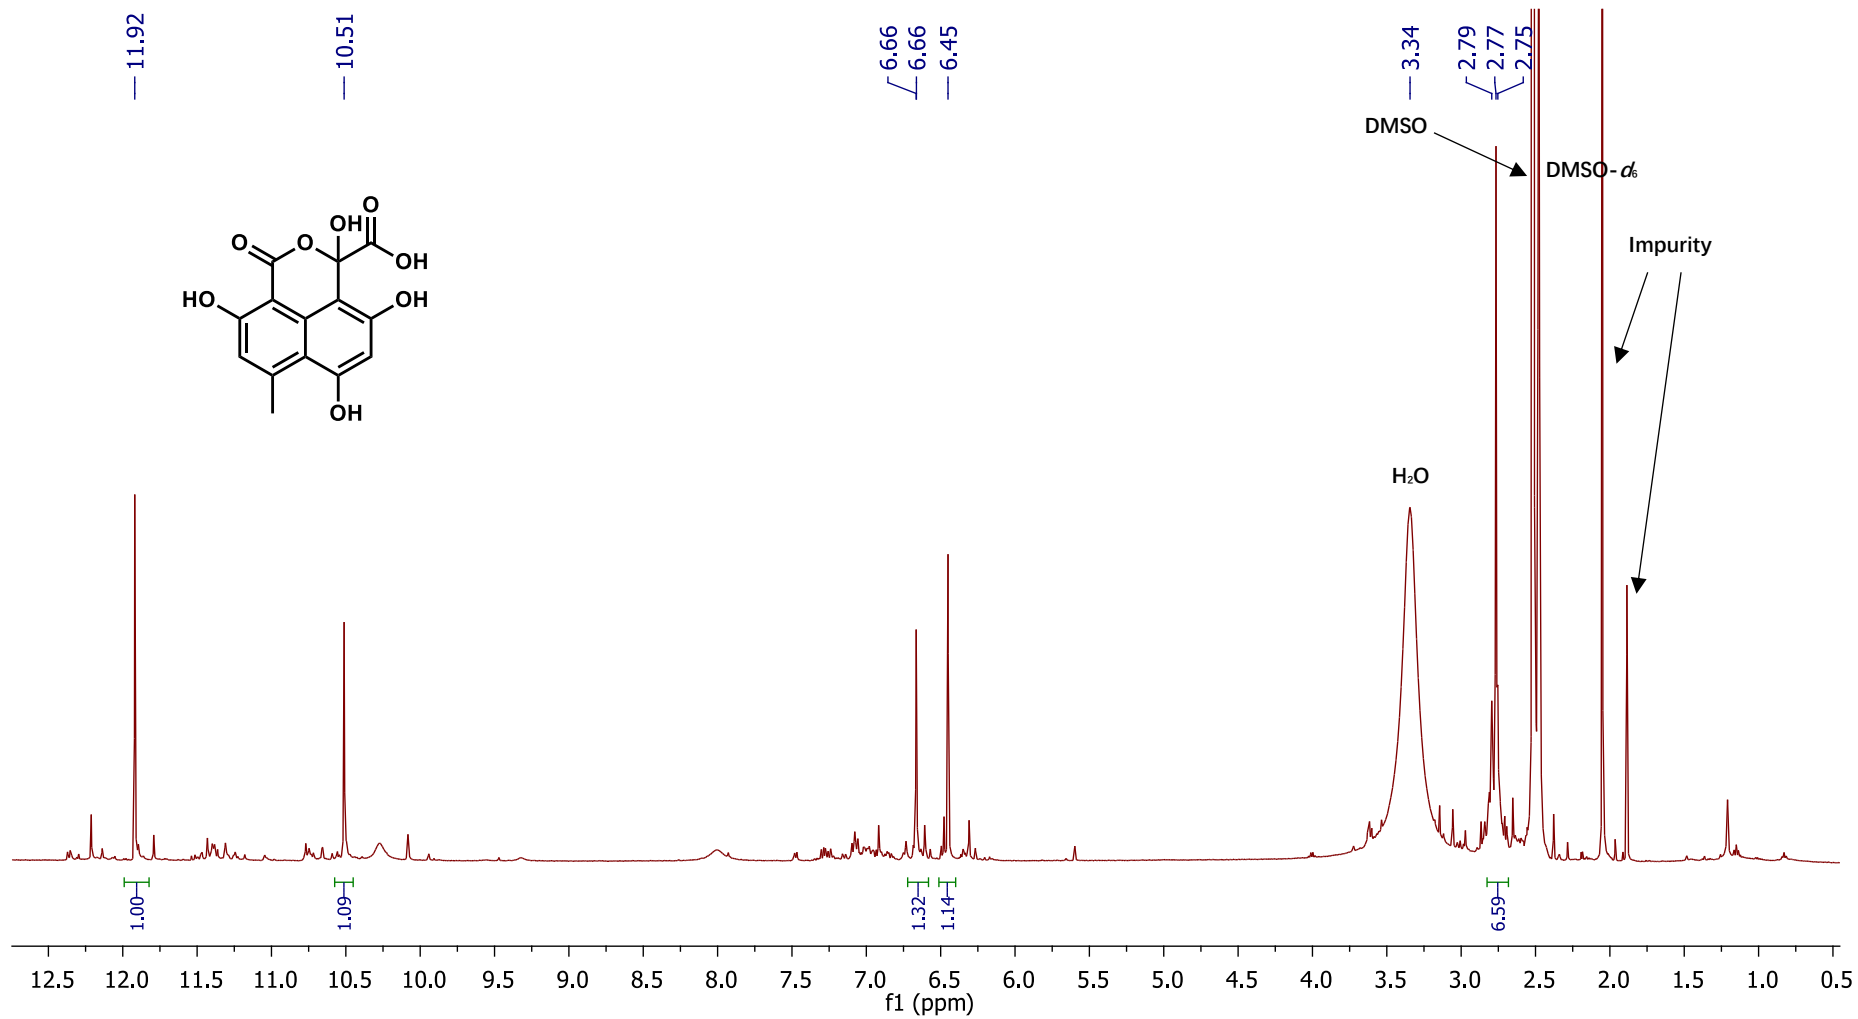

Figure S37. <sup>1</sup>H-NMR of 14 in DMSO-*d*<sub>6</sub> (500 MHz).

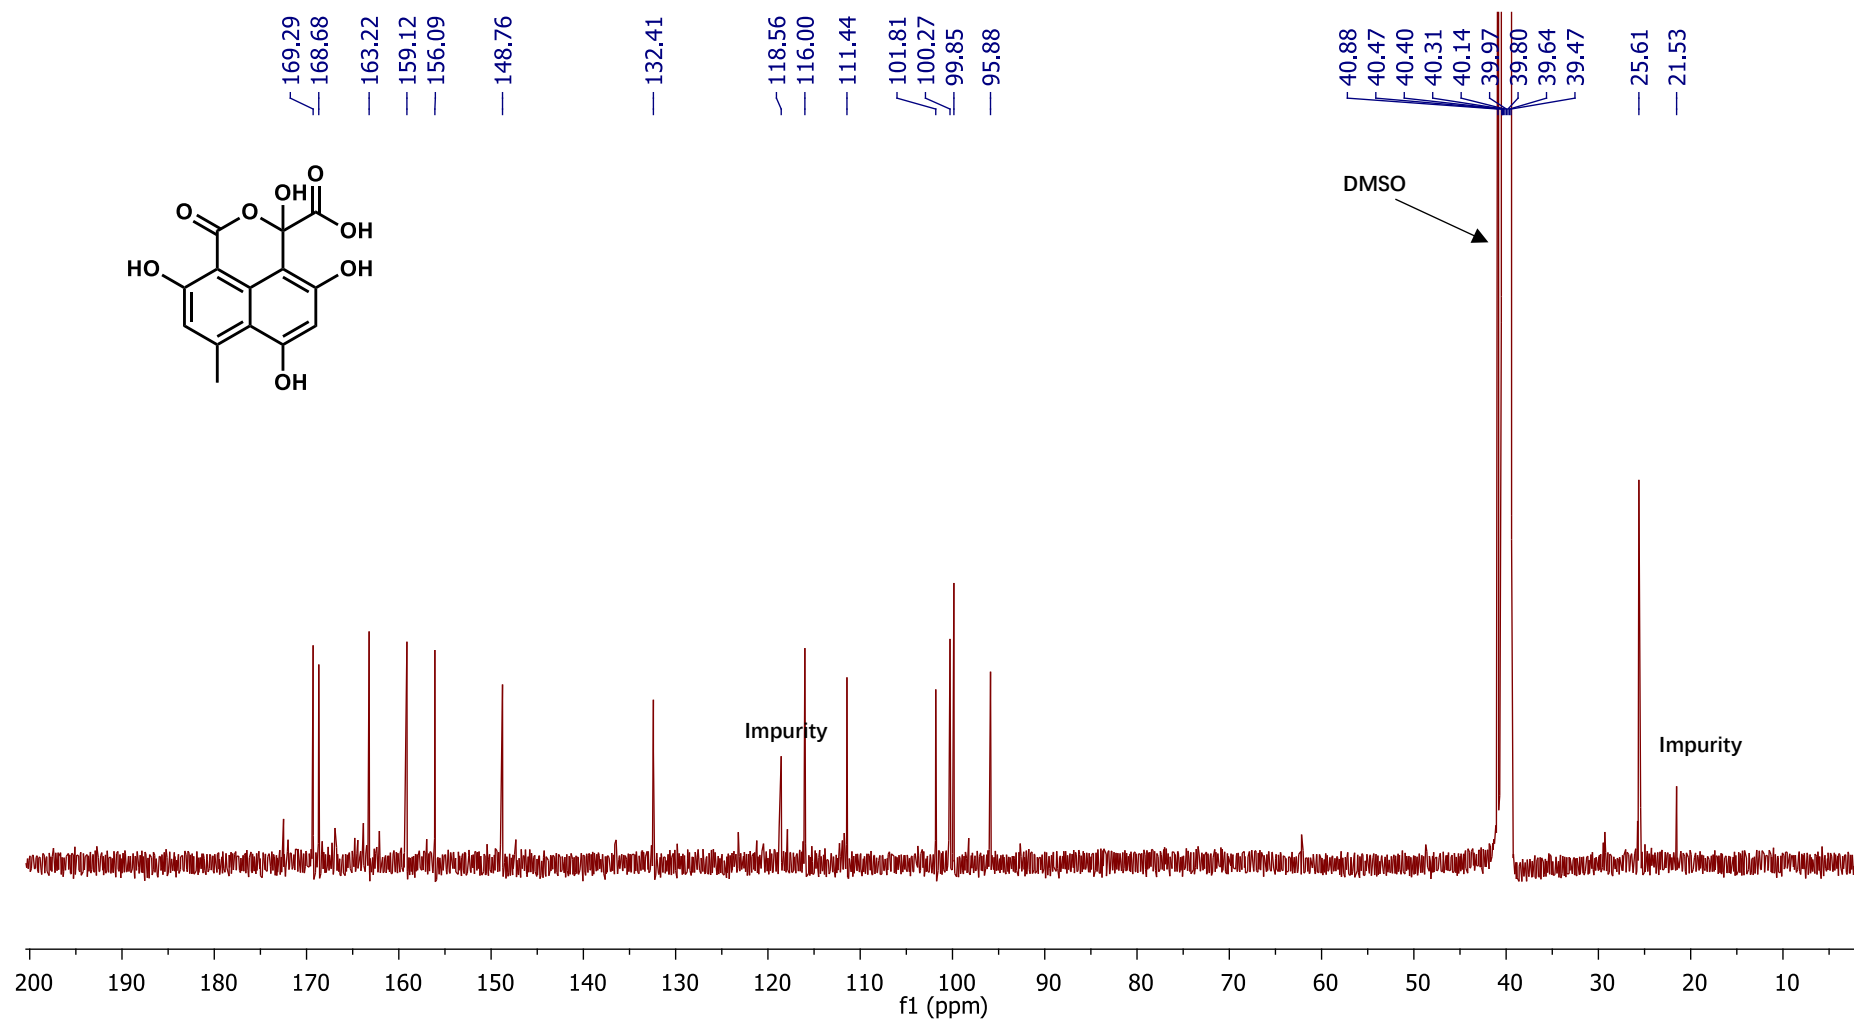

Figure S38.  $^{13}\text{C}$ -NMR of **14** in DMSO- $d_6$  (125 MHz).

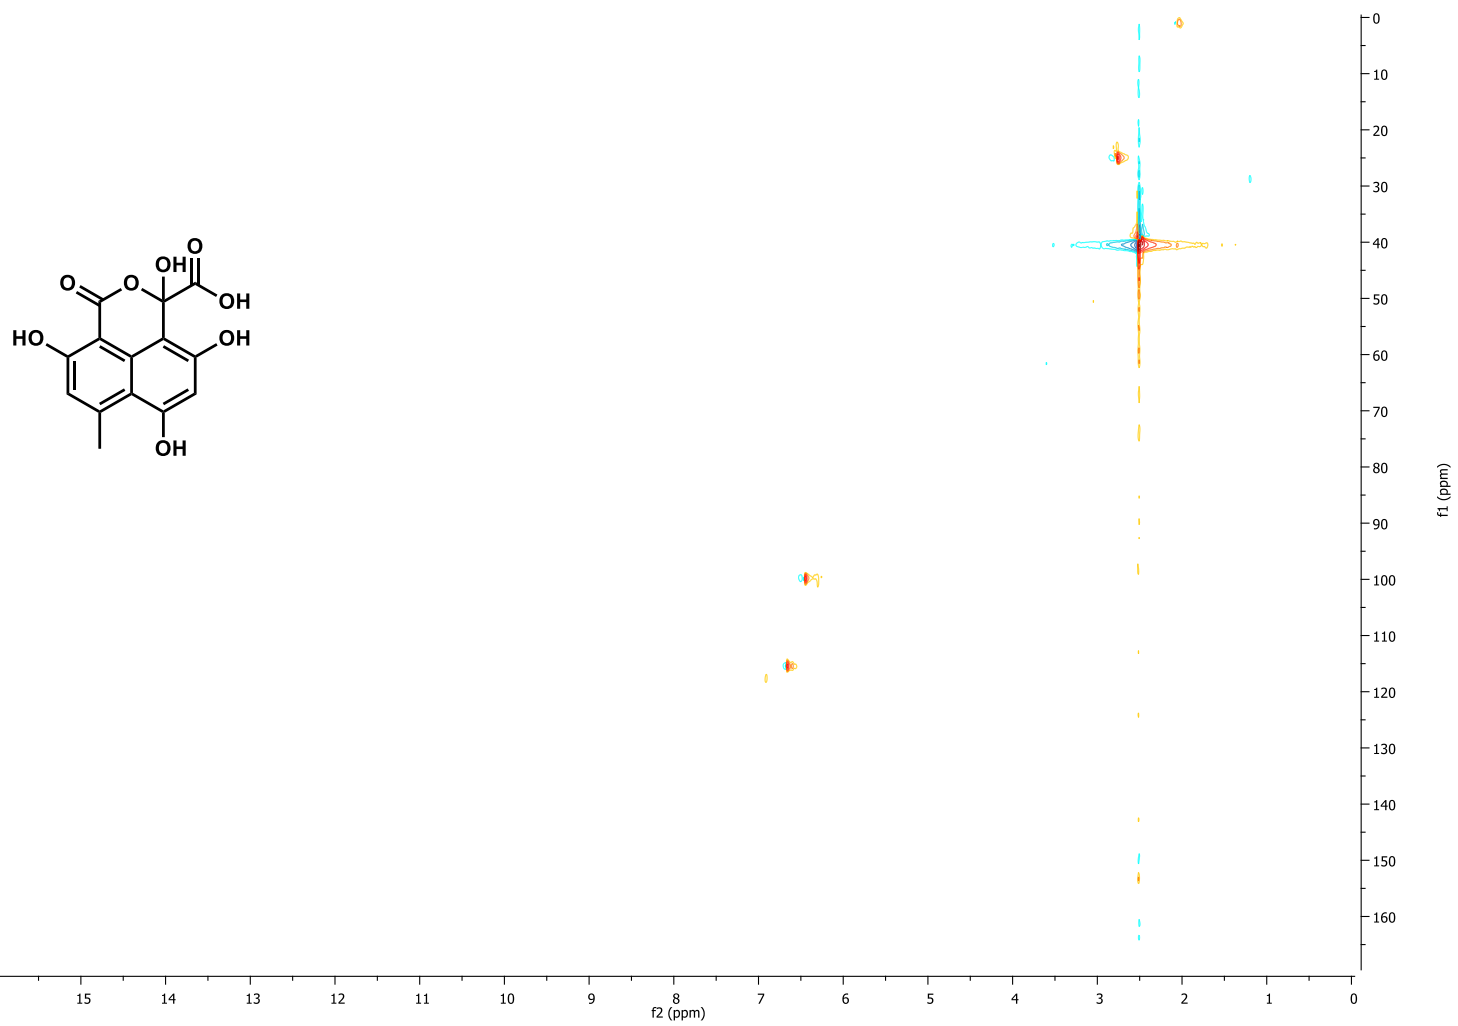

**Figure S39.** HSQC spectrum of **14** in DMSO-*d*<sub>6</sub>.

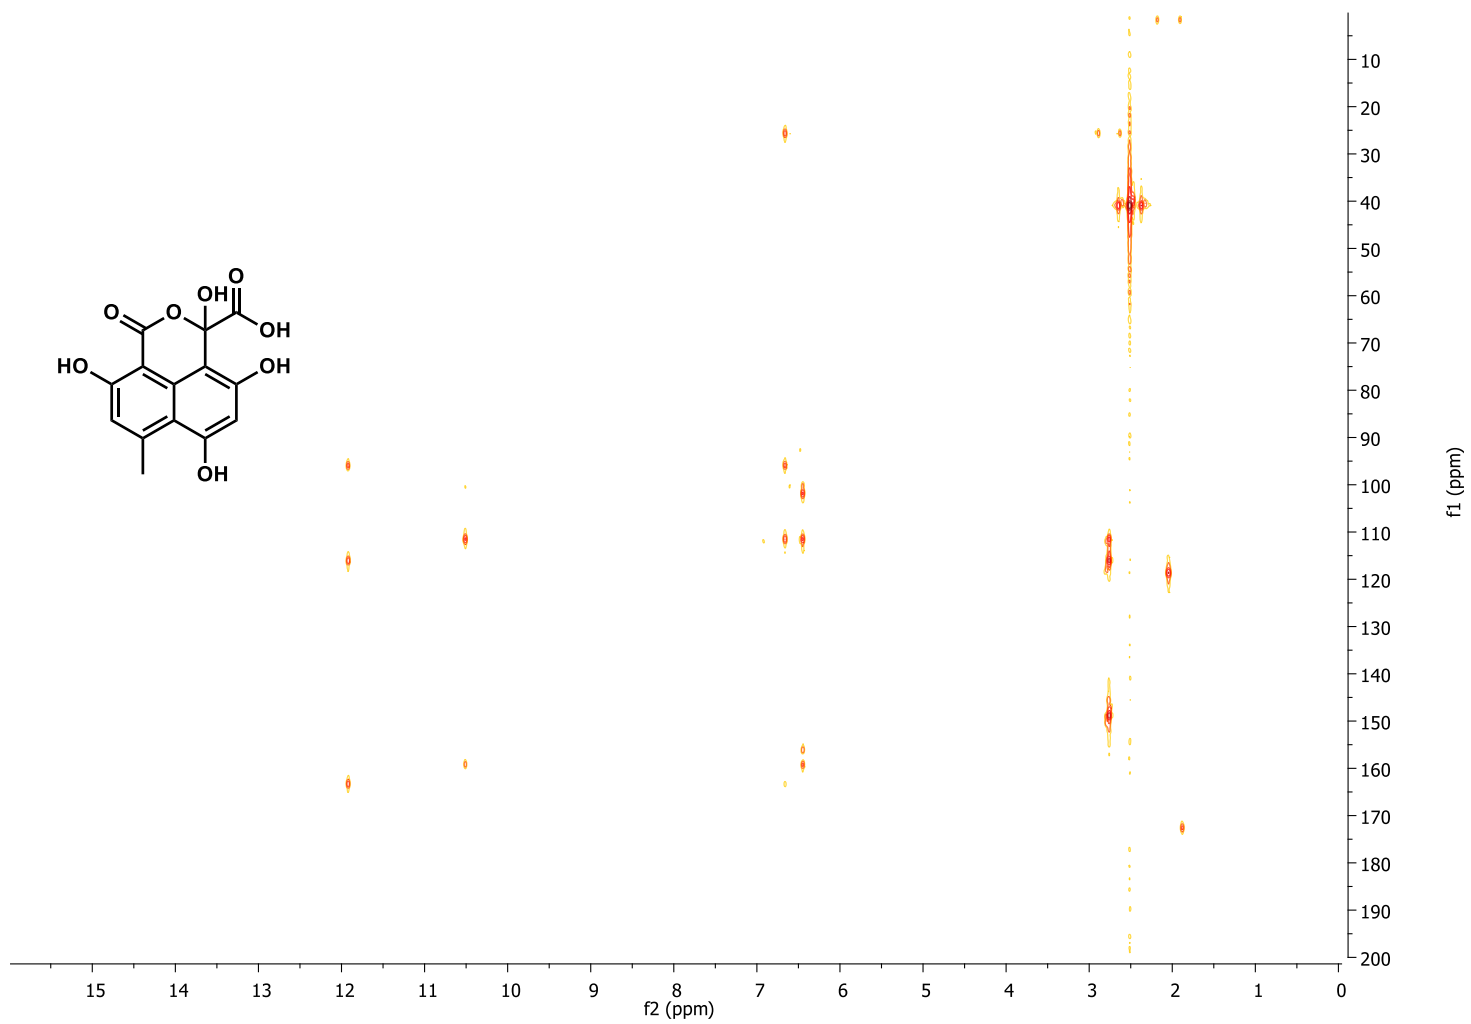

**Figure S40.** HMBC spectrum of **14** in DMSO-*d*<sub>6</sub>.

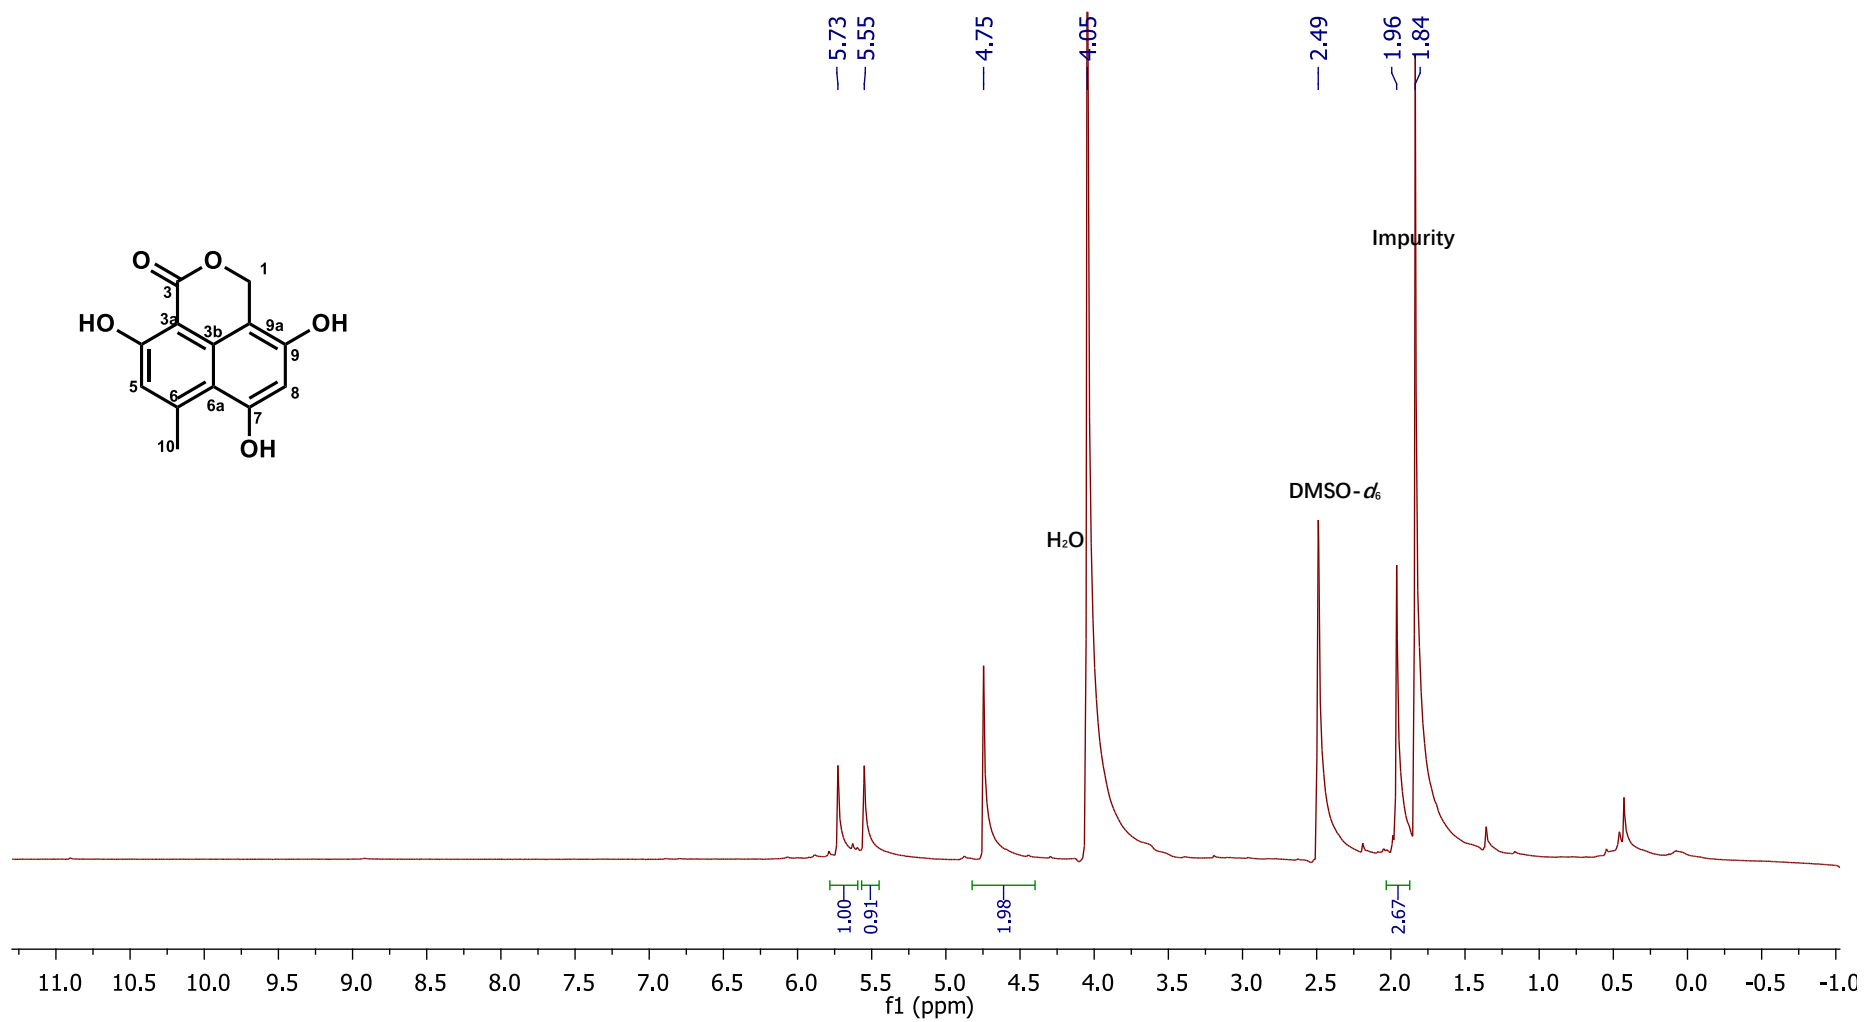

**Figure S41.** <sup>1</sup>H-NMR of **11** in DMSO-*d*<sub>6</sub> (500 MHz).

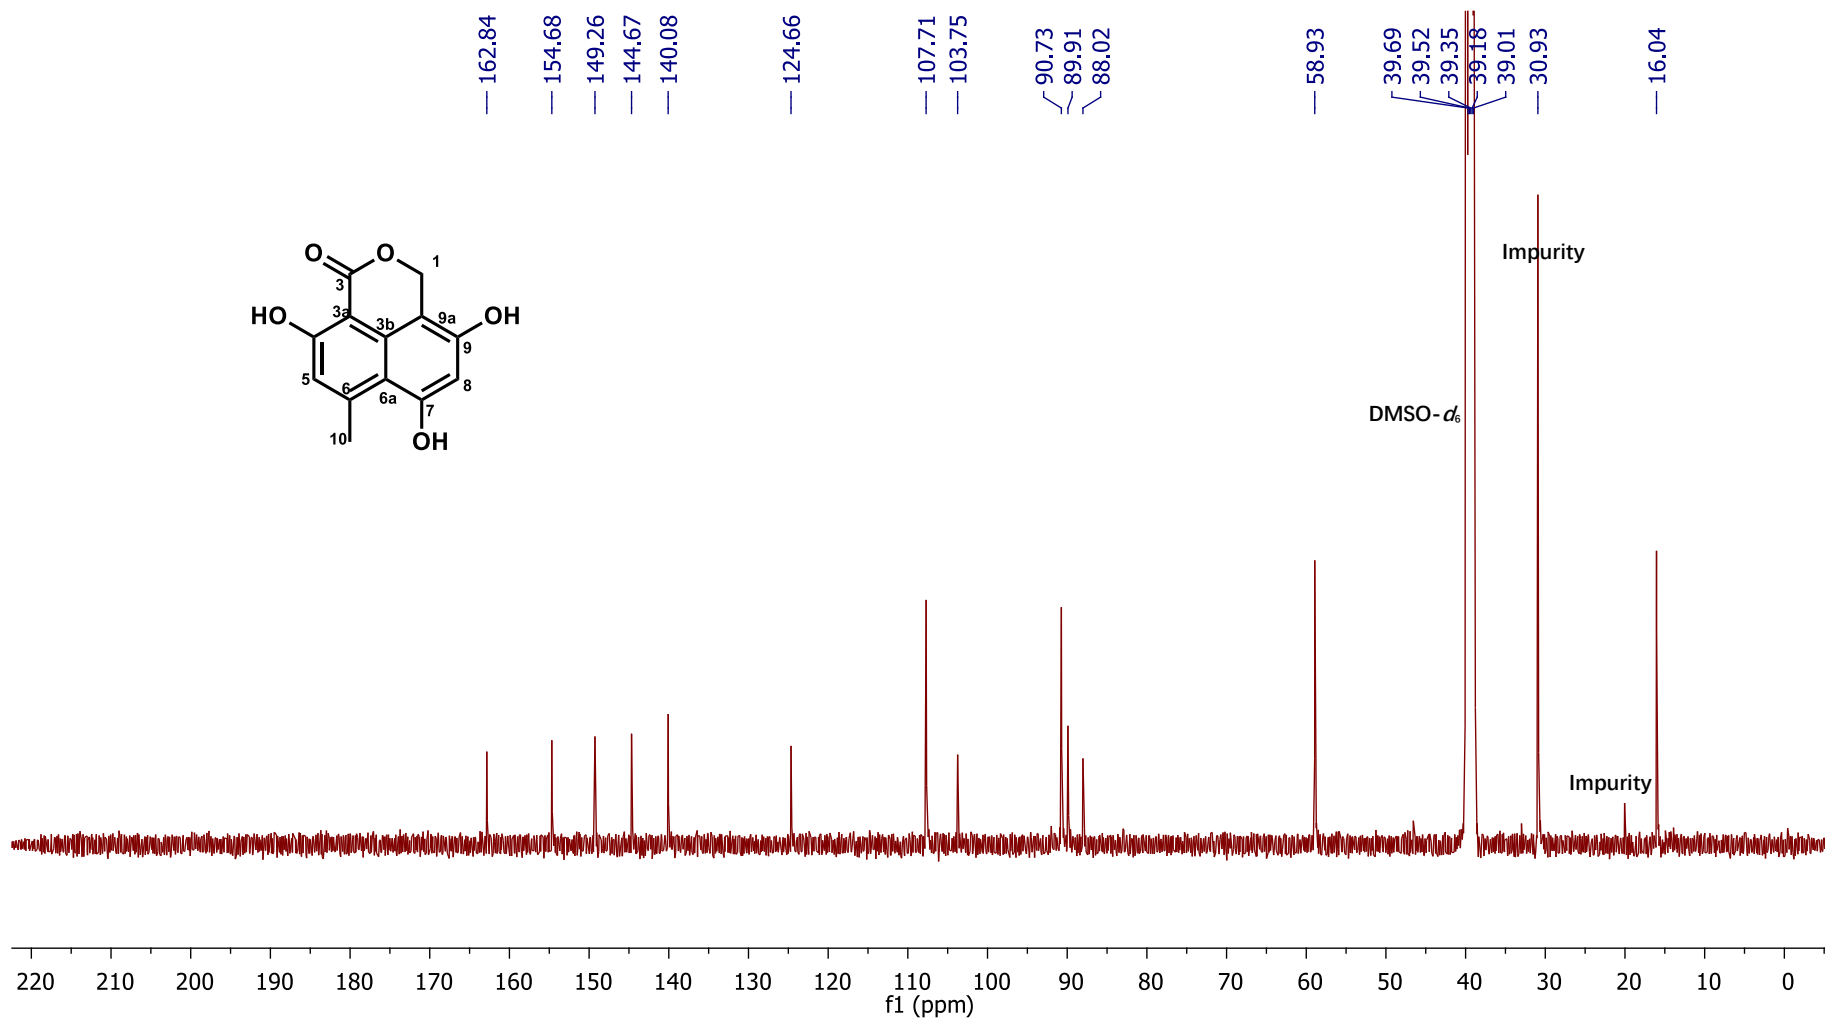

**Figure S42.**  $^{13}\text{C}$ -NMR of **11** in  $\text{DMSO-}d_6$  (125 MHz).

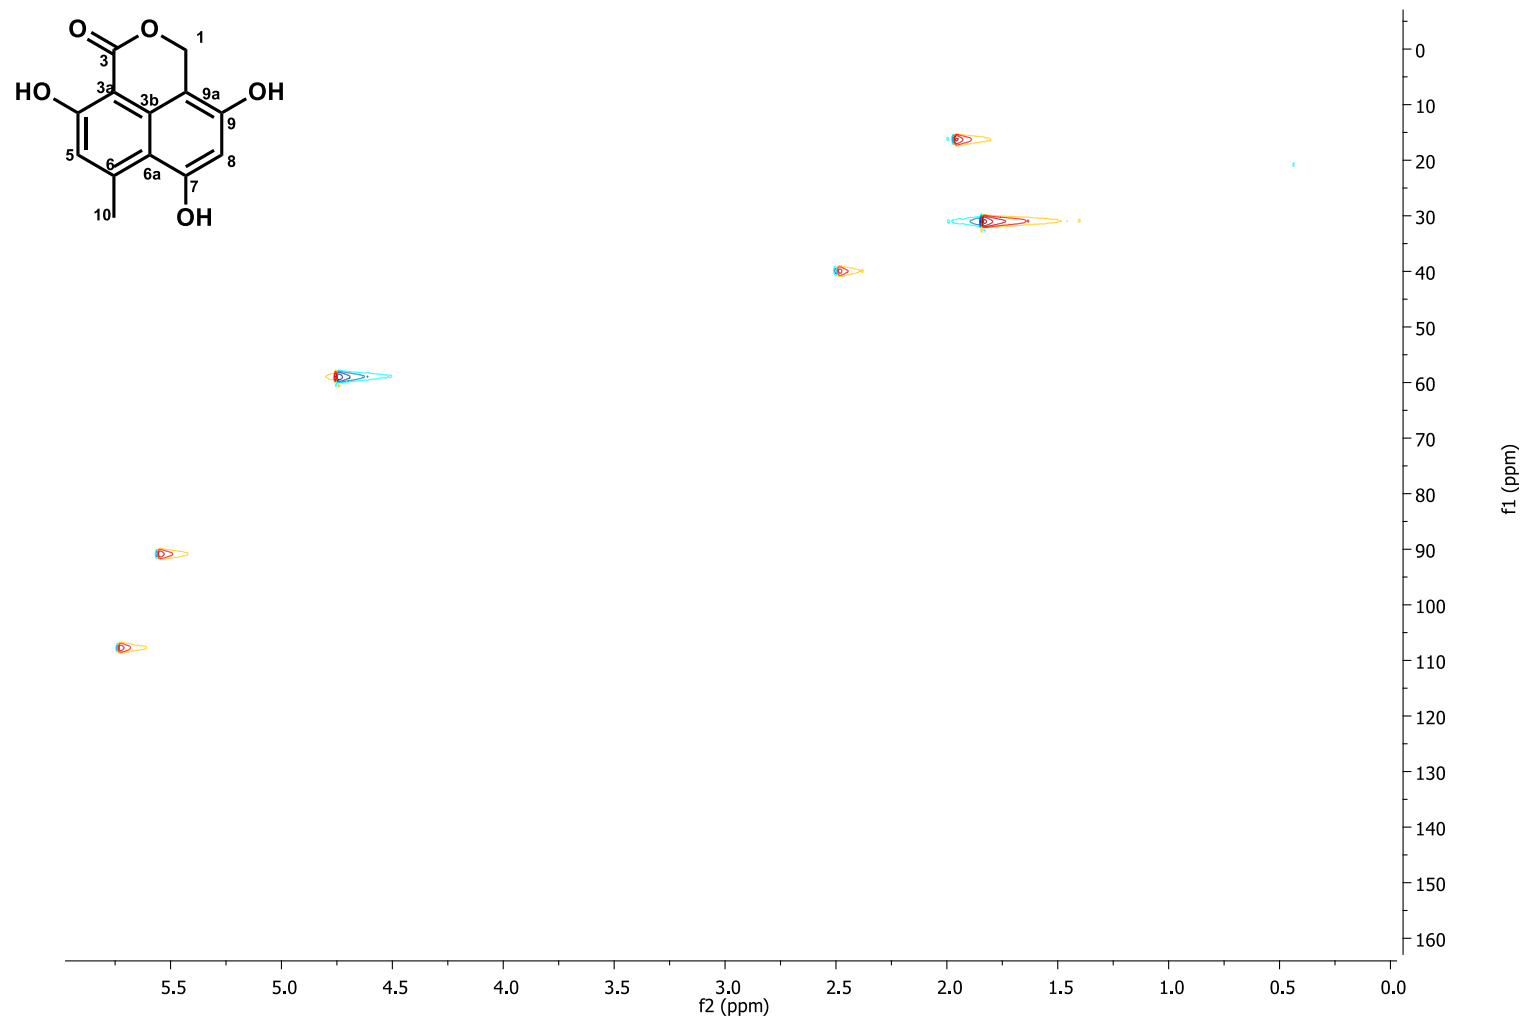

**Figure S43.** HSQC spectrum of **11** in DMSO-*d*<sub>6</sub>.

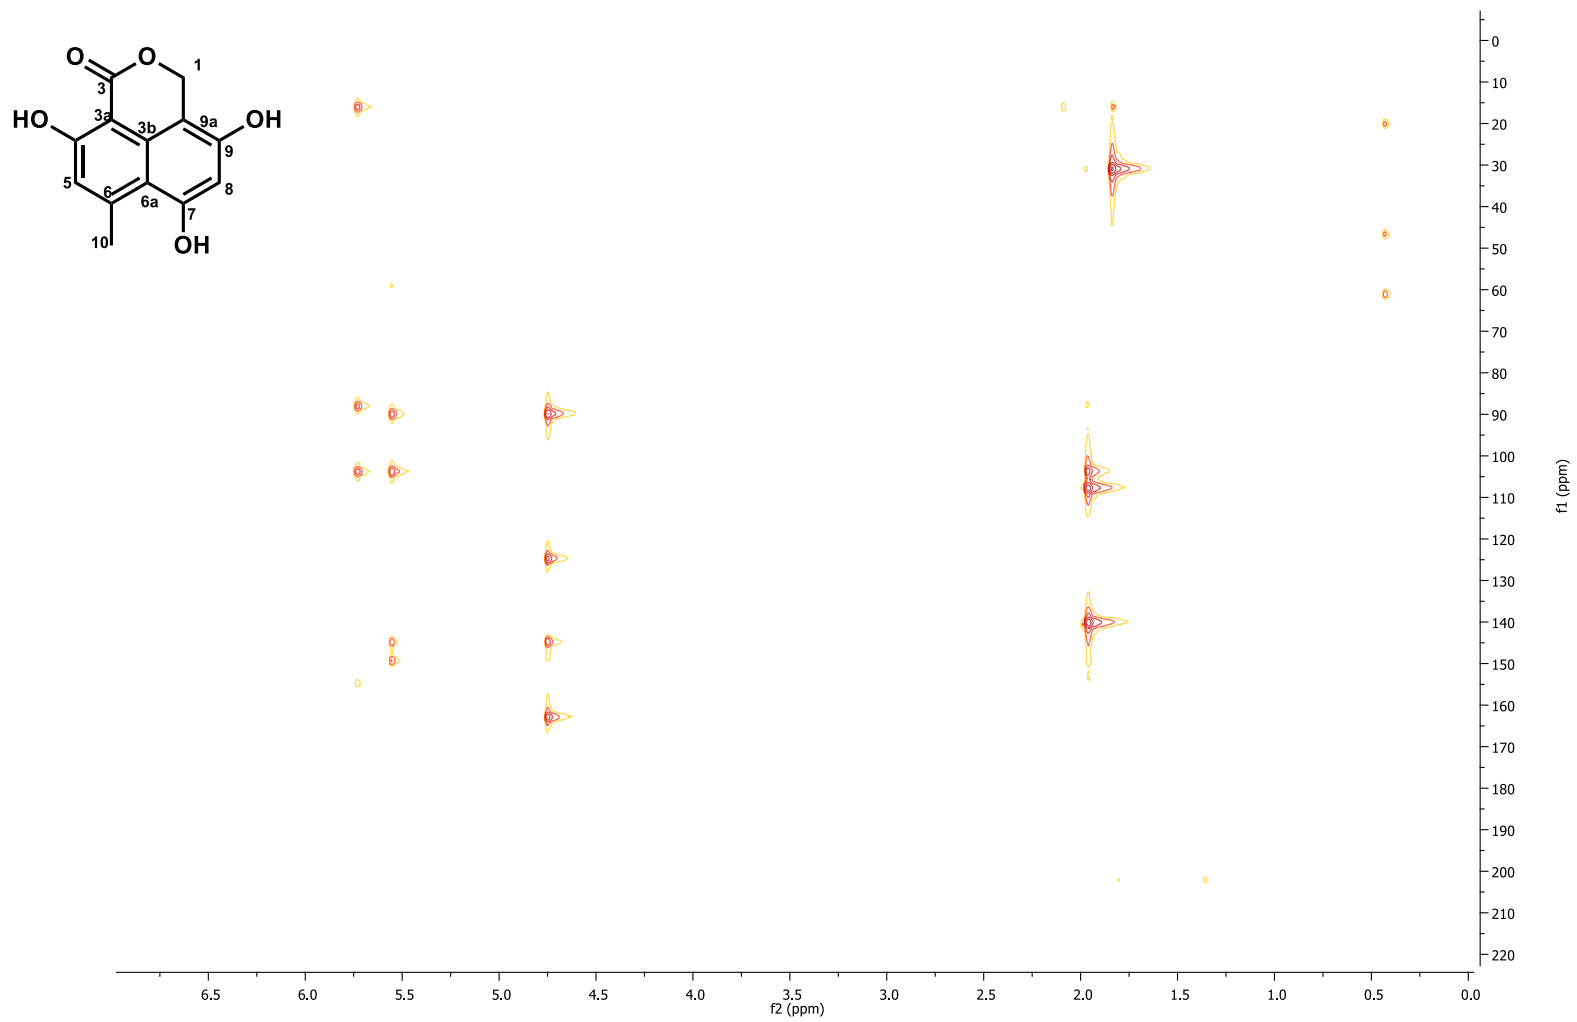

**Figure S44.** HMBC spectrum of **11** in DMSO-*d*<sub>6</sub>.



### Supplementary computational data

Cartesian coordinates, electronic energies (in a.u.) and free energies (in a.u.) of all stationary points.

| Structure                     | B3LYP/6-31G(d)-PCM(diethylether) |                       |               | B3LYP-D3BJ/6-311++G(d,p)-PCM(diethylether) // B3LYP/6-31G(d)-PCM(diethylether) |
|-------------------------------|----------------------------------|-----------------------|---------------|--------------------------------------------------------------------------------|
|                               | Energy (au)                      | Gibbs correction (au) | Gibbs Energy  | Energy (au)                                                                    |
| O <sub>2</sub> triplet        | -150.3201015                     | -0.0161960            | -150.3871002  | -94359.0957261                                                                 |
| O <sub>2</sub> <sup>-</sup>   | -150.3912337                     | -0.0170010            | -150.4974462  | -94427.8336569                                                                 |
| acetate                       | -228.5772789                     | 0.0215800             | -228.6661837  | -143503.6299330                                                                |
| acetic acid                   | -229.0863915                     | 0.0347560             | -229.1422853  | -143810.6559916                                                                |
| 7                             | -990.8804782                     | 0.1775240             | -991.0792470  | -622022.5451059                                                                |
| i                             | -990.3712924                     | 0.1622100             | -990.5975322  | -621710.6550776                                                                |
| i - radical                   | -990.2590469                     | 0.1652900             | -990.4595499  | -621626.0026552                                                                |
| ii complex                    | -1140.6973078                    | 0.1608580             | -1140.9766304 | -716074.0441833                                                                |
| iii                           | -1140.6737737                    | 0.1688040             | -1140.9513488 | -716063.1659697                                                                |
| iv                            | -1140.7030957                    | 0.1697480             | -1140.9695936 | -716075.2070830                                                                |
| 15'                           | -1140.8374258                    | 0.1655560             | -1141.1177625 | -716165.5539086                                                                |
| 15                            | -1140.3034811                    | 0.1545750             | -1140.6126470 | -715841.6986849                                                                |
| 12                            | -1140.8475409                    | 0.1697450             | -1141.1196707 | -716169.3799377                                                                |
| H <sub>2</sub> O              | -76.4140002                      | 0.0028200             | -76.4616122   | -47982.1193930                                                                 |
| H <sub>3</sub> O <sup>+</sup> | -76.7849471                      | 0.0156030             | -76.8121073   | -48210.0796483                                                                 |
| OH <sup>-</sup>               | -75.8254004                      | -0.0082780            | -75.9368789   | -47645.8804021                                                                 |

**Cartesian coordinates of optimized geometries:**

12

|   |          |          |          |
|---|----------|----------|----------|
| C | -0.34560 | -2.78371 | -0.15751 |
| C | -1.57762 | -2.18204 | -0.05854 |
| C | -1.71008 | -0.75792 | 0.00146  |
| C | -0.49537 | 0.01514  | -0.10992 |
| C | 0.76897  | -0.62010 | -0.22385 |
| C | 0.84570  | -2.02421 | -0.19701 |
| H | -0.25608 | -3.86727 | -0.16274 |
| C | -2.95979 | -0.07898 | 0.17241  |
| C | -0.55857 | 1.45201  | -0.09714 |
| C | -1.79550 | 2.07394  | 0.08068  |
| C | -2.96668 | 1.29974  | 0.21855  |
| H | -3.91246 | 1.82004  | 0.35847  |
| C | 0.65740  | 2.24999  | -0.33825 |
| O | 0.69512  | 3.46658  | -0.40852 |
| O | 1.81203  | 1.58584  | -0.57523 |
| C | 2.04782  | 0.18145  | -0.37967 |
| O | 2.78117  | -0.23970 | -1.51008 |
| C | 3.00748  | 0.01345  | 0.86459  |
| O | 3.55926  | -1.13706 | 0.93407  |
| O | 3.11436  | 0.95881  | 1.65187  |
| C | -4.29291 | -0.77951 | 0.32211  |
| H | -4.53577 | -1.38196 | -0.55787 |
| H | -4.29786 | -1.46242 | 1.17629  |
| H | -5.08653 | -0.03979 | 0.46509  |
| O | -1.89833 | 3.42701  | 0.11907  |
| H | -2.83294 | 3.65327  | 0.25876  |
| O | 1.98791  | -2.71491 | -0.20984 |
| O | -2.71217 | -2.94598 | 0.00020  |
| H | -2.44858 | -3.88025 | -0.02860 |
| H | 2.14910  | -0.30606 | -2.24653 |

H 2.75484 -2.09571 0.13740

7

C -1.51878 -2.53311 -0.00026  
C -2.26693 -1.36985 0.00002  
C -1.66312 -0.06453 0.00030  
C -0.22609 -0.00914 0.00015  
C 0.53655 -1.21657 0.00030  
C -0.11945 -2.47036 -0.00018  
H -2.00124 -3.50615 -0.00060  
C -2.41269 1.15231 0.00020  
C 0.46252 1.25317 0.00023  
C -0.31733 2.42526 -0.00014  
C -1.71845 2.35099 -0.00005  
H -2.27882 3.28339 -0.00021  
C 1.90820 1.25712 0.00013  
O 2.58710 2.43159 -0.00033  
C 1.97844 -1.19360 0.00019  
C -3.92243 1.23188 0.00033  
H -4.35407 0.73924 -0.87563  
H -4.35387 0.74057 0.87713  
H -4.23844 2.27887 -0.00044  
O 0.29018 3.63416 -0.00054  
H -0.39121 4.32718 -0.00073  
O 0.56902 -3.61218 -0.00048  
O -3.62028 -1.44165 -0.00006  
H -3.88888 -2.37591 -0.00027  
H 1.54608 -3.34784 -0.00047  
C 2.61407 0.08093 0.00064  
H 3.53624 2.20701 -0.00092  
O 2.71132 -2.24188 -0.00002  
O 3.98309 0.11872 0.00031

|   |         |          |          |
|---|---------|----------|----------|
| H | 4.25372 | -0.82344 | -0.00001 |
|---|---------|----------|----------|

acetate

|   |          |          |          |
|---|----------|----------|----------|
| C | 0.20525  | 0.00256  | -0.00631 |
| O | 0.81317  | -1.10056 | -0.02086 |
| O | 0.69970  | 1.16194  | 0.02508  |
| C | -1.35302 | -0.05533 | 0.00146  |
| H | -1.72978 | 0.27111  | 0.98085  |
| H | -1.76628 | 0.63916  | -0.74105 |
| H | -1.73348 | -1.06375 | -0.19579 |

acetic acid

|   |          |          |          |
|---|----------|----------|----------|
| C | 0.09184  | 0.12337  | -0.00000 |
| O | 0.64388  | 1.20387  | 0.00000  |
| O | 0.77956  | -1.04402 | 0.00000  |
| H | 1.72764  | -0.81089 | -0.00001 |
| C | -1.39664 | -0.11132 | 0.00000  |
| H | -1.68348 | -0.69272 | -0.88230 |
| H | -1.68346 | -0.69265 | 0.88234  |
| H | -1.91935 | 0.84522  | -0.00004 |

3

H2O

|   |          |         |         |
|---|----------|---------|---------|
| O | -0.90905 | 0.76634 | 0.00000 |
| H | 0.05877  | 0.81950 | 0.00000 |
| H | -1.18199 | 1.69638 | 0.00000 |

H3O+

|   |          |         |          |
|---|----------|---------|----------|
| O | -0.89030 | 0.79236 | -0.01270 |
| H | 0.03890  | 0.70724 | -0.33172 |
| H | -1.28139 | 1.63970 | -0.33186 |
| H | -1.42962 | 0.03040 | -0.33172 |

i

|   |          |          |          |
|---|----------|----------|----------|
| C | -1.55296 | -2.48857 | 0.00001  |
| C | -2.27764 | -1.31522 | 0.00019  |
| C | -1.64554 | -0.02485 | 0.00004  |
| C | -0.20802 | -0.00819 | -0.00002 |
| C | 0.54413  | -1.22290 | -0.00006 |
| C | -0.14394 | -2.45944 | -0.00011 |
| H | -2.05424 | -3.45341 | 0.00015  |
| C | -2.36767 | 1.20890  | -0.00016 |
| C | 0.52426  | 1.23483  | 0.00006  |
| C | -0.23281 | 2.42187  | 0.00003  |
| C | -1.63471 | 2.38730  | -0.00017 |
| H | -2.16861 | 3.33701  | -0.00039 |
| C | 1.95116  | 1.18189  | 0.00009  |
| O | 2.73052  | 2.30230  | 0.00013  |
| C | 2.00301  | -1.25478 | -0.00009 |
| C | -3.87623 | 1.32909  | -0.00044 |
| H | -4.32858 | 0.85323  | -0.87647 |
| H | -4.32886 | 0.85378  | 0.87575  |
| H | -4.16174 | 2.38623  | -0.00081 |
| O | 0.40915  | 3.62720  | 0.00011  |
| H | -0.26545 | 4.32575  | 0.00004  |
| O | 0.51794  | -3.61315 | -0.00022 |
| O | -3.64224 | -1.36425 | 0.00063  |
| H | -3.91280 | -2.29722 | 0.00075  |

|   |         |          |          |
|---|---------|----------|----------|
| H | 1.53054 | -3.30721 | -0.00022 |
| C | 2.72253 | 0.00040  | 0.00007  |
| H | 3.62820 | 1.84922  | 0.00013  |
| O | 2.62791 | -2.38080 | -0.00019 |
| O | 4.01024 | 0.11751  | 0.00012  |

i - radical

|   |          |          |          |
|---|----------|----------|----------|
| C | -1.57506 | -2.48461 | 0.00035  |
| C | -2.27973 | -1.29809 | 0.00026  |
| C | -1.62332 | -0.01593 | -0.00009 |
| C | -0.18760 | -0.01538 | -0.00003 |
| C | 0.53922  | -1.24856 | -0.00012 |
| C | -0.17390 | -2.47573 | 0.00029  |
| H | -2.08981 | -3.44067 | 0.00053  |
| C | -2.33350 | 1.22790  | -0.00038 |
| C | 0.53175  | 1.23774  | -0.00015 |
| C | -0.21155 | 2.44089  | 0.00021  |
| C | -1.60981 | 2.41096  | -0.00012 |
| H | -2.14506 | 3.35726  | -0.00015 |
| C | 1.95245  | 1.20558  | -0.00031 |
| O | 2.69886  | 2.30735  | 0.00044  |
| C | 1.98899  | -1.30239 | -0.00025 |
| C | -3.83922 | 1.35373  | -0.00089 |
| H | -4.28385 | 0.87389  | -0.87724 |
| H | -4.28442 | 0.87410  | 0.87529  |
| H | -4.12321 | 2.40941  | -0.00109 |
| O | 0.44822  | 3.61583  | 0.00093  |
| H | -0.19575 | 4.34455  | 0.00127  |
| O | 0.45404  | -3.64845 | 0.00028  |
| O | -3.63259 | -1.31652 | 0.00033  |
| H | -3.94060 | -2.23880 | 0.00041  |
| H | 1.44276  | -3.43234 | 0.00041  |

|   |         |          |          |
|---|---------|----------|----------|
| C | 2.71735 | -0.01702 | -0.00042 |
| H | 3.62467 | 1.94568  | 0.00021  |
| O | 2.63429 | -2.38311 | -0.00004 |
| O | 3.97453 | 0.07394  | -0.00066 |

ii

|   |          |          |          |
|---|----------|----------|----------|
| C | 2.30595  | 2.24341  | 0.16176  |
| C | 2.82319  | 0.96554  | 0.19859  |
| C | 1.99813  | -0.19913 | 0.03373  |
| C | 0.59314  | 0.02416  | -0.17583 |
| C | 0.05821  | 1.34911  | -0.22108 |
| C | 0.92835  | 2.45003  | -0.04135 |
| H | 2.94886  | 3.11047  | 0.29038  |
| C | 2.50403  | -1.53600 | 0.07433  |
| C | -0.31388 | -1.08120 | -0.35994 |
| C | 0.23153  | -2.37716 | -0.30817 |
| C | 1.60392  | -2.57656 | -0.09763 |
| H | 1.97291  | -3.60087 | -0.06857 |
| C | -1.69879 | -0.79584 | -0.57395 |
| O | -2.62583 | -1.76604 | -0.76476 |
| C | -1.35876 | 1.62537  | -0.43323 |
| C | 3.95545  | -1.90455 | 0.29206  |
| H | 4.60731  | -1.48507 | -0.48051 |
| H | 4.33462  | -1.53418 | 1.24965  |
| H | 4.06544  | -2.99368 | 0.27858  |
| O | -0.58624 | -3.45483 | -0.46985 |
| H | -0.04557 | -4.25868 | -0.40117 |
| O | 0.47343  | 3.70122  | -0.06579 |
| O | 4.16070  | 0.78368  | 0.39485  |
| H | 4.57758  | 1.65613  | 0.48834  |
| H | -0.55170 | 3.58468  | -0.22786 |
| C | -2.25307 | 0.50397  | -0.65719 |

|   |          |          |          |
|---|----------|----------|----------|
| H | -3.43754 | -1.18728 | -0.86948 |
| O | -1.79314 | 2.82976  | -0.45553 |
| O | -3.51387 | 0.60620  | -0.88569 |
| O | -2.89697 | -0.38166 | 2.10167  |
| O | -4.06012 | -0.49813 | 1.69359  |

iii

|   |          |          |          |
|---|----------|----------|----------|
| C | 2.05757  | 2.32547  | 0.09853  |
| C | 2.60850  | 1.06234  | 0.02347  |
| C | 1.80674  | -0.12080 | -0.10267 |
| C | 0.37508  | 0.04743  | -0.11482 |
| C | -0.19136 | 1.37986  | -0.08981 |
| C | 0.66763  | 2.49705  | 0.02684  |
| H | 2.68774  | 3.20612  | 0.18944  |
| C | 2.36128  | -1.43870 | -0.19908 |
| C | -0.48317 | -1.08719 | -0.19007 |
| C | 0.08957  | -2.35098 | -0.24354 |
| C | 1.49137  | -2.50418 | -0.28276 |
| H | 1.89539  | -3.51287 | -0.35380 |
| C | -1.95823 | -0.86857 | -0.02468 |
| O | -2.76379 | -1.88382 | -0.51773 |
| C | -1.60349 | 1.63428  | -0.27053 |
| C | 3.84280  | -1.75137 | -0.22471 |
| H | 4.35379  | -1.25056 | -1.05226 |
| H | 4.34456  | -1.42942 | 0.69237  |
| H | 3.98808  | -2.83069 | -0.33431 |
| O | -0.69220 | -3.46658 | -0.25355 |
| H | -0.11012 | -4.24316 | -0.23025 |
| O | 0.19678  | 3.74938  | 0.04913  |
| O | 3.96196  | 0.91874  | 0.06786  |
| H | 4.36290  | 1.79871  | 0.16107  |
| H | -0.80724 | 3.65343  | -0.06990 |



|   |          |          |          |
|---|----------|----------|----------|
| C | -2.48009 | 0.46342  | -0.50811 |
| H | -3.57923 | -1.40024 | -0.77953 |
| O | -2.09390 | 2.79944  | -0.32214 |
| O | -3.64626 | 0.54607  | -0.92021 |
| O | -2.29171 | -0.59013 | 1.39424  |
| O | -1.25100 | -0.78805 | 2.30100  |

iv

|   |          |          |          |
|---|----------|----------|----------|
| C | 2.06580  | 2.37428  | -0.00552 |
| C | 2.66265  | 1.13394  | -0.03137 |
| C | 1.90360  | -0.08654 | -0.03321 |
| C | 0.46266  | 0.02920  | -0.03728 |
| C | -0.15581 | 1.34243  | -0.02077 |
| C | 0.66553  | 2.48984  | 0.01488  |
| H | 2.66179  | 3.28294  | 0.00820  |
| C | 2.51361  | -1.38331 | -0.01520 |
| C | -0.33815 | -1.14783 | -0.04304 |
| C | 0.28941  | -2.38597 | 0.01843  |
| C | 1.69234  | -2.49210 | 0.01920  |
| H | 2.13944  | -3.48436 | 0.04942  |
| C | -1.84408 | -1.05612 | -0.06341 |
| O | -2.41882 | -1.88861 | -1.00394 |
| C | -1.59844 | 1.54174  | -0.03517 |
| C | 4.00767  | -1.63549 | -0.02240 |
| H | 4.49050  | -1.21417 | -0.90878 |
| H | 4.50446  | -1.19021 | 0.84432  |
| H | 4.19652  | -2.71350 | -0.00936 |
| O | -0.47720 | -3.51136 | 0.09042  |
| H | 0.10916  | -4.28232 | 0.15273  |
| O | 0.16098  | 3.72817  | 0.06141  |
| O | 4.02122  | 1.04409  | -0.04803 |

|   |          |          |          |
|---|----------|----------|----------|
| H | 4.38945  | 1.94313  | -0.03840 |
| H | -0.84502 | 3.59716  | 0.07593  |
| C | -2.52033 | 0.34639  | -0.20639 |
| H | -3.10900 | -1.25834 | -1.38153 |
| O | -2.10649 | 2.68620  | 0.03879  |
| O | -3.38299 | 0.43674  | -1.15751 |
| O | -2.37734 | -1.22020 | 1.27886  |
| O | -3.09135 | 0.08708  | 1.23687  |

O2-

|   |         |         |          |
|---|---------|---------|----------|
| O | 0.00000 | 0.00000 | 0.67492  |
| O | 0.00000 | 0.00000 | -0.67492 |

O2 triplet

|   |         |         |          |
|---|---------|---------|----------|
| O | 0.00000 | 0.00000 | 0.60710  |
| O | 0.00000 | 0.00000 | -0.60710 |

OH-

|   |          |         |         |
|---|----------|---------|---------|
| O | -0.88630 | 0.78309 | 0.00000 |
| H | -1.29682 | 1.67358 | 0.00000 |

15

|   |         |          |          |
|---|---------|----------|----------|
| C | 0.57155 | -2.80921 | -0.07695 |
| C | 1.74619 | -2.10780 | 0.00049  |
| C | 1.76606 | -0.67540 | 0.03815  |

|   |          |          |          |
|---|----------|----------|----------|
| C | 0.48408  | 0.00638  | 0.04702  |
| C | -0.74422 | -0.76042 | 0.10312  |
| C | -0.68378 | -2.15430 | -0.03180 |
| H | 0.57382  | -3.89529 | -0.14564 |
| C | 2.98337  | 0.08198  | 0.03794  |
| C | 0.44731  | 1.43973  | -0.05321 |
| C | 1.65298  | 2.12511  | -0.04776 |
| C | 2.89231  | 1.45708  | 0.01877  |
| H | 3.80809  | 2.04953  | 0.01693  |
| C | -0.84598 | 2.24304  | -0.33995 |
| O | -1.07364 | 3.23578  | 0.38564  |
| C | -2.01968 | -0.12173 | 0.60344  |
| C | 4.37698  | -0.51614 | 0.04261  |
| H | 4.55451  | -1.15634 | 0.91222  |
| H | 4.56553  | -1.13557 | -0.84016 |
| H | 5.11885  | 0.29026  | 0.05603  |
| O | 1.65815  | 3.49884  | -0.16513 |
| H | 2.58473  | 3.77841  | -0.23422 |
| O | -1.75412 | -2.96133 | -0.06775 |
| O | 2.94370  | -2.78774 | 0.01380  |
| H | 2.73753  | -3.73610 | -0.01025 |
| H | -2.57459 | -2.36612 | -0.37383 |
| C | -3.41913 | -0.37198 | -0.06097 |
| O | -1.98445 | 0.56933  | 1.61421  |
| O | -4.29899 | 0.46225  | 0.17326  |
| O | -1.51328 | 1.81622  | -1.32163 |
| O | -3.55445 | -1.43920 | -0.76571 |

15'

|   |          |          |          |
|---|----------|----------|----------|
| C | -0.62884 | -2.82993 | 0.13584  |
| C | -1.78918 | -2.10679 | 0.05522  |
| C | -1.77916 | -0.67165 | -0.01829 |

|   |          |          |          |
|---|----------|----------|----------|
| C | -0.48465 | -0.02947 | -0.02786 |
| C | 0.73089  | -0.81068 | -0.08904 |
| C | 0.64467  | -2.21134 | 0.05998  |
| H | -0.65437 | -3.91371 | 0.21860  |
| C | -2.97719 | 0.11419  | -0.06846 |
| C | -0.44506 | 1.40495  | 0.05903  |
| C | -1.62485 | 2.13436  | 0.01844  |
| C | -2.87081 | 1.48985  | -0.08068 |
| H | -3.77243 | 2.09773  | -0.12313 |
| C | 0.80901  | 2.13262  | 0.42568  |
| O | 1.10949  | 3.16125  | -0.39131 |
| C | 1.99228  | -0.18391 | -0.61286 |
| C | -4.37812 | -0.46092 | -0.11305 |
| H | -4.51895 | -1.12955 | -0.96661 |
| H | -4.60768 | -1.04657 | 0.78157  |
| H | -5.10641 | 0.35271  | -0.18803 |
| O | -1.56987 | 3.49561  | 0.13759  |
| H | -2.47738 | 3.83735  | 0.17555  |
| O | 1.67963  | -3.03909 | 0.07165  |
| O | -2.99709 | -2.74816 | 0.07147  |
| H | -2.82863 | -3.70379 | 0.11506  |
| H | 2.58585  | -2.47078 | 0.21521  |
| C | 3.40813  | -0.46708 | -0.00326 |
| H | 1.94291  | 3.53718  | -0.04748 |
| O | 1.92682  | 0.61002  | -1.54702 |
| O | 4.19585  | 0.48318  | -0.00581 |
| O | 1.48597  | 1.86482  | 1.40119  |
| O | 3.64349  | -1.65087 | 0.43411  |
